# Supplementary material for: KARR-seq reveals cellular higher-order RNA structures and RNA–RNA interactions
Source: Nat Biotechnol. 2024 Jan 18;42(12):1909–20. doi: 10.1038/s41587-023-02109-8 (PMC11255127; doi:10.1038/s41587-023-02109-8)
Supplement: Supplementary file 4 — Differential RNA–RNA interactions between arsenite and control conditions. [file 41587_2023_2109_MOESM4_ESM.xlsx]

## Sheet: KARRseq_arsenite-vs-control_dif
gene	transcript	start1	end1	start2	end2	ctrl_rep1	ctrl_rep2	arsenite_rep1	arsenite_rep2	baseMean	log2FoldChange(ctrl/arsenite)	lfcSE	stat	pvalue	padj	significant	direction
SFPQ	NR_136702	482	555	793	857	79	88	86	122	93.845	-0.553299	0.275491	-2.00824	0.0446178	0.153192	N	NA
SFPQ	NR_136702	634	728	821	907	71	59	46	44	53.8301	0.251724	0.34349	0.732775	0.463696	0.646297	N	NA
SFPQ	NR_136702	109	179	322	402	46	48	63	51	52.5342	-0.527671	0.354882	-1.48679	0.13707	0.313381	N	NA
SFPQ	NR_136702	1474	1549	1782	1832	32	30	11	27	24.0672	0.430014	0.503723	0.853019	0.393649	0.58651	N	NA
SFPQ	NR_136702	1017	1068	1358	1452	12	17	26	17	18.4785	-0.754326	0.557721	-1.35163	0.176495	0.367711	N	NA
SFPQ	NM_005066	478	552	789	854	82	86	90	122	95.1795	-0.575259	0.270118	-2.12946	0.0332162	0.123354	N	NA
SFPQ	NM_005066	631	725	826	905	77	58	49	43	55.5053	0.268578	0.34393	0.780834	0.4349	0.625745	N	NA
SFPQ	NM_005066	106	176	319	399	40	48	55	49	48.4098	-0.484204	0.366454	-1.32126	0.186414	0.37705	N	NA
SFPQ	NM_005066	1539	1611	1824	1914	52	48	31	44	42.7702	0.153417	0.379287	0.404448	0.685883	0.821268	N	NA
SFPQ	NR_136703	483	554	791	857	74	76	84	113	87.0563	-0.631323	0.280018	-2.25428	0.0241786	0.10083	N	NA
SFPQ	NR_136703	633	728	816	906	68	53	46	43	51.507	0.164905	0.351624	0.468961	0.639098	0.788175	N	NA
SFPQ	NR_136703	101	170	305	377	36	39	50	37	40.9153	-0.462877	0.398149	-1.16255	0.245011	0.451469	N	NA
SFPQ	NR_136703	1473	1545	1796	1836	23	22	6	22	17.508	0.405729	0.583451	0.694653	0.487273	0.661597	N	NA
USP24	NM_015306	212	297	410	510	18	12	9	13	12.6432	0.161305	0.624335	0.258252	0.796212	0.891192	N	NA
ACBD6	NM_032360	340	426	522	600	27	13	14	15	16.7824	0.165583	0.571643	0.289577	0.77214	0.875357	N	NA
ACBD6	NM_032360	166	248	369	466	18	15	11	16	14.696	0.0294945	0.587878	0.0501636	0.959992	0.976726	N	NA
SKI	NM_003036	54	145	276	377	10	11	14	23	14.6692	-0.935719	0.598431	-1.56026	0.118697	0.290117	N	NA
SKI	NM_003036	1988	2058	2184	2281	13	10	11	19	13.194	-0.553734	0.61748	-0.89604	0.370231	0.569885	N	NA
SPEN	NM_015001	2319	2427	2593	2640	15	13	10	15	13.0302	-0.0792525	0.614685	-0.128918	0.897422	0.945119	N	NA
NBPF1	NM_017940	1510	1587	2306	2365	4	7	20	19	13.15	-1.77843	0.647911	-2.71139	0.00670025	0.0409693	Y	arsenite
UBR4	NM_020765	8568	8635	8793	8872	23	26	28	35	28.1392	-0.576532	0.454861	-1.26712	0.205113	0.398479	N	NA
UBR4	NM_020765	14526	14633	14722	14820	15	12	13	30	17.4744	-0.814942	0.570543	-1.42627	0.15379	0.33575	N	NA
UBR4	NM_020765	13139	13268	13357	13405	12	11	13	23	14.8112	-0.788182	0.594929	-1.32287	0.185879	0.37705	N	NA
UBR4	NM_020765	11537	11634	11742	11818	14	7	10	24	13.6797	-0.817396	0.630447	-1.29393	0.195689	0.38699	N	NA
HP1BP3	NM_016287	1451	1509	1661	1730	20	14	15	19	16.8135	-0.237315	0.559032	-0.424469	0.671224	0.81014	N	NA
HSPG2	NM_005529	11955	12049	12172	12237	16	22	9	13	14.5796	0.478999	0.598321	0.799724	0.423871	0.615397	N	NA
HSPG2	NM_005529	1772	1826	2090	2178	25	18	7	7	13.4718	1.16846	0.625172	1.85737	0.0632578	0.193727	N	NA
HSPG2	NM_005529	3370	3434	3758	3838	25	19	4	9	13.3466	1.29914	0.636302	2.02478	0.0428897	0.148932	N	NA
LDLRAD2	NM_001013693	2174	2280	2407	2477	18	16	6	11	12.2123	0.646919	0.637674	1.0121	0.31149	0.52315	N	NA
SRSF4	NM_005626	1147	1263	1398	1485	16	11	26	16	17.6674	-0.828619	0.567071	-1.45955	0.144413	0.324928	N	NA
PTP4A2	NM_080391	80	172	317	384	58	47	22	30	37.6621	0.71608	0.405217	1.76548	0.0774832	0.221185	N	NA
PTP4A2	NM_080391	59	173	228	302	40	39	16	20	27.5985	0.817459	0.462452	1.76488	0.077584	0.221185	N	NA
MAST2	NM_001324320	146	239	313	419	17	8	9	16	12.242	-0.225232	0.642228	-0.350557	0.725921	0.847468	N	NA
SERBP1	NM_015640	223	298	372	459	57	41	30	47	42.6644	0.0865214	0.386451	0.223863	0.822864	0.89767	N	NA
SERBP1	NM_015640	139	198	355	423	26	16	11	20	17.677	0.163062	0.558423	0.29188	0.770378	0.874755	N	NA
SERBP1	NM_001018069	223	298	372	459	57	41	30	47	42.6644	0.0865214	0.386451	0.223863	0.822864	0.89767	N	NA
SERBP1	NM_001018069	139	198	355	423	26	16	11	20	17.677	0.163062	0.558423	0.29188	0.770378	0.874755	N	NA
SERBP1	NM_001018068	191	291	361	421	51	37	22	52	39.371	0.00586034	0.421563	0.0138992	0.98891	0.99285	N	NA
SERBP1	NM_001018068	217	283	381	464	47	33	29	23	32.2223	0.321778	0.437127	0.735966	0.461751	0.645471	N	NA
SERBP1	NM_001018068	410	490	625	686	21	32	13	8	17.9179	0.953592	0.573571	1.65805	0.0973074	0.254674	N	NA
SERBP1	NM_001018067	222	298	372	459	60	45	30	49	44.7679	0.148568	0.3794	0.391532	0.695404	0.826613	N	NA
SERBP1	NM_001018067	141	208	359	444	34	21	16	25	23.3097	0.149878	0.498903	0.300332	0.763924	0.871907	N	NA
SERBP1	NM_001018067	425	515	627	696	21	27	12	11	17.2058	0.718261	0.564298	1.27066	0.203851	0.396902	N	NA
RBM15	NM_022768	715	785	1008	1066	18	19	22	19	19.5961	-0.37839	0.528022	-0.716622	0.473607	0.65218	N	NA
RBM15	NM_001201545	717	785	1007	1066	18	22	25	15	20.1605	-0.250327	0.536465	-0.466746	0.640681	0.788175	N	NA
RBM15	NM_001201545	302	392	1008	1064	20	11	9	10	12.0762	0.371772	0.639366	0.580929	0.561288	0.725357	N	NA
NBPF12	NM_001278141	4528	4601	5249	5305	11	3	26	38	20.282	-2.18425	0.57935	-3.71406	0.000203963	0.00318399	Y	arsenite
NBPF12	NM_001278141	2127	2223	2928	2992	18	12	11	25	16.272	-0.452483	0.58236	-0.77653	0.437436	0.626837	N	NA
SPTA1	NM_003126	3812	3877	4075	4149	8	9	13	22	13.2195	-1.11498	0.625811	-1.77516	0.0758709	0.21833	N	NA
FAM129A	NM_052966	2557	2625	2744	2819	4	2	20	25	13.4901	-2.62945	0.679918	-3.70477	0.000211587	0.00327403	Y	arsenite
WASH7P	NR_024540	169	232	326	446	23	22	10	20	18.16	0.307569	0.550655	0.55821	0.576701	0.740231	N	NA
WASH7P	NR_024540	465	547	724	794	13	13	14	22	15.5368	-0.638892	0.57994	-1.10075	0.271007	0.479407	N	NA
LOC729737	NR_039983	3232	3295	3491	3554	81	73	57	49	63.7666	0.259541	0.322057	0.805831	0.42034	0.612933	N	NA
LOC729737	NR_039983	3021	3100	3344	3423	60	57	28	40	44.7433	0.506279	0.374242	1.35221	0.176308	0.367711	N	NA
LOC729737	NR_039983	3489	3550	3784	3832	51	47	32	30	39.0506	0.374234	0.395185	0.946754	0.343764	0.548778	N	NA
LOC729737	NR_039983	2569	2651	4308	4435	13	14	24	23	18.9282	-0.963419	0.539982	-1.78118	0.0748824	0.216545	N	NA
LOC729737	NR_039983	203	272	391	481	10	23	19	17	17.4372	-0.333837	0.577192	-0.578521	0.562913	0.726924	N	NA
LOC100132062	NR_028325	2296	2380	3155	3238	22	36	37	33	32.3939	-0.495537	0.445604	-1.11202	0.266129	0.472527	N	NA
LOC100132062	NR_028325	2704	2777	2874	2955	21	13	15	10	14.5061	0.137174	0.601898	0.2279	0.819724	0.89767	N	NA
LOC100132062	NR_028325	2424	2482	3045	3164	4	6	22	20	13.7473	-1.99318	0.644611	-3.04107	0.00235738	0.0189019	Y	arsenite
LOC100133331	NR_028327	2350	2413	3032	3123	14	20	20	23	19.4051	-0.53605	0.534136	-1.00332	0.315705	0.526946	N	NA
LOC100133331	NR_028327	2423	2480	2949	3068	4	6	22	21	14.0013	-2.025	0.641118	-3.10479	0.00190412	0.0163052	Y	arsenite
NOC2L	NM_015658	1734	1824	1955	2022	28	27	7	8	16.5054	1.42932	0.585438	2.42152	0.0154557	0.0744913	N	NA
NOC2L	NM_015658	103	165	345	416	17	21	8	9	13.2525	0.787985	0.620697	1.26601	0.205509	0.398809	N	NA
AGRN	NM_001305275	1503	1591	1791	1854	17	19	12	8	13.685	0.502734	0.61375	0.818398	0.41313	0.60629	N	NA
ACAP3	NM_030649	1750	1819	2002	2094	23	23	6	21	17.4907	0.480488	0.5816	0.825102	0.409313	0.602193	N	NA
AURKAIP1	NM_001127230	452	517	647	718	29	28	15	13	20.5489	0.690989	0.522192	1.32142	0.186363	0.37705	N	NA
AURKAIP1	NM_001127230	217	299	441	512	12	28	14	7	15.0626	0.576789	0.628094	0.917667	0.358793	0.559642	N	NA
AURKAIP1	NM_001127229	261	338	455	561	16	30	13	11	17.1264	0.60967	0.579262	1.05136	0.293095	0.506535	N	NA
DVL1	NM_004421	2378	2465	2635	2713	23	18	20	18	19.6051	-0.148649	0.526411	-0.282405	0.777633	0.879432	N	NA
CCNL2	NR_135154	3319	3414	3548	3644	15	11	20	28	18.7598	-1.03363	0.543893	-1.89618	0.0579367	0.182827	N	NA
CCNL2	NR_135154	3721	3812	4051	4131	13	11	18	21	15.9693	-0.858756	0.573342	-1.49543	0.134801	0.31126	N	NA
ATAD3B	NM_031921	32	101	197	279	21	16	11	10	14.0565	0.47868	0.601758	0.794658	0.426813	0.618143	N	NA
CCNL2	NM_001320153	1875	1936	2111	2210	17	14	22	29	20.7365	-0.892749	0.518494	-1.71941	0.08554	0.233942	N	NA
CCNL2	NM_001320153	2291	2382	2621	2701	13	11	18	21	15.9693	-0.858756	0.573342	-1.49543	0.134801	0.31126	N	NA
CCNL2	NM_001320155	1112	1193	1335	1429	17	13	26	26	20.8976	-0.971434	0.518699	-1.86974	0.0615194	0.190721	N	NA
CCNL2	NM_001320155	1578	1671	1905	1988	15	16	22	23	19.2538	-0.726038	0.531931	-1.36385	0.172615	0.363791	N	NA
CCNL2	NM_001320155	1494	1589	1679	1750	14	13	18	17	15.6427	-0.572061	0.575501	-0.993561	0.320437	0.52926	N	NA
CCNL2	NM_030937	1567	1658	1891	1974	15	11	20	22	17.2354	-0.861789	0.557834	-1.54256	0.122937	0.296219	N	NA
CCNL2	NM_030937	1105	1190	1334	1418	17	9	16	25	16.7957	-0.820126	0.572795	-1.42958	0.152837	0.335321	N	NA
TP73-AS1	NR_033711	2453	2515	2806	2895	18	14	11	19	15.2213	-0.141227	0.583833	-0.241855	0.808892	0.897413	N	NA
LRRC47	NM_020710	526	592	787	876	13	9	15	17	13.6092	-0.70805	0.608552	-1.16212	0.245186	0.451469	N	NA
ENO1	NM_001428	1121	1184	1295	1389	37	45	2	10	21.7703	2.25334	0.580841	3.80121	0.000143991	0.00244231	Y	control
ENO1	NM_001428	1603	1691	1814	1898	38	27	4	8	17.7952	1.91996	0.593855	3.18143	0.00146552	0.0136782	Y	control
ENO1	NM_001428	1319	1412	1561	1646	32	29	2	6	15.8847	2.29678	0.639071	3.48712	0.000488244	0.00657452	Y	control
ENO1	NM_001428	430	512	638	715	24	16	10	7	13.6522	0.827951	0.619684	1.33231	0.18276	0.374545	N	NA
ENO1	NM_001201483	1984	2055	2181	2261	50	45	6	12	26.2466	1.96795	0.510163	3.81259	0.000137517	0.0024258	Y	control
ENO1	NM_001201483	1482	1544	1661	1748	39	63	2	7	25.7033	2.8873	0.583054	4.76867	1.85442921854517e-06	7.97856863783824e-05	Y	control
ENO1	NM_001201483	1696	1775	1924	2009	40	30	4	8	18.9377	2.02506	0.583772	3.40875	0.000652608	0.00793931	Y	control
MTHFR	NM_001330358	3708	3782	4070	4149	5	13	24	23	16.9634	-1.44074	0.594131	-2.41284	0.0158287	0.0753758	N	NA
MTHFR	NM_001330358	4813	4886	5051	5118	9	10	26	14	15.4105	-1.18956	0.607209	-1.95264	0.0508626	0.168018	N	NA
MTHFR	NM_005957	3668	3739	4012	4089	14	22	45	39	31.1949	-1.38493	0.45933	-3.00744	0.00263459	0.0207474	Y	arsenite
MTHFR	NM_005957	4777	4842	5028	5093	17	21	33	31	26.093	-0.941404	0.476642	-1.97288	0.0485097	0.16176	N	NA
MTHFR	NM_005957	4132	4210	4349	4449	13	12	22	19	16.8582	-0.881771	0.564643	-1.55933	0.118918	0.29014	N	NA
MTHFR	NM_005957	2257	2322	2445	2533	17	14	12	17	14.7873	-0.142654	0.5861	-0.243377	0.807713	0.897413	N	NA
EFHD2	NM_024329	449	532	667	718	43	26	7	7	19.2544	1.80386	0.572688	3.111	0.00186453	0.0161497	Y	control
CROCCP2	NR_026752	262	344	491	572	11	17	18	17	15.9421	-0.514594	0.578944	-0.888699	0.374165	0.571206	N	NA
RCC2	NM_018715	3592	3672	3849	3985	19	20	13	34	21.2494	-0.454565	0.534157	-0.85066	0.394958	0.58651	N	NA
RCC2	NM_018715	219	298	389	483	25	26	18	11	19.5733	0.486751	0.539828	0.901168	0.367499	0.567221	N	NA
RCC2	NM_001136204	3430	3501	3673	3807	21	18	12	29	19.6473	-0.281659	0.542981	-0.518587	0.604048	0.764084	N	NA
RCC2	NM_001136204	61	137	229	323	21	15	17	12	16.068	0.0261758	0.575434	0.0454933	0.963714	0.976726	N	NA
KDM1A	NM_015013	243	340	425	510	19	30	5	13	15.9621	1.06869	0.605528	1.75686	0.0789416	0.222094	N	NA
KDM1A	NM_001009999	149	229	373	478	17	24	6	12	14.1451	0.830432	0.616264	1.34335	0.179159	0.370066	N	NA
STMN1	NM_203401	746	833	966	1016	30	23	7	14	17.5143	0.969724	0.567242	1.70346	0.0884825	0.239391	N	NA
HMGN2	NM_005517	204	264	379	460	28	18	5	12	14.8099	1.03541	0.611912	1.684	0.0921809	0.244562	N	NA
ARID1A	NM_006015	548	622	881	973	32	35	64	64	50.0242	-1.14884	0.361413	-3.17549	0.00149583	0.0138149	Y	arsenite
ARID1A	NM_006015	1059	1138	1365	1453	28	29	27	27	27.6072	-0.172961	0.455958	-0.379363	0.704418	0.830611	N	NA
ARID1A	NM_006015	374	444	571	675	13	21	34	27	24.5029	-1.01686	0.50239	-2.02133	0.0432453	0.149862	N	NA
ARID1A	NM_006015	376	450	1272	1350	11	8	27	29	19.4697	-1.64622	0.549484	-2.97514	0.00292854	0.0221714	Y	arsenite
ARID1A	NM_006015	52	147	438	528	9	14	13	29	16.3981	-0.969116	0.591309	-1.63559	0.101925	0.260953	N	NA
ARID1A	NM_139135	511	585	927	1011	22	26	44	49	36.1208	-1.14653	0.416014	-2.75208	0.00592176	0.0377111	Y	arsenite
ARID1A	NM_139135	1022	1115	1325	1437	31	28	33	32	31.0289	-0.383114	0.43424	-0.882227	0.377654	0.5738	N	NA
ARID1A	NM_139135	614	714	833	899	17	13	27	28	21.6958	-1.04702	0.511781	-2.0419	0.0411617	0.14464	N	NA
ARID1A	NM_139135	374	443	567	686	11	15	27	26	20.3654	-1.16936	0.531924	-2.19279	0.0283224	0.112019	N	NA
ARID1A	NM_139135	59	145	491	559	10	11	11	18	12.5288	-0.616263	0.628666	-0.979383	0.327391	0.534264	N	NA
ATP5IF1	NM_178191	194	273	1657	1702	91	72	36	38	56.8041	0.841193	0.339983	2.47221	0.013428	0.0681479	N	NA
ATP5IF1	NM_178191	136	273	1657	1728	36	25	38	54	38.4379	-0.809693	0.404398	-2.00095	0.0453975	0.155196	N	NA
SESN2	NM_031459	134	209	403	469	12	14	25	22	18.7482	-1.01157	0.545319	-1.85154	0.0640924	0.195266	N	NA
SESN2	NM_031459	311	395	465	560	11	11	27	16	16.8775	-1.10952	0.581471	-1.90328	0.0570037	0.18174	N	NA
SESN2	NM_031459	1028	1146	1297	1335	1	5	26	22	14.5308	-2.69728	0.679421	-3.80508	0.000141761	0.00244231	Y	arsenite
MARCKSL1	NR_052852	167	249	365	434	23	21	10	6	14.3664	1.03133	0.612476	1.67686	0.0935704	0.246724	N	NA
MARCKSL1	NR_052852	341	429	485	569	14	17	7	15	12.8914	0.224386	0.627611	0.357321	0.720852	0.843784	N	NA
MARCKSL1	NM_023009	210	292	409	486	29	38	9	11	20.6689	1.35162	0.539825	2.48946	0.0127937	0.0661076	N	NA
MARCKSL1	NM_023009	389	477	594	687	32	23	9	13	18.2724	0.954607	0.553349	1.71957	0.08551	0.233942	N	NA
MARCKSL1	NM_023009	556	635	741	826	16	25	10	20	17.3586	0.195963	0.570022	0.343675	0.73109	0.850991	N	NA
MAP7D1	NM_001286366	1699	1757	2302	2388	20	17	35	36	27.644	-1.12529	0.463608	-2.42287	0.0153985	0.0744191	N	NA
MAP7D1	NM_001286366	2038	2097	2263	2351	22	21	27	27	24.4165	-0.550309	0.480921	-1.14397	0.252636	0.459144	N	NA
MAP7D1	NM_018067	1795	1861	2379	2469	23	21	35	39	30.0016	-0.950023	0.444283	-2.136	0.0326793	0.122652	N	NA
MAP7D1	NM_018067	2141	2202	2366	2450	27	22	26	34	27.2216	-0.5152	0.459738	-1.12032	0.262576	0.469284	N	NA
MAP7D1	NM_018067	1389	1477	1627	1703	11	14	22	13	15.3756	-0.671952	0.596226	-1.12646	0.259973	0.466857	N	NA
MAP7D1	NM_001286365	1663	1729	2282	2367	29	20	46	47	36.2837	-1.13139	0.416158	-2.71478	0.00663194	0.0409047	Y	arsenite
MAP7D1	NM_001286365	2031	2096	2268	2367	30	23	33	31	29.3746	-0.510106	0.447175	-1.14051	0.254074	0.460905	N	NA
MAP7D1	NM_001286365	1275	1358	1518	1592	10	19	20	12	15.5096	-0.359203	0.602665	-0.596228	0.551023	0.714709	N	NA
SMAP2	NM_022733	201	293	376	440	18	19	10	12	14.3371	0.435301	0.595278	0.730598	0.465025	0.646927	N	NA
SMAP2	NM_022733	94	166	274	371	15	21	7	10	12.7845	0.724326	0.631241	1.1446	0.252374	0.459144	N	NA
CTPS1	NR_125440	1894	1994	2073	2141	19	21	12	7	14.3366	0.698686	0.609309	1.14473	0.252319	0.459144	N	NA
YBX1	NR_132737	553	628	735	829	48	23	16	17	24.7749	0.75907	0.502892	1.50712	0.131779	0.307891	N	NA
YBX1	NR_132737	755	824	956	1035	32	30	19	17	23.847	0.477023	0.488454	0.976017	0.329056	0.534981	N	NA
YBX1	NM_004559	965	1021	1147	1222	61	69	27	20	42.4302	1.14042	0.400487	2.84226	0.00447952	0.0305091	Y	control
YBX1	NM_004559	741	819	908	1008	59	38	18	19	31.7916	1.04791	0.4469	2.33965	0.0193016	0.0857634	N	NA
YBX1	NM_004559	256	341	445	520	25	34	20	18	23.8265	0.3462	0.495117	0.699053	0.484519	0.661303	N	NA
RPS8	NM_001012	363	425	509	600	105	85	39	36	63.269	1.03536	0.328604	3.14739	0.00164735	0.0150566	Y	control
RPS8	NM_001012	91	175	372	430	59	64	22	37	43.6828	0.776189	0.387832	1.99945	0.0455594	0.155448	N	NA
PRDX1	NM_181696	61	111	305	369	25	22	8	12	15.9795	0.869269	0.578929	1.49694	0.134408	0.31126	N	NA
PRDX1	NM_002574	61	111	331	395	25	22	8	12	15.9795	0.869269	0.578929	1.49694	0.134408	0.31126	N	NA
UQCRH	NM_001297565	167	208	416	474	30	20	10	10	16.6577	0.93493	0.57378	1.62417	0.104341	0.265211	N	NA
UQCRH	NM_001297565	118	202	392	433	33	25	7	4	16.0954	1.84313	0.614079	2.95561	0.00312051	0.0231285	Y	control
JUN	NM_002228	482	539	723	817	9	8	79	75	45.807	-3.22425	0.448809	-7.01226	2.34495400725605e-12	3.76045351709061e-10	Y	arsenite
JUN	NM_002228	760	824	954	1053	11	4	72	60	39.4504	-3.15739	0.485275	-6.34012	2.29580513244557e-10	2.53112515852125e-08	Y	arsenite
JUN	NM_002228	1397	1491	1666	1751	4	5	39	58	28.0955	-3.28626	0.556443	-5.65219	1.58417554515421e-08	1.33070745792954e-06	Y	arsenite
JUN	NM_002228	1726	1799	2009	2081	5	1	35	41	21.8849	-3.37813	0.622791	-5.08197	3.735474019498e-07	2.05918005324827e-05	Y	arsenite
JUN	NM_002228	252	332	426	499	5	2	25	25	15.1564	-2.62991	0.654998	-3.86641	0.00011045	0.00205088	Y	arsenite
RPL5	NM_000969	645	710	818	889	15	18	10	13	13.7063	0.23668	0.605479	0.390763	0.695972	0.826731	N	NA
SCARNA2	NR_003023	11	74	178	256	69	62	66	121	79.4721	-0.736731	0.309433	-2.38032	0.0172977	0.0794614	N	NA
SCARNA2	NR_003023	94	178	277	363	33	26	46	48	38.8228	-0.89378	0.398399	-2.24179	0.0249746	0.102693	N	NA
AHCYL1	NM_001242673	348	410	781	838	16	21	5	12	12.9285	0.76676	0.636703	1.20065	0.229885	0.435105	N	NA
HIST2H4A	NM_003548	38	118	240	322	26	25	5	4	14.0034	1.90958	0.643676	2.9086	0.00363048	0.0258391	Y	control
HIST2H4A	NM_003548	118	197	248	363	19	22	7	6	12.8691	1.19948	0.637592	1.86869	0.0616657	0.190839	N	NA
HIST2H2AA3	NM_003516	130	230	351	427	71	57	11	26	38.6316	1.45451	0.429887	3.37058	0.0007501	0.00870511	Y	control
HIST2H2AA3	NM_003516	17	114	175	277	61	53	13	13	32.8016	1.74572	0.452604	3.8309	0.000127673	0.00229812	Y	control
HIST2H3C	NM_021059	59	141	254	349	45	39	13	14	26.284	1.27183	0.481492	2.63081	0.0085181	0.0486814	Y	control
HIST2H3C	NM_021059	194	283	358	444	25	33	9	7	17.6045	1.4181	0.579016	2.43144	0.015039	0.0731814	N	NA
HIST2H4B	NM_001034077	38	118	240	318	24	27	5	4	14.0451	1.91197	0.644555	2.90841	0.00363271	0.0258391	Y	control
HIST2H4B	NM_001034077	118	198	248	364	18	20	7	6	12.1794	1.09822	0.646648	1.68851	0.0913136	0.243319	N	NA
HIST2H2AA4	NM_001040874	126	229	353	428	72	57	11	26	38.8476	1.46493	0.429406	3.39838	0.000677851	0.00813422	Y	control
HIST2H2AA4	NM_001040874	18	114	175	277	62	53	13	15	33.5258	1.66422	0.445375	3.7145	0.000203607	0.00318399	Y	control
HIST2H3A	NM_001005464	60	141	260	349	46	40	13	15	26.9909	1.25899	0.475722	2.63629	0.00838181	0.0484771	Y	control
HIST2H3A	NM_001005464	194	283	358	444	25	35	8	8	18.0422	1.47122	0.575081	2.53826	0.0111405	0.0604672	N	NA
MCL1	NM_021960	203	291	505	589	29	35	41	37	35.8455	-0.519539	0.415001	-1.25177	0.210652	0.40659	N	NA
MCL1	NM_021960	259	330	419	504	21	23	27	25	24.166	-0.467954	0.484961	-0.964829	0.33463	0.541052	N	NA
MCL1	NM_021960	484	565	688	739	25	13	29	20	21.9714	-0.600104	0.523791	-1.14522	0.252117	0.459144	N	NA
MCL1	NM_182763	206	301	568	652	32	36	40	40	37.2024	-0.470896	0.40416	-1.16503	0.244006	0.450237	N	NA
MCL1	NM_182763	254	327	419	502	24	28	37	30	30.169	-0.593658	0.448595	-1.32311	0.1858	0.37705	N	NA
MCL1	NM_182763	479	556	638	716	26	18	30	19	23.4076	-0.40688	0.505618	-0.804702	0.420991	0.612933	N	NA
ARHGEF2	NM_001162383	2453	2527	2689	2775	22	17	14	24	18.9363	-0.194932	0.537548	-0.362577	0.716921	0.83974	N	NA
TMCO1	NM_001256165	182	242	442	525	32	22	16	21	22.0983	0.258575	0.504028	0.512832	0.608069	0.764879	N	NA
TMCO1	NM_001256165	100	242	442	503	26	19	22	19	21.324	-0.129656	0.510938	-0.253779	0.799666	0.893358	N	NA
PRRC2C	NM_015172	1524	1587	1742	1800	46	40	18	26	31.2358	0.668177	0.438385	1.52264	0.127849	0.302631	N	NA
PRRC2C	NM_015172	1719	1799	1928	2014	32	25	22	24	25.3113	0.0396422	0.472607	0.083877	0.933154	0.96206	N	NA
IER5	NM_016545	875	950	1090	1178	16	20	24	46	26.8406	-1.10708	0.485288	-2.27719	0.0227748	0.0961118	N	NA
IER5	NM_016545	1087	1191	1355	1414	10	16	25	34	21.8386	-1.30032	0.52412	-2.4731	0.0133947	0.0681479	N	NA
IER5	NM_016545	520	601	758	837	11	10	22	39	21.0337	-1.61554	0.539014	-2.97895	0.00289241	0.0221714	Y	arsenite
GLUL	NM_002065	2726	2776	2925	3005	27	27	3	6	14.6211	2.00131	0.639624	3.06095	0.00220634	0.0181868	Y	control
GLUL	NM_002065	1005	1072	1339	1399	21	20	7	10	13.8436	0.888161	0.610808	1.44888	0.14737	0.326174	N	NA
NUCKS1	NM_022731	88	156	297	377	16	20	20	14	17.5505	-0.168649	0.558707	-0.301943	0.762696	0.871564	N	NA
NUCKS1	NM_022731	299	417	508	585	8	17	19	20	16.3464	-0.787614	0.585673	-1.34357	0.179088	0.370066	N	NA
G0S2	NM_015714	251	355	491	585	17	16	54	63	39.1297	-1.97227	0.418479	-4.68603	2.78553788675794e-06	0.000114272	Y	arsenite
G0S2	NM_015714	497	593	657	724	2	7	22	28	15.5846	-2.32026	0.641151	-3.53597	0.000406282	0.00592298	Y	arsenite
PYCR2	NM_013328	1213	1278	1476	1554	38	19	24	35	28.561	-0.294996	0.467666	-0.630677	0.528252	0.700102	N	NA
PYCR2	NM_001271681	1044	1099	1267	1350	35	18	20	23	23.4673	0.0248126	0.500787	0.0495416	0.960488	0.976726	N	NA
PYCR2	NM_001271681	888	961	1258	1345	10	11	19	18	14.8492	-0.954861	0.593088	-1.60668	0.108125	0.272086	N	NA
PARP1	NM_001618	431	513	632	703	25	25	8	6	15.1656	1.37265	0.605703	2.24852	0.024543	0.101868	N	NA
ARF1	NM_001658	179	231	392	441	18	26	5	16	15.561	0.740026	0.609362	1.21146	0.225719	0.428139	N	NA
ARF1	NM_001658	338	425	564	635	24	20	5	7	13.1493	1.39021	0.636251	2.16404	0.0304611	0.117319	N	NA
RNF187	NM_001010858	415	523	668	754	14	23	13	24	18.3393	-0.208846	0.55754	-0.374581	0.707972	0.833131	N	NA
RNF187	NM_001010858	268	346	466	537	18	24	8	23	17.7358	0.190432	0.574673	0.331225	0.740474	0.857993	N	NA
LINC01347	NR_029401	1572	1662	1741	1839	15	11	27	11	16.4711	-0.74686	0.599864	-1.24414	0.213447	0.410669	N	NA
LINC01347	NR_029401	1805	1897	2381	2514	9	8	23	21	15.845	-1.45107	0.589943	-2.44506	0.0144829	0.0715623	N	NA
HNRNPU	NM_031844	413	492	741	842	195	185	199	192	192.434	-0.304143	0.199829	-1.52202	0.128003	0.302631	N	NA
HNRNPU	NM_031844	109	202	389	475	154	172	180	220	182.102	-0.542531	0.206728	-2.62428	0.00868325	0.0490938	Y	arsenite
HNRNPU	NM_031844	34	91	570	644	28	32	34	49	35.9373	-0.678931	0.414019	-1.63922	0.101168	0.26033	N	NA
HNRNPU	NM_031844	2018	2098	2254	2336	21	28	19	26	23.2839	-0.114441	0.495554	-0.230945	0.817357	0.89767	N	NA
HNRNPU	NM_004501	99	189	410	478	209	212	252	296	243.647	-0.63235	0.179836	-3.5161	0.000437935	0.00624455	Y	arsenite
HNRNPU	NM_004501	433	516	680	768	209	163	219	221	203.416	-0.506144	0.197322	-2.56499	0.0103178	0.0572344	N	NA
HNRNPU	NM_004501	2190	2279	2387	2457	24	18	7	16	15.5423	0.550125	0.590457	0.930206	0.352264	0.556805	N	NA
HNRNPU	NM_004501	1607	1697	1900	1988	19	10	11	18	14.2359	-0.230259	0.605132	-0.380394	0.703653	0.830419	N	NA
HNRNPLL	NM_138394	139	181	420	486	29	17	6	11	14.8251	1.02954	0.608526	1.68402	0.0921786	0.244562	N	NA
HNRNPLL	NM_138394	246	351	504	599	13	17	13	15	14.4158	-0.135557	0.594128	-0.228193	0.819496	0.89767	N	NA
UBR3	NM_172070	201	289	423	527	8	9	18	24	15.1778	-1.3712	0.5971	-2.28411	0.0223649	0.0952938	N	NA
RAB10	NM_016131	462	554	641	749	20	18	5	9	12.3198	1.02164	0.642545	1.5815	0.113765	0.282983	N	NA
XPO1	NM_003400	141	212	378	455	25	28	16	16	20.7371	0.42728	0.516932	0.826114	0.408739	0.60185	N	NA
ANKRD36C	NM_001310154	3727	3822	3991	4079	28	14	44	37	31.526	-1.15145	0.457006	-2.51529	0.0118935	0.0630034	N	NA
ANKRD36C	NM_001310154	3682	3758	4257	4329	24	6	24	22	19.1554	-0.812036	0.57699	-1.40554	0.159861	0.345185	N	NA
ANKRD36C	NM_001310154	4038	4128	4347	4434	20	4	17	20	15.2793	-0.792212	0.627275	-1.26086	0.207361	0.401519	N	NA
ANKRD36C	NM_001310154	194	263	404	488	14	15	15	15	14.7382	-0.275812	0.58688	-0.469997	0.638357	0.788175	N	NA
POTEE	NM_001083538	214	288	365	460	16	15	21	42	23.77	-1.16024	0.508215	-2.27763	0.0227487	0.0961118	N	NA
POTEE	NM_001083538	2234	2293	2424	2501	11	9	18	15	13.5393	-0.870845	0.613734	-1.41639	0.156661	0.340753	N	NA
CFLAR	NM_001308043	4088	4172	4539	4618	31	26	40	31	32.3315	-0.558558	0.435096	-1.28352	0.199308	0.389778	N	NA
CAB39	NM_016289	86	158	265	347	23	9	13	20	15.9513	-0.278214	0.591358	-0.470297	0.638143	0.788175	N	NA
CAB39	NM_016289	163	251	331	406	14	21	7	12	13.0766	0.557834	0.627771	0.887192	0.374975	0.571206	N	NA
PPM1G	NM_177983	874	971	1083	1143	17	23	2	8	11.7318	1.48003	0.683453	2.13861	0.0324674	0.122377	N	NA
PPM1G	NM_177983	1080	1140	1248	1323	17	16	3	14	11.8883	0.618639	0.668778	0.922636	0.356197	0.559013	N	NA
RTN4	NM_020532	218	300	436	506	44	41	36	53	43.1211	-0.30508	0.379095	-0.804717	0.420983	0.612933	N	NA
RTN4	NM_020532	377	441	683	757	18	26	47	55	37.6513	-1.38524	0.41839	-3.30364	0.000954389	0.0105883	Y	arsenite
RTN4	NM_153828	210	288	438	513	34	32	30	39	33.5325	-0.303356	0.419232	-0.723569	0.469331	0.649333	N	NA
RTN4	NM_153828	384	461	708	772	16	17	37	53	31.6791	-1.58987	0.450492	-3.51551	0.000438907	0.00624455	Y	arsenite
RTN4	NM_207520	221	300	448	535	36	29	32	31	31.8016	-0.211841	0.43001	-0.492656	0.622255	0.775367	N	NA
RTN4	NM_207520	383	461	683	759	17	14	35	41	27.5558	-1.44732	0.470562	-3.06496	0.00217698	0.0180689	Y	arsenite
RTN4	NM_207520	167	228	339	421	12	18	16	21	16.8311	-0.491169	0.565771	-0.867933	0.385431	0.581069	N	NA
LINC01873	NR_130931	817	917	1035	1101	25	21	32	34	28.2931	-0.736024	0.453353	-1.62254	0.104688	0.265711	N	NA
LINC01873	NR_130931	391	457	984	1081	20	16	20	9	16.1969	0.0158628	0.589881	0.0268999	0.97854	0.986368	N	NA
RPL31	NM_001099693	339	434	712	764	36	37	16	7	22.9581	1.2568	0.530459	2.35984	0.0182826	0.0829064	N	NA
RANBP2	NM_006267	4926	4986	5087	5161	15	21	16	7	14.6328	0.319537	0.616535	0.518298	0.60425	0.764084	N	NA
WASH2P	NR_024077	1354	1459	1723	1782	18	10	10	27	16.0164	-0.569849	0.598214	-0.951689	0.341254	0.547203	N	NA
WASH2P	NR_024077	1025	1102	1383	1461	12	11	8	21	12.8528	-0.491606	0.634944	-0.773664	0.43913	0.627735	N	NA
SMPD4	NR_033230	53	125	299	362	23	27	6	9	15.3894	1.30788	0.600698	2.16166	0.030644	0.117319	N	NA
LOC440910	NR_030728	1146	1233	1331	1412	10	8	38	35	23.9686	-2.08762	0.522237	-3.95352	7.70098649783382e-05	0.00150939	Y	arsenite
LOC440910	NR_030728	1001	1082	1361	1424	5	6	27	33	18.7163	-2.38325	0.588794	-3.96161	7.44457416776007e-05	0.00147553	Y	arsenite
LOC440910	NR_030728	879	953	1101	1195	8	19	15	14	14.1355	-0.305166	0.619883	-0.492447	0.622403	0.775367	N	NA
BBS5	NM_152384	2400	2467	2678	2751	338	338	219	283	288.478	0.172883	0.1704	1.01456	0.310316	0.522825	N	NA
BBS5	NM_152384	2363	2454	2593	2649	335	287	197	216	252.348	0.323187	0.176212	1.83402	0.0666506	0.199952	N	NA
BBS5	NM_152384	1757	1882	2097	2146	81	94	72	85	82.2372	-0.0957253	0.28749	-0.332976	0.739152	0.857333	N	NA
BBS5	NM_152384	2551	2629	2678	2783	62	64	51	53	56.8071	0.0146058	0.333806	0.0437562	0.965099	0.976726	N	NA
BBS5	NM_152384	1855	1892	2732	2790	18	14	20	24	19.1021	-0.656673	0.53256	-1.23218	0.21788	0.41594	N	NA
BBS5	NM_152384	2234	2327	2629	2658	13	11	10	18	12.8867	-0.409707	0.621821	-0.658581	0.510165	0.683838	N	NA
ATP5MC3	NM_001190329	418	495	1149	1195	31	24	6	4	15.1365	1.88441	0.627232	2.95216	0.00315559	0.0232906	Y	control
NCL	NM_005381	515	586	707	810	64	77	13	27	42.6906	1.49448	0.413695	3.59944	0.0003189	0.00468783	Y	control
NCL	NM_005381	1869	1949	2118	2201	50	44	18	13	29.7444	1.23644	0.462412	2.66528	0.00769231	0.0453473	Y	control
NCL	NM_005381	188	264	489	573	43	53	13	12	28.6597	1.55927	0.478931	3.23698	0.00120803	0.0122562	Y	control
NCL	NM_005381	806	894	991	1065	24	31	4	5	14.9564	2.02474	0.637121	3.10906	0.00187681	0.0161497	Y	control
PTMA	NM_001099285	52	134	343	409	115	126	22	32	69.1923	1.84201	0.334218	5.49102	3.99608547814092e-08	2.93712282643357e-06	Y	control
PTMA	NM_001099285	351	419	576	656	80	46	23	19	39.6725	1.23036	0.42174	2.91033	0.00361053	0.0258391	Y	control
PTMA	NM_001099285	9	80	165	262	24	19	2	5	11.5342	1.95181	0.693482	2.74231	0.00610084	0.0387118	Y	control
PTMA	NM_002823	185	262	409	488	142	140	46	39	87.0795	1.42478	0.293561	4.84595	1.26009165808018e-06	6.17444912459289e-05	Y	control
PTMA	NM_002823	33	108	303	361	136	155	26	27	80.4865	2.13028	0.321144	6.60285	4.0333151174091095e-11	5.08197704793547e-09	Y	control
CLASP2	NM_001207044	1547	1677	1719	1778	10	11	21	9	13.1428	-0.691735	0.641025	-1.0785	0.28081	0.491417	N	NA
NUP210	NM_024923	57	146	311	391	13	14	8	15	12.255	-0.00960502	0.633146	-0.0151675	0.987899	0.992399	N	NA
RPL14	NM_003973	126	209	343	409	29	25	5	9	15.9216	1.49042	0.598541	2.46644	0.0136462	0.068581	N	NA
MAP4	NM_002375	4616	4695	4870	4941	15	8	16	12	12.8241	-0.494488	0.629704	-0.784948	0.432484	0.622777	N	NA
PLXNA1	NM_032242	5792	5856	6064	6174	19	16	11	16	15.1488	0.105168	0.581391	0.180848	0.856487	0.921808	N	NA
CDV3	NM_001282762	167	227	416	501	26	19	8	10	14.9768	0.93238	0.595006	1.56131	0.118451	0.290117	N	NA
CDV3	NM_017548	191	267	432	506	42	34	13	15	24.7059	1.08631	0.489967	2.21031	0.0270837	0.107846	N	NA
CDV3	NM_017548	357	430	591	707	36	24	17	26	24.9963	0.204332	0.482695	0.42319	0.672157	0.81014	N	NA
CDV3	NM_017548	167	272	604	700	18	12	13	10	13.0412	0.0888365	0.619781	0.143336	0.886024	0.940968	N	NA
CDV3	NM_001134422	361	431	590	706	40	26	16	26	26.044	0.364587	0.478262	0.761907	0.446115	0.634033	N	NA
CDV3	NM_001134422	187	260	433	506	42	33	12	15	24.179	1.11597	0.495655	2.24399	0.0248329	0.102349	N	NA
CDV3	NM_001134422	174	273	610	700	18	10	13	10	12.5675	-0.00156816	0.631508	-0.00248333	0.998019	0.998585	N	NA
VHL	NM_000551	207	298	376	446	13	14	17	33	19.4385	-1.02007	0.545101	-1.8675	0.0618322	0.191019	N	NA
SLC6A6	NM_003043	234	317	544	618	22	23	8	8	14.5521	1.07928	0.604212	1.77761	0.0754674	0.217524	N	NA
SLC6A6	NR_103507	233	315	555	628	19	20	9	6	12.9755	0.955423	0.63188	1.50615	0.132028	0.308065	N	NA
MRPS25	NR_135246	379	472	562	749	11	20	15	14	15.0203	-0.137835	0.596627	-0.231095	0.817241	0.89767	N	NA
NBEAL2	NM_015175	2562	2656	2785	2853	11	14	15	12	13.0912	-0.328347	0.618811	-0.530701	0.595626	0.758329	N	NA
MCM2	NM_004526	184	254	403	491	16	17	10	13	13.6855	0.234296	0.604145	0.38767	0.69826	0.827037	N	NA
MCM2	NR_073375	389	523	542	623	20	23	13	19	18.365	0.160845	0.542023	0.296691	0.766702	0.874205	N	NA
SEC61A1	NM_013336	2836	2912	3033	3161	22	17	17	16	17.774	-0.0276276	0.546603	-0.0505467	0.959687	0.976726	N	NA
RPN1	NM_002950	67	123	249	346	19	19	4	14	13.3209	0.730932	0.63704	1.14407	0.252594	0.459144	N	NA
H1FX	NM_006026	881	965	1115	1225	25	23	41	45	34.1719	-1.04323	0.421546	-2.47178	0.0134441	0.0681479	N	NA
H1FX	NM_006026	692	763	885	964	31	20	32	48	32.909	-0.855339	0.435424	-1.9627	0.0496805	0.16473	N	NA
H1FX	NM_006026	210	293	439	496	17	8	15	19	14.7445	-0.630077	0.599182	-1.05054	0.293469	0.506535	N	NA
CHST2	NM_004267	494	575	705	775	18	24	13	19	18.1698	0.133041	0.547623	0.242912	0.808074	0.897413	N	NA
CHST2	NM_004267	155	254	460	531	18	27	6	12	15.0716	0.95341	0.607017	1.56471	0.117651	0.288676	N	NA
CHST2	NM_004267	539	678	896	983	21	17	4	11	12.517	0.941394	0.646005	1.45045	0.146933	0.326174	N	NA
TSC22D2	NM_014779	473	573	746	823	11	9	21	21	15.9338	-1.18907	0.580934	-2.03955	0.0413954	0.144884	N	NA
TSC22D2	NR_130136	564	649	788	831	12	11	17	15	13.9389	-0.656075	0.602922	-1.08732	0.276896	0.485531	N	NA
SERP1	NM_014445	283	372	468	551	31	29	14	15	21.4358	0.720235	0.511493	1.40595	0.159739	0.345185	N	NA
SERP1	NM_014445	211	280	467	553	24	22	7	21	17.7599	0.430687	0.571358	0.752985	0.451459	0.637609	N	NA
TERC	NR_001566	169	244	321	398	19	24	23	30	24.081	-0.510118	0.487596	-1.04596	0.295582	0.508689	N	NA
TERC	NR_001566	15	49	179	275	11	14	17	43	21.5471	-1.345	0.547033	-2.44988	0.0142904	0.0710091	N	NA
EIF4A2	NM_001967	182	246	386	498	23	15	6	8	12.2933	1.00774	0.643264	1.5586	0.119092	0.290163	N	NA
LINC02043	NR_125409	1043	1114	1247	1343	178	164	198	171	178.163	-0.375935	0.213324	-1.76227	0.0780233	0.221759	N	NA
LINC02043	NR_125409	681	730	947	1022	79	83	62	64	70.9642	0.0982966	0.303636	0.323731	0.746142	0.861437	N	NA
LINC02043	NR_125409	1497	1593	1659	1752	39	44	52	65	50.4412	-0.720375	0.35556	-2.0254	0.0428258	0.148932	N	NA
LINC02043	NR_125409	925	976	1092	1175	45	51	47	38	45.0852	-0.0882295	0.378423	-0.233172	0.815628	0.89767	N	NA
SDHAP2	NR_003265	253	377	521	555	74	50	91	87	76.3232	-0.774014	0.303607	-2.54874	0.0108113	0.0593259	N	NA
SDHAP2	NR_003265	845	922	1105	1215	21	18	33	48	30.5655	-1.22623	0.448796	-2.72656	0.00639991	0.0401214	Y	arsenite
SDHAP2	NR_003265	48	128	214	377	8	11	17	17	13.583	-0.957516	0.615355	-1.55264	0.120509	0.292807	N	NA
BMP2K	NM_198892	31	130	250	323	15	15	14	14	14.41	-0.145244	0.591062	-0.245764	0.805865	0.897413	N	NA
MRFAP1	NM_033296	760	829	1000	1087	12	13	15	10	12.5622	-0.238198	0.629614	-0.378443	0.705101	0.830861	N	NA
MRFAP1	NM_001272053	641	709	869	961	14	13	17	16	15.0986	-0.494757	0.582658	-0.848893	0.395941	0.587418	N	NA
LOC93622	NR_015433	157	270	365	437	20	19	14	20	17.9617	-0.0503684	0.543708	-0.0926343	0.926194	0.959448	N	NA
RPL9	NM_001024921	288	343	560	636	19	17	10	9	13.3172	0.570256	0.614111	0.927253	0.353795	0.557286	N	NA
RPL9	NM_000661	131	181	401	473	23	21	13	12	16.7609	0.491166	0.561915	0.873316	0.382491	0.579153	N	NA
RPL9	NM_000661	193	261	359	450	20	17	8	9	12.9531	0.745914	0.622137	1.1958	0.231775	0.437509	N	NA
HNRNPD	NM_002138	46	111	263	342	37	28	39	33	34.3192	-0.400142	0.421562	-0.949144	0.342547	0.547464	N	NA
HNRNPD	NM_002138	306	372	484	545	26	17	15	24	20.0903	-0.107177	0.526628	-0.203486	0.838755	0.907708	N	NA
HNRNPD	NM_031369	77	153	232	325	27	24	26	23	24.9007	-0.197492	0.477455	-0.413668	0.679117	0.816051	N	NA
HNRNPD	NM_031369	41	86	354	403	12	6	19	18	14.097	-1.15107	0.61475	-1.86536	0.0621309	0.191606	N	NA
HNRNPD	NM_031370	44	102	260	341	33	22	37	32	31.2	-0.568333	0.441816	-1.28603	0.198434	0.388716	N	NA
HNRNPD	NM_031370	314	386	484	557	17	11	9	14	12.4444	0.0206855	0.628699	0.0328931	0.97376	0.983235	N	NA
HNRNPD	NM_001003810	74	153	230	323	27	23	27	23	24.9539	-0.253081	0.478294	-0.529166	0.59669	0.758329	N	NA
HNRNPD	NM_001003810	42	90	355	420	14	8	18	21	15.4748	-0.970899	0.587134	-1.64979	0.0989858	0.256404	N	NA
RPS3A	NM_001006	156	230	790	837	21	17	3	13	12.7351	0.866394	0.654283	1.31878	0.187242	0.37705	N	NA
RPS3A	NM_001006	236	308	564	610	20	24	3	4	11.8905	1.98841	0.686379	2.82175	0.00477627	0.0317579	Y	control
HMGB2	NM_002129	444	518	693	767	13	19	9	11	12.713	0.372587	0.62746	0.5934	0.552914	0.716635	N	NA
HMGB2	NM_001130689	388	451	621	689	17	23	10	15	15.8306	0.386118	0.579528	0.665794	0.505543	0.678674	N	NA
HMGB2	NM_001130688	401	461	634	707	13	22	10	14	14.4758	0.266761	0.603971	0.441528	0.658831	0.799847	N	NA
LARP1	NM_015315	567	646	765	848	23	23	16	29	22.4237	-0.195744	0.504391	-0.388045	0.697983	0.827037	N	NA
SMA5	NR_034021	651	745	1023	1083	44	57	70	68	60.5832	-0.685585	0.335386	-2.0438	0.0409737	0.144449	N	NA
SMA5	NR_034021	418	496	829	871	31	24	63	60	45.8966	-1.36907	0.379529	-3.60079	0.000317251	0.00468783	Y	arsenite
SMA5	NR_034021	578	651	809	863	21	19	32	44	29.496	-1.10574	0.451828	-2.4432	0.0145575	0.0717304	N	NA
DIAPH1	NM_001314007	5118	5188	5428	5479	15	19	10	13	13.9432	0.275975	0.603043	0.457446	0.647351	0.791054	N	NA
DIAPH1	NM_005219	5066	5135	5374	5426	15	19	10	10	13.181	0.442805	0.617303	0.716713	0.473551	0.65218	N	NA
DIAPH1	NM_001079812	5043	5108	5345	5398	16	21	15	12	15.829	0.169498	0.578649	0.292934	0.769573	0.874755	N	NA
HNRNPH1	NM_001257293	1255	1325	1447	1515	17	10	24	6	14.5259	-0.40371	0.64914	-0.622067	0.533898	0.704937	N	NA
GOLPH3	NM_022130	136	202	357	447	10	16	9	16	12.6248	-0.153867	0.63304	-0.243063	0.807957	0.897413	N	NA
LOC441081	NR_073404	3512	3572	4375	4445	84	82	91	121	94.7001	-0.594596	0.26866	-2.21296	0.0269005	0.107846	N	NA
LOC441081	NR_073404	2146	2193	2958	3022	67	73	103	113	90.3448	-0.86462	0.275858	-3.13344	0.00172771	0.0153928	Y	arsenite
LOC441081	NR_073404	2823	2907	4496	4561	63	63	90	94	78.5146	-0.788387	0.291357	-2.70525	0.0068254	0.0413746	Y	arsenite
LOC441081	NR_073404	1877	1972	4462	4489	80	73	66	89	76.3234	-0.267701	0.293677	-0.911534	0.362014	0.562637	N	NA
LOC441081	NR_073404	2884	2957	3483	3562	48	46	88	100	72.1926	-1.22531	0.305559	-4.0066	6.16000235537305e-05	0.00124899	Y	arsenite
LOC441081	NR_073404	1886	2008	2824	2867	64	72	59	63	63.9948	-0.099011	0.318876	-0.31051	0.756173	0.867395	N	NA
LOC441081	NR_073404	2917	3000	3819	3874	59	52	64	64	59.8823	-0.457241	0.326347	-1.401	0.161213	0.345833	N	NA
LOC441081	NR_073404	3075	3135	4022	4097	52	53	24	37	40.1457	0.507973	0.394895	1.28571	0.198545	0.388716	N	NA
LOC441081	NR_073404	447	517	637	726	37	30	27	51	35.8854	-0.441119	0.421942	-1.04523	0.295917	0.508769	N	NA
LOC441081	NR_073404	2380	2489	3332	3415	35	39	32	36	35.2243	-0.128389	0.411612	-0.311933	0.755092	0.867176	N	NA
LOC441081	NR_073404	1886	2017	3643	3688	31	42	38	28	34.7787	-0.114356	0.430894	-0.265435	0.790674	0.888285	N	NA
LOC441081	NR_073404	1883	1932	3451	3511	14	18	23	30	21.58	-0.895197	0.51369	-1.74051	0.0817687	0.227508	N	NA
LOC441081	NR_073404	2405	2513	4193	4340	19	26	16	23	20.7459	-0.0350125	0.520304	-0.0672935	0.946348	0.970557	N	NA
LOC441081	NR_073404	993	1063	1193	1273	27	17	14	21	19.2541	0.0621112	0.535307	0.116004	0.907649	0.950286	N	NA
LOC441081	NR_073404	4328	4398	4508	4580	11	14	17	23	16.4659	-0.828087	0.570031	-1.45077	0.146843	0.326174	N	NA
LOC441081	NR_073404	1463	1535	1686	1792	18	12	13	11	13.2953	0.038089	0.613688	0.0620668	0.95051	0.973423	N	NA
BTF3	NM_001037637	58	135	376	454	63	49	42	32	45.5248	0.305546	0.378607	0.806931	0.419706	0.612933	N	NA
RPS23	NM_001025	229	311	409	503	23	29	6	7	15.355	1.52718	0.609038	2.48211	0.0130605	0.0669732	N	NA
SKP1	NM_006930	571	636	1322	1383	20	12	11	7	12.1309	0.464181	0.644399	0.719654	0.471738	0.651641	N	NA
PITX1	NM_002653	354	446	569	652	16	15	13	14	14.336	-0.0561787	0.59154	-0.0949764	0.924334	0.959323	N	NA
HNRNPA0	NM_006805	495	571	835	921	12	12	41	41	27.7425	-1.88571	0.48291	-3.87738	0.000105588	0.00198751	Y	arsenite
EGR1	NM_001964	225	308	438	521	22	20	95	104	63.4655	-2.41241	0.351588	-6.81764	9.25480522620367e-12	1.3604563682519401e-09	Y	arsenite
EGR1	NM_001964	15	97	451	518	15	16	74	101	54.153	-2.62083	0.388301	-6.68385	2.3274358731913798e-11	3.158151446392e-09	Y	arsenite
EGR1	NM_001964	1675	1737	1911	1979	13	15	63	64	40.8934	-2.30554	0.424434	-5.38526	7.23416938703089e-08	4.72375446215192e-06	Y	arsenite
EGR1	NM_001964	1135	1231	1307	1408	11	11	64	52	36.7554	-2.49297	0.457827	-5.37881	7.49802295579669e-08	4.72375446215192e-06	Y	arsenite
EGR1	NM_001964	467	534	788	857	12	9	48	37	28.046	-2.11338	0.497108	-4.21038	2.54938765482514e-05	0.000624864	Y	arsenite
EGR1	NM_001964	1891	1956	2057	2123	5	7	25	34	18.6271	-2.25063	0.585644	-3.77487	0.00016009	0.00263924	Y	arsenite
EGR1	NM_001964	2250	2340	2690	2774	6	3	13	33	14.1611	-2.18891	0.663497	-3.22834	0.0012451	0.0124793	Y	arsenite
HSPA9	NM_004134	2074	2135	2208	2301	13	20	9	13	13.458	0.299132	0.616961	0.48461	0.627953	0.780627	N	NA
NPM1	NM_199185	210	278	536	622	20	19	13	5	13.8608	0.714014	0.628858	1.13357	0.256977	0.464382	N	NA
NPM1	NM_001037738	676	775	863	920	26	26	5	6	14.7483	1.71888	0.622129	2.7235	0.00645946	0.0401214	Y	control
NPM1	NM_002520	689	776	870	933	28	30	6	6	16.4177	1.76596	0.600669	2.89976	0.00373449	0.0262456	Y	control
NPM1	NM_002520	209	286	498	569	19	20	7	6	12.3954	1.13167	0.642989	1.74928	0.080243	0.224631	N	NA
RAB24	NR_109790	178	264	434	499	17	10	8	17	12.6797	-0.122032	0.633206	-0.192647	0.847235	0.9145	N	NA
MXD3	NM_001142935	1651	1741	1986	2040	41	26	9	5	18.8944	1.74872	0.580263	2.97975	0.00288484	0.0221714	Y	control
RAB24	NM_001031677	259	339	425	510	20	10	13	8	12.4914	0.188744	0.641658	0.294117	0.768669	0.874755	N	NA
DBN1	NM_004395	899	959	1179	1245	25	20	21	29	23.5954	-0.379386	0.488017	-0.777271	0.436999	0.626837	N	NA
DBN1	NM_004395	426	535	642	732	19	22	9	14	15.4817	0.521302	0.58287	0.893261	0.371717	0.570678	N	NA
DDX41	NM_001321732	438	520	797	873	56	38	30	18	34.3702	0.639535	0.441429	1.44783	0.147663	0.326414	N	NA
TMED9	NM_017510	94	191	278	340	27	37	4	7	17.5336	2.01126	0.604153	3.26848	0.00108127	0.0113533	Y	control
TMED9	NM_017510	234	335	572	648	24	18	1	7	11.5155	1.7716	0.70038	2.47934	0.0131625	0.0673004	N	NA
HNRNPAB	NM_031266	170	247	378	448	48	44	14	16	28.9144	1.26387	0.462138	2.7249	0.00643207	0.0401214	Y	control
HNRNPAB	NM_031266	63	133	264	317	31	27	5	5	15.8111	1.9714	0.617554	3.13129	0.00174041	0.0153928	Y	control
HNRNPAB	NM_004499	83	157	302	408	46	38	7	13	24.2688	1.66154	0.514523	3.20282	0.00136089	0.0131181	Y	control
HNRNPAB	NM_004499	226	309	391	457	39	29	17	13	23.5258	0.830147	0.501142	1.65362	0.0982051	0.256263	N	NA
CANX	NM_001746	1782	1840	1976	2048	112	89	34	29	62.4996	1.35221	0.337877	3.99439	6.48596923234093e-05	0.00130014	Y	control
CANX	NM_001746	1650	1705	1833	1913	51	60	19	21	36.0724	1.14896	0.422521	2.71293	0.0066691	0.0409693	Y	control
CANX	NM_001746	295	379	497	581	19	22	15	12	16.7138	0.300814	0.565204	0.532099	0.594657	0.75793	N	NA
CANX	NM_001024649	1723	1781	1922	1991	71	63	23	17	41.2467	1.3954	0.406407	3.42293	0.000619491	0.00780559	Y	control
CANX	NM_001024649	1543	1631	1720	1816	22	29	8	13	17.2434	0.926403	0.570053	1.62003	0.105227	0.266337	N	NA
FKBP5	NM_001145776	21	113	185	256	23	14	11	11	14.2688	0.417585	0.601101	0.694089	0.487627	0.661597	N	NA
MAN1A1	NM_005907	566	635	915	1037	28	32	19	21	24.4729	0.303687	0.482047	0.629827	0.528808	0.700313	N	NA
MAN1A1	NM_005907	202	281	411	512	23	30	17	25	23.3554	0.0833698	0.495992	0.168076	0.866523	0.928079	N	NA
MAN1A1	NM_005907	434	511	693	814	19	8	16	16	14.7043	-0.463792	0.603065	-0.768697	0.442073	0.63041	N	NA
ARID1B	NM_017519	1087	1194	1425	1518	20	17	22	20	19.8084	-0.413539	0.524309	-0.788651	0.430316	0.620668	N	NA
ARID1B	NM_017519	1469	1568	1707	1811	15	15	18	25	18.3649	-0.698898	0.542271	-1.28776	0.197829	0.388176	N	NA
ARID1B	NM_020732	1080	1170	1419	1518	16	15	18	14	15.7862	-0.284606	0.57522	-0.494839	0.620714	0.774904	N	NA
ARID1B	NM_001346813	1544	1645	1772	1884	14	13	20	26	18.5094	-0.927526	0.542693	-1.70625	0.0879608	0.238865	N	NA
ARID1B	NM_001346813	1158	1263	1505	1593	19	17	19	15	17.452	-0.172473	0.552959	-0.311958	0.755072	0.867176	N	NA
ARID1B	NM_001346813	164	247	971	1045	5	14	13	22	13.7557	-0.953651	0.637137	-1.49378	0.135233	0.311425	N	NA
IGF2R	NM_000876	7282	7363	7437	7528	12	9	15	15	12.8851	-0.683104	0.620211	-1.10024	0.271229	0.479407	N	NA
RREB1	NM_001168344	4701	4802	4875	4949	20	20	14	19	17.9445	0.0212058	0.543633	0.0390054	0.968886	0.979436	N	NA
RREB1	NM_001168344	4293	4359	4504	4583	25	8	13	15	14.8761	-0.0413793	0.613209	-0.0674634	0.946213	0.970557	N	NA
RREB1	NM_001168344	5253	5331	5475	5555	15	13	11	13	12.8122	-0.0343146	0.616697	-0.0556422	0.955627	0.975536	N	NA
RREB1	NM_001168344	3627	3665	3925	3995	19	9	16	6	12.4006	0.0306693	0.66141	0.0463835	0.963005	0.976726	N	NA
RREB1	NM_001003700	4656	4732	4878	4958	15	12	14	12	13.1914	-0.191793	0.612853	-0.312989	0.754289	0.867176	N	NA
NUDT3	NM_006703	47	139	255	322	25	26	30	24	26.3566	-0.328289	0.470519	-0.697762	0.485326	0.661303	N	NA
NUDT3	NM_006703	258	335	452	533	27	13	12	8	14.4238	0.616942	0.615176	1.00137	0.316646	0.526946	N	NA
HMGA1	NM_145899	137	226	414	491	25	42	5	8	18.8299	1.87709	0.590213	3.13623	0.00171135	0.0153928	Y	control
HMGA1	NM_145899	213	288	342	467	28	35	3	6	16.7318	2.21677	0.6232	3.46724	0.000525841	0.00687099	Y	control
HMGA1	NM_145901	411	477	549	654	20	26	1	6	12.2922	2.04795	0.696116	2.86146	0.00421699	0.0289446	Y	control
AFDN	NM_001291964	5016	5099	5280	5342	10	5	28	23	17.3089	-1.80956	0.589803	-3.03724	0.00238754	0.0189713	Y	arsenite
AFDN	NM_001291964	4394	4460	4599	4687	14	7	12	21	13.4976	-0.792263	0.622945	-1.26949	0.204266	0.397272	N	NA
AFDN	NM_001207008	4536	4616	4861	4935	15	7	20	12	13.7475	-0.726846	0.627062	-1.15787	0.246918	0.453712	N	NA
LOC105374952	NR_134616	207	275	393	468	21	33	13	11	18.9169	0.821562	0.554522	1.47865	0.139235	0.317014	N	NA
DEK	NM_003472	106	179	301	363	32	27	18	11	21.3221	0.67737	0.523853	1.29155	0.196513	0.387387	N	NA
DEK	NM_003472	73	155	267	324	17	21	14	8	14.7387	0.451335	0.60328	0.747743	0.454615	0.639227	N	NA
HIST1H1C	NM_005319	276	365	503	575	211	186	80	95	136.967	0.905915	0.230051	3.93633	8.2738466648947e-05	0.00160385	Y	control
HIST1H1C	NM_005319	197	257	404	484	163	200	86	79	127.59	0.860173	0.253187	3.39621	0.000683264	0.00814377	Y	control
HIST1H1E	NM_005321	251	327	448	527	172	177	55	67	112.047	1.23478	0.256965	4.80094	1.57924303655768e-06	7.21335327863606e-05	Y	control
HIST1H1E	NM_005321	79	161	348	453	122	121	41	35	75.7932	1.36874	0.310339	4.40333	1.06603110367949e-05	0.0003358	Y	control
HIST1H2AG	NM_021064	47	137	208	279	37	39	3	3	18.8609	2.90451	0.634579	4.33255	1.47389768312215e-05	0.000419348	Y	control
HIST1H2AG	NM_021064	6	90	285	353	26	28	4	4	14.4238	2.12387	0.647432	3.19583	0.00139431	0.0133672	Y	control
HIST1H2BK	NM_080593	180	246	374	445	23	22	6	9	14.2052	1.16294	0.612116	1.8884	0.0589725	0.185102	N	NA
HIST1H1B	NM_005322	243	291	430	505	21	28	3	4	13.0538	2.13588	0.674729	3.07382	0.00211337	0.0177523	Y	control
HIST1H1B	NM_005322	431	510	614	688	16	24	8	8	13.493	0.927349	0.624951	1.47849	0.139278	0.317014	N	NA
TRIM27	NM_006510	516	603	685	783	20	10	11	9	12.1654	0.256967	0.6419	0.40015	0.689046	0.821268	N	NA
GNL1	NM_005275	1390	1464	1630	1675	12	8	5	31	13.8127	-0.899481	0.670691	-1.33785	0.180944	0.372879	N	NA
GNL1	NM_005275	2741	2823	2979	3052	15	10	14	11	12.4637	-0.243237	0.629197	-0.386612	0.699043	0.827037	N	NA
PPP1R10	NM_002714	3002	3089	3229	3326	8	1	24	26	15.5315	-2.34515	0.650833	-3.51548	0.000438959	0.00624455	Y	arsenite
PPP1R10	NR_072994	2927	3023	3199	3267	7	3	36	40	22.8266	-2.83802	0.572901	-4.79898	1.59478899017464e-06	7.21335327863606e-05	Y	arsenite
PPP1R10	NR_072994	2733	2820	2927	3022	1	4	29	27	16.4344	-3.10417	0.671467	-4.33572	1.45284020330911e-05	0.000419348	Y	arsenite
TUBB	NR_120608	827	915	976	1058	18	31	3	3	12.8623	2.28468	0.693647	3.17646	0.00149084	0.0138149	Y	control
PRRC2A	NM_080686	3791	3861	4124	4202	50	54	68	47	55.2533	-0.403745	0.357468	-1.12949	0.258692	0.46612	N	NA
PRRC2A	NM_080686	2802	2873	2982	3094	47	45	42	53	46.4568	-0.291292	0.363602	-0.801114	0.423066	0.614975	N	NA
PRRC2A	NM_080686	4312	4391	4569	4624	35	37	26	39	33.7725	-0.0962436	0.421923	-0.228103	0.819566	0.89767	N	NA
PRRC2A	NM_080686	3076	3156	3363	3435	24	29	24	36	28.1596	-0.397188	0.45854	-0.866105	0.386433	0.581131	N	NA
PRRC2A	NM_080686	1642	1759	1788	1880	28	18	23	25	23.3336	-0.306867	0.492904	-0.622516	0.533603	0.704937	N	NA
PRRC2A	NM_080686	3397	3472	3644	3705	26	26	16	26	23.02	0.0550134	0.495597	0.110991	0.911623	0.952043	N	NA
PRRC2A	NM_080686	1302	1379	1538	1606	18	11	13	21	15.599	-0.433946	0.582145	-0.745072	0.456228	0.639227	N	NA
PRRC2A	NM_080686	5172	5225	5408	5502	16	14	11	12	13.0109	0.104257	0.613684	0.169869	0.865113	0.928079	N	NA
CLIC1	NM_001287593	1253	1332	1433	1494	54	57	37	38	45.5497	0.291553	0.369252	0.789475	0.429835	0.620481	N	NA
CLIC1	NM_001287593	609	694	821	898	32	27	16	20	23.0285	0.417	0.493204	0.844988	0.398117	0.59015	N	NA
CLIC1	NM_001287593	1017	1096	1215	1272	23	18	10	12	15.1802	0.562638	0.584239	0.961667	0.336217	0.541631	N	NA
CLIC1	NM_001288	55	121	201	284	125	98	50	60	79.9557	0.736193	0.291879	2.52109	0.0116993	0.0625381	N	NA
CLIC1	NM_001288	945	1023	1124	1186	46	52	32	34	40.1711	0.296999	0.391287	0.758914	0.447904	0.634621	N	NA
DDAH2	NM_001303007	583	636	859	929	5	3	35	33	20.3262	-2.92984	0.603921	-4.65883	3.18010103170821e-06	0.00012195	Y	arsenite
CLIC1	NM_001287594	794	872	975	1035	47	50	31	35	39.8774	0.283325	0.390582	0.725276	0.468283	0.649015	N	NA
PRRC2A	NM_004638	2840	2910	3010	3119	64	53	47	57	54.4899	-0.0888089	0.338895	-0.262053	0.79328	0.888478	N	NA
PRRC2A	NM_004638	3911	3984	4267	4329	53	45	62	52	53.2997	-0.473669	0.349782	-1.3541	0.175703	0.367663	N	NA
PRRC2A	NM_004638	4347	4438	4610	4670	43	47	30	36	38.2669	0.182379	0.397749	0.458488	0.646602	0.790989	N	NA
PRRC2A	NM_004638	3437	3510	3684	3745	33	35	28	35	32.4307	-0.13689	0.425768	-0.321521	0.747815	0.862751	N	NA
PRRC2A	NM_004638	3107	3196	3406	3472	28	28	24	36	28.7867	-0.327926	0.450723	-0.727492	0.466925	0.648037	N	NA
PRRC2A	NM_004638	1678	1782	1859	1926	33	30	25	23	27.3276	0.115667	0.45879	0.25211	0.800956	0.894232	N	NA
PRRC2A	NM_004638	2650	2740	3403	3482	11	18	15	22	16.5791	-0.528016	0.573342	-0.920638	0.35724	0.559456	N	NA
PRRC2A	NM_004638	1343	1425	1575	1646	17	13	11	21	15.2766	-0.303409	0.586463	-0.517199	0.605017	0.764236	N	NA
PRRC2A	NM_004638	3770	3860	3991	4060	13	18	13	12	13.8904	0.045403	0.605305	0.0750218	0.940197	0.966497	N	NA
PRRC2A	NM_004638	5203	5261	5448	5536	16	14	8	14	12.6489	0.171754	0.624462	0.274916	0.783381	0.882003	N	NA
VARS	NM_006295	3833	3887	4057	4149	23	26	12	13	17.9091	0.642702	0.550346	1.16616	0.243551	0.449868	N	NA
VARS	NM_006295	2587	2702	2777	2890	21	17	6	13	13.6052	0.656374	0.617863	1.05989	0.289193	0.503132	N	NA
HSPA1A	NM_005345	894	974	1317	1394	93	86	1196	1691	816.968	-4.22906	0.165613	-25.4514	6.81879364202155e-143	6.01417599226301e-140	Y	arsenite
HSPA1A	NM_005345	1564	1645	1786	1854	113	122	754	957	515.133	-3.09477	0.16098	-19.1934	4.2056121718524e-82	1.2364499785246099e-79	Y	arsenite
HSPA1A	NM_005345	258	342	855	938	32	38	585	830	396.459	-4.51733	0.22534	-19.8499	1.10512669563698e-87	3.89888698220728e-85	Y	arsenite
HSPA1A	NM_005345	1362	1456	1698	1781	44	41	525	716	353.396	-4.06547	0.214055	-18.859	2.4771919055927698e-79	6.2425236020937795e-77	Y	arsenite
HSPA1A	NM_005345	483	552	648	737	20	8	104	154	75.5048	-3.30986	0.378049	-8.62065	6.6576568029248595e-18	1.30490073337327e-15	Y	arsenite
HSPA1B	NM_005346	854	933	1381	1466	82	79	1306	1851	885.489	-4.50669	0.168393	-26.6552	1.55821937797927e-156	2.74869898275542e-153	Y	arsenite
HSPA1B	NM_005346	350	444	688	778	45	40	713	968	471.927	-4.5025	0.205802	-21.7001	2.04776411663644e-104	1.20408530058223e-101	Y	arsenite
HSPA1B	NM_005346	1352	1446	1705	1757	44	37	597	801	394.927	-4.30599	0.212447	-20.1053	6.62897353437344e-90	2.92337732865869e-87	Y	arsenite
HSPA1B	NM_005346	1529	1598	1680	1775	36	25	219	301	153.689	-3.27571	0.269692	-12.0592	1.73393550302011e-33	3.8233277841593505e-31	Y	arsenite
HSPA1B	NM_005346	196	264	401	502	39	14	161	248	121.444	-2.89149	0.556337	-5.17438	2.28673200994039e-07	1.30122427920479e-05	Y	arsenite
HSPA1B	NM_005346	1984	2036	2211	2264	1	5	50	45	27.3353	-3.68698	0.600147	-5.70892	1.13692553839431e-08	1.11418702762642e-06	Y	arsenite
PBX2	NM_002586	49	108	326	426	14	10	26	15	16.7445	-0.943712	0.582278	-1.61798	0.105668	0.267046	N	NA
RPS18	NM_022551	16	103	176	272	40	50	9	4	24.1085	2.26291	0.552688	4.02085	5.79893127827109e-05	0.00120345	Y	control
RPS18	NM_022551	263	326	428	515	29	24	8	12	17.3171	1.0285	0.565045	1.81305	0.0698234	0.205281	N	NA
RPS10	NM_001203245	350	426	549	619	22	19	5	10	13.2427	1.04042	0.628545	1.6466	0.0996405	0.257495	N	NA
RPS10	NM_001204091	201	279	399	470	23	22	5	11	14.4233	1.09004	0.612644	1.76975	0.0767682	0.220194	N	NA
RPS10	NM_001204091	351	421	510	604	20	16	8	6	11.9541	0.929481	0.647564	1.42948	0.152866	0.335321	N	NA
RPS10	NM_001014	171	230	389	466	32	28	14	13	20.9068	0.806926	0.519372	1.5507	0.120974	0.293129	N	NA
PIM1	NM_001243186	182	273	390	498	64	51	15	16	34.3182	1.52687	0.437849	3.47082	0.000518864	0.00683041	Y	control
PIM1	NM_001243186	45	102	225	327	48	46	17	16	30.2582	1.16471	0.452365	2.56737	0.0102473	0.0570226	N	NA
PIM1	NM_002648	184	280	399	495	58	56	17	17	35.0406	1.39643	0.429823	3.23676	0.00120894	0.0122562	Y	control
PIM1	NM_002648	45	101	220	327	46	43	18	15	29.1517	1.08459	0.459676	2.35357	0.018594	0.0834599	N	NA
RPL7L1	NR_134562	335	443	559	623	25	18	9	13	15.5762	0.627172	0.581901	1.0759	0.281971	0.49296	N	NA
SRF	NM_003131	264	350	584	674	9	16	29	21	19.4801	-1.13702	0.555217	-2.04327	0.0410254	0.144449	N	NA
SRF	NM_003131	379	479	605	678	9	8	20	21	14.9749	-1.35105	0.598219	-2.24662	0.0246646	0.102067	N	NA
GTPBP2	NM_019096	1742	1837	1956	2045	5	12	24	31	18.7591	-1.72117	0.575746	-2.96652	0.00301191	0.0226085	Y	arsenite
GTPBP2	NM_019096	399	483	659	734	13	15	17	25	17.6429	-0.749855	0.553855	-1.35252	0.17621	0.367711	N	NA
VEGFA	NM_001204384	408	486	690	776	10	12	37	56	29.9612	-2.15358	0.48199	-4.42538	9.62706402842787e-06	0.000308766	Y	arsenite
VEGFA	NM_001204384	693	792	955	1039	12	12	34	43	26.2202	-1.7889	0.490645	-3.62247	0.000291809	0.00436229	Y	arsenite
VEGFA	NM_001204384	302	354	944	1063	11	9	20	14	13.8653	-0.913754	0.61353	-1.48649	0.137148	0.313381	N	NA
HSP90AB1	NM_007355	1804	1885	2006	2085	41	32	19	18	26.5187	0.660095	0.469961	1.4031	0.160587	0.345185	N	NA
HSP90AB1	NM_007355	817	918	984	1071	44	35	15	15	25.9548	1.04583	0.479974	2.17312	0.0297711	0.11593	N	NA
EEF1A1	NM_001402	193	263	444	532	149	134	47	50	90.2551	1.25054	0.280693	4.45008	8.58384625682253e-06	0.000280406	Y	control
EEF1A1	NM_001402	1056	1119	1346	1424	130	142	47	33	83.727	1.45209	0.310073	4.67549	2.9324620401877e-06	0.000117565	Y	control
EEF1A1	NM_001402	410	503	772	867	95	117	36	53	72.1368	0.974901	0.318809	3.05532	0.0022482	0.0184457	Y	control
EEF1A1	NM_001402	751	833	973	1045	73	82	23	16	45.9247	1.63741	0.399189	4.08544	4.39926106363441e-05	0.000946378	Y	control
EEF1A1	NM_001402	1402	1477	1606	1671	50	56	18	20	34.3649	1.15248	0.429748	2.67509	0.00747086	0.0449695	Y	control
EEF1A1	NM_001402	115	178	1486	1559	49	60	12	14	31.8316	1.69185	0.46165	3.64127	0.0002713	0.00409037	Y	control
RPS12	NM_001016	181	248	339	423	24	24	9	7	15.2569	1.15815	0.59775	1.92731	0.0539406	0.175767	N	NA
TNFAIP3	NM_001270508	151	308	356	424	6	4	26	22	15.3739	-2.19215	0.62758	-3.42319	0.00061891	0.00780559	Y	arsenite
EZR	NM_003379	1108	1194	1318	1410	23	19	9	12	15.127	0.656026	0.586426	1.11657	0.264177	0.470241	N	NA
POM121	NM_001257190	120	201	336	433	16	14	16	8	13.4449	0.0292083	0.622927	0.0469051	0.962589	0.976726	N	NA
KMT2C	NM_170606	54	129	302	402	11	14	16	17	14.6515	-0.580994	0.592049	-0.980867	0.326658	0.534098	N	NA
FSCN1	NM_003088	621	696	876	968	42	42	23	8	27.7227	1.05232	0.505937	2.07567	0.0379244	0.136807	N	NA
FSCN1	NM_003088	201	261	373	456	23	25	13	8	16.692	0.817272	0.576884	1.41367	0.15746	0.342069	N	NA
TNRC18	NM_001080495	5976	6047	6202	6283	28	20	52	74	44.6676	-1.57297	0.390413	-4.01806	5.86798641450775e-05	0.00120362	Y	arsenite
TNRC18	NM_001080495	4173	4263	4402	4518	17	19	34	32	26.1634	-1.05718	0.475976	-2.21764	0.0265793	0.107287	N	NA
TNRC18	NM_001080495	4832	4881	5012	5129	21	12	32	37	26.0597	-1.23538	0.483434	-2.54902	0.0108026	0.0593259	N	NA
TNRC18	NM_001080495	999	1075	1240	1314	14	14	33	39	25.8196	-1.49998	0.484901	-3.0808	0.00206448	0.0174246	Y	arsenite
TNRC18	NM_001080495	3747	3819	4036	4122	18	10	15	30	18.2288	-0.84055	0.562451	-1.49211	0.135669	0.312021	N	NA
TNRC18	NM_001080495	2133	2205	2355	2445	12	17	21	21	18.0445	-0.712956	0.551175	-1.29263	0.196141	0.387387	N	NA
ZNF316	NM_001278559	2002	2094	2178	2236	12	11	23	16	15.9333	-0.923183	0.583492	-1.57951	0.11422	0.282983	N	NA
ZNF316	NM_001278559	391	474	676	751	10	8	21	19	14.9728	-1.25402	0.597763	-2.08884	0.0367217	0.133286	N	NA
ZNF316	NM_001278559	2644	2732	2889	2998	13	12	13	16	13.4856	-0.415028	0.60616	-0.684503	0.493657	0.665845	N	NA
ZNF316	NM_001278559	1081	1134	1304	1357	12	12	15	12	12.8335	-0.383948	0.620825	-0.618452	0.536277	0.705439	N	NA
CDK13	NM_031267	766	864	1002	1084	16	12	14	19	15.1858	-0.441836	0.581688	-0.759287	0.447681	0.634621	N	NA
GRB10	NM_001001555	144	237	407	495	36	20	18	22	23.3228	0.197218	0.499726	0.394546	0.693178	0.824522	N	NA
PMS2P9	NR_028058	1153	1248	1266	1388	8	15	17	10	12.752	-0.428808	0.642679	-0.667403	0.504515	0.678326	N	NA
DPY19L2P2	NR_003561	1157	1292	1340	1424	18	20	11	18	16.3883	0.128863	0.567592	0.226984	0.820436	0.89767	N	NA
DPY19L2P2	NR_003561	1154	1234	1435	1478	21	17	14	5	13.8932	0.607678	0.630839	0.962261	0.335918	0.541631	N	NA
DPY19L2P2	NR_027768	1452	1587	1635	1719	18	20	11	18	16.3883	0.128863	0.567592	0.226984	0.820436	0.89767	N	NA
DPY19L2P2	NR_027768	1449	1529	1730	1773	21	17	14	5	13.8932	0.607678	0.630839	0.962261	0.335918	0.541631	N	NA
CCDC71L	NM_175884	246	345	423	498	12	19	31	29	23.4512	-1.11077	0.507007	-2.18675	0.028761	0.113247	N	NA
CCDC71L	NM_175884	205	300	730	788	11	11	36	29	22.7907	-1.67378	0.521555	-3.1898	0.00142374	0.0135025	Y	arsenite
CCDC71L	NM_175884	603	658	865	959	20	15	14	18	16.5063	-0.119327	0.561957	-0.21233	0.83185	0.902044	N	NA
CCDC71L	NM_175884	877	1008	1138	1195	19	12	10	13	13.1492	0.143545	0.615681	0.233067	0.815709	0.89767	N	NA
PRKAR2B	NM_002736	182	260	372	442	8	10	21	22	15.7767	-1.34037	0.588288	-2.26757	0.0233554	0.0982059	N	NA
SND1	NM_014390	227	329	508	596	25	20	19	16	19.7126	0.0804216	0.526589	0.152725	0.878615	0.935089	N	NA
SND1	NM_014390	414	498	778	854	17	27	8	26	18.9925	0.139113	0.573727	0.242386	0.808481	0.897413	N	NA
TRIM24	NM_003852	226	318	424	484	15	23	14	13	16.0507	0.211171	0.57822	0.365191	0.714969	0.838052	N	NA
TRIM24	NM_003852	140	213	504	585	14	6	15	19	13.6228	-0.903145	0.621451	-1.44994	0.147076	0.326174	N	NA
LUC7L2	NM_016019	113	253	381	454	20	19	6	6	12.0845	1.22626	0.649885	1.87251	0.0611355	0.190199	N	NA
RBM33	NM_053043	153	249	373	459	15	7	22	16	15.3438	-0.949378	0.600668	-1.57725	0.114738	0.283869	N	NA
UBE3C	NM_014671	137	205	263	414	24	11	1	21	13.4144	0.266111	0.914077	0.290947	0.771092	0.874755	N	NA
ESYT2	NM_020728	223	299	398	487	14	13	7	17	12.4522	-0.0588797	0.63607	-0.0925386	0.92627	0.959448	N	NA
INTS1	NM_001080453	662	757	931	1013	21	17	9	13	14.4754	0.468552	0.594456	0.787285	0.431115	0.621313	N	NA
EIF3B	NM_003751	258	358	483	575	82	92	42	34	60.321	0.895986	0.340494	2.62934	0.00855513	0.0486814	Y	control
EIF3B	NM_003751	100	212	396	473	62	74	26	51	51.4162	0.557894	0.372192	1.49823	0.134073	0.31126	N	NA
EIF3B	NM_003751	30	125	182	272	28	25	19	15	21.2907	0.336213	0.512849	0.655383	0.512221	0.685038	N	NA
EIF3B	NM_001037283	253	350	469	573	71	92	35	45	58.7094	0.74977	0.343849	2.17917	0.0293188	0.115186	N	NA
EIF3B	NM_001037283	64	153	396	470	47	65	20	37	40.7476	0.699249	0.412072	1.6955	0.0899798	0.242223	N	NA
EIF3B	NM_001037283	30	123	180	263	26	21	19	15	19.9113	0.174118	0.526273	0.33083	0.740773	0.857993	N	NA
FOXK1	NM_001037165	4841	4919	5156	5249	15	21	29	37	26.0252	-1.04144	0.480377	-2.1647	0.0304103	0.117319	N	NA
ACTB	NM_001101	177	250	375	446	198	191	78	78	130.444	1.03646	0.237968	4.35315	1.34194834725984e-05	0.000394533	Y	control
ACTB	NM_001101	1171	1271	1385	1464	139	109	36	49	78.7296	1.2486	0.302138	4.12703	3.67484976812056e-05	0.000820561	Y	control
ACTB	NM_001101	4	63	144	260	46	32	9	11	22.9197	1.54694	0.521461	2.94518	0.00322767	0.0235806	Y	control
HNRNPA2B1	NM_002137	94	186	314	358	18	20	18	15	17.6565	-0.0573008	0.550566	-0.104096	0.917093	0.955169	N	NA
HNRNPA2B1	NM_002137	777	886	1035	1085	7	15	28	16	17.2509	-1.11919	0.59492	-1.87705	0.0605118	0.188591	N	NA
HNRNPA2B1	NM_031243	769	843	975	1078	18	25	45	30	30.4829	-1.00117	0.465197	-2.14995	0.0315588	0.11972	N	NA
HNRNPA2B1	NM_031243	124	211	427	506	23	33	15	18	21.7074	0.470262	0.514915	0.91269	0.361406	0.562187	N	NA
HNRNPA2B1	NM_031243	1294	1385	1507	1566	13	16	7	14	12.1846	0.196479	0.638188	0.307718	0.758297	0.869088	N	NA
PPIA	NM_001300981	624	702	827	898	30	34	7	9	18.8493	1.56362	0.562849	2.75332	0.00589944	0.0377051	Y	control
PPIA	NM_001300981	435	511	662	744	27	35	8	7	18.2201	1.59091	0.575573	2.7382	0.00617767	0.0390588	Y	control
PPIA	NM_021130	284	353	495	582	19	24	2	8	12.4007	1.57619	0.672896	2.31025	0.0208742	0.0909187	N	NA
STAG3L1	NR_040583	483	551	675	803	12	17	9	15	13.0396	0.0291335	0.621866	0.0468459	0.962636	0.976726	N	NA
STAG3L3	NR_040582	152	252	369	418	47	39	39	37	40.1006	-0.0872354	0.389438	-0.224012	0.822748	0.89767	N	NA
NSUN5	NM_018044	1248	1364	1434	1489	32	21	10	7	16.5644	1.2022	0.586329	2.03958	0.0413926	0.144884	N	NA
BUD23	NR_037776	57	145	341	406	27	21	19	14	19.8733	0.237998	0.529283	0.4496	0.652999	0.796054	N	NA
EIF4H	NM_031992	1365	1425	1629	1711	12	15	7	17	12.4939	-0.0526724	0.638016	-0.0825377	0.934219	0.96214	N	NA
PTCD1	NM_015545	2766	2854	4649	4711	18	18	9	6	12.2858	0.849518	0.641518	1.32004	0.186823	0.37705	N	NA
PDAP1	NM_014891	365	452	578	674	18	17	12	9	13.6813	0.406116	0.608952	0.666494	0.505095	0.678589	N	NA
ATP5MF-PTCD1	NM_001198879	2799	2887	4682	4744	18	18	9	6	12.2858	0.849518	0.641518	1.32004	0.186823	0.37705	N	NA
MCM7	NM_001278595	967	1048	1123	1212	41	26	9	9	19.9106	1.46011	0.551234	2.62997	0.00853925	0.0486814	Y	control
MCM7	NM_182776	858	939	1014	1100	39	24	11	9	19.585	1.23831	0.551082	2.23607	0.0253471	0.103919	N	NA
MCM7	NM_182776	1539	1601	1729	1801	17	21	4	10	12.3464	1.0302	0.650904	1.5741	0.115465	0.285265	N	NA
STAG3L5P-PVRIG2P-PILRB	NR_036569	61	157	274	318	13	8	16	13	12.6462	-0.646895	0.629428	-1.02682	0.304505	0.517666	N	NA
STAG3L5P-PVRIG2P-PILRB	NR_036570	61	157	274	318	13	8	16	13	12.6462	-0.646895	0.629428	-1.02682	0.304505	0.517666	N	NA
TFR2	NM_003227	97	154	312	392	21	15	5	13	12.8415	0.650845	0.636395	1.02017	0.307647	0.520815	N	NA
GIGYF1	NM_022574	1185	1260	1457	1526	40	32	44	62	44.7325	-0.779966	0.375851	-2.07419	0.0380615	0.137021	N	NA
GIGYF1	NM_022574	3053	3118	3260	3349	33	27	33	39	33.0024	-0.496788	0.422661	-1.17515	0.239933	0.444115	N	NA
GIGYF1	NM_022574	4673	4769	4934	5012	29	26	40	37	33.4239	-0.7125	0.424112	-1.67926	0.0931018	0.245856	N	NA
GIGYF1	NM_022574	3632	3696	3870	3945	24	28	28	33	28.3207	-0.454206	0.453214	-1.00207	0.31631	0.526946	N	NA
GIGYF1	NM_022574	3138	3202	3498	3608	23	20	26	33	25.6299	-0.665273	0.471929	-1.40893	0.158856	0.344253	N	NA
GIGYF1	NM_022574	2806	2878	3062	3151	28	25	23	21	23.9752	-0.000678181	0.484218	-0.00140065	0.998882	0.998882	N	NA
GIGYF1	NM_022574	2443	2517	2633	2721	23	25	15	24	21.3371	0.0482082	0.511427	0.0942534	0.924908	0.959323	N	NA
GIGYF1	NM_022574	1883	1999	2119	2193	14	21	29	20	21.4902	-0.686278	0.526694	-1.30249	0.192749	0.383558	N	NA
GIGYF1	NM_022574	433	511	1613	1699	15	23	21	18	19.3514	-0.268901	0.539348	-0.498665	0.618015	0.773895	N	NA
SRRT	NM_015908	932	1009	1123	1191	26	24	7	21	18.6656	0.540245	0.561973	0.960029	0.33704	0.542176	N	NA
SRRT	NM_015908	107	190	330	426	26	22	4	7	13.765	1.61026	0.635322	2.50137	0.0123713	0.0647568	N	NA
SRRT	NM_001128854	922	997	1115	1188	25	23	4	17	16.3264	0.847143	0.604	1.39818	0.162058	0.34651	N	NA
TRIP6	NM_003302	632	743	876	972	24	20	7	8	13.9835	1.12465	0.613613	1.82256	0.0683699	0.203038	N	NA
SRRT	NM_001128853	935	1026	1118	1209	39	25	6	25	22.4366	0.730594	0.550226	1.3253	0.18507	0.37705	N	NA
SRRT	NM_001128853	149	249	363	431	37	28	9	13	20.5366	1.18264	0.532893	2.20941	0.027146	0.10785	N	NA
SRRT	NM_001128852	921	997	1110	1188	24	22	4	17	15.8736	0.791252	0.609177	1.29517	0.195263	0.386581	N	NA
TRIM56	NM_030961	1070	1182	1322	1408	11	7	22	21	15.7501	-1.35296	0.59037	-2.28012	0.0226007	0.0958357	N	NA
TRIM56	NM_030961	793	873	1040	1109	13	5	14	20	13.134	-1.02472	0.635059	-1.60836	0.107757	0.271547	N	NA
LOC100289561	NM_001347879	449	594	613	695	20	13	11	9	12.8759	0.384528	0.624032	0.615755	0.538056	0.706725	N	NA
LOC100630923	NR_038967	407	552	571	653	20	12	11	9	12.6391	0.343221	0.629435	0.544949	0.585788	0.749333	N	NA
KMT2E-AS1	NR_024586	1323	1421	1532	1604	9	8	20	14	13.1965	-1.10767	0.627972	-1.75798	0.0787508	0.222094	N	NA
LINC01000	NR_024368	5399	5485	5796	5883	22	15	47	55	35.91	-1.63053	0.427046	-3.80402	0.000142369	0.00244231	Y	arsenite
LINC01000	NR_024368	2536	2608	3169	3247	21	27	32	29	27.5799	-0.566555	0.464183	-1.22031	0.222346	0.422194	N	NA
LINC01000	NR_024368	6463	6551	6718	6788	12	6	39	49	27.7738	-2.34397	0.505483	-4.57439	4.77606314250839e-06	0.000171938	Y	arsenite
LINC01000	NR_024368	5610	5689	5808	5890	5	4	34	25	18.2405	-2.59936	0.613263	-4.11564	3.86101007679577e-05	0.000851353	Y	arsenite
LINC01000	NR_024368	4552	4635	4759	4858	7	8	13	32	15.3072	-1.57897	0.619336	-2.52985	0.0114111	0.0613694	N	NA
LINC01000	NR_024368	5321	5395	5508	5602	10	3	23	24	15.639	-1.85526	0.619806	-2.95729	0.00310355	0.0230998	Y	arsenite
FLNC	NM_001458	6654	6739	6925	7001	7	17	37	38	25.9243	-1.73178	0.512821	-3.35814	0.000784685	0.00904695	Y	arsenite
FLNC	NM_001458	8371	8438	8629	8713	21	18	26	31	24.2161	-0.749055	0.483734	-1.54732	0.121786	0.294541	N	NA
FLNC	NM_001458	6023	6110	6346	6416	10	23	23	37	23.6786	-0.996271	0.523577	-1.90022	0.0574039	0.182123	N	NA
FLNC	NM_001458	1769	1879	1993	2053	10	15	17	33	19.0273	-1.1081	0.556938	-1.98474	0.0471738	0.158203	N	NA
FLNC	NM_001458	2058	2164	2495	2586	12	8	22	26	17.4733	-1.36785	0.566033	-2.40504	0.0161707	0.0762702	N	NA
FLNC	NM_001458	1249	1331	1672	1758	8	9	18	19	13.9075	-1.20772	0.612135	-1.96484	0.0494327	0.164217	N	NA
FLNC	NM_001458	4524	4604	4768	4842	4	6	17	23	13.0592	-1.91205	0.652079	-2.88701	0.00388919	0.0270099	Y	arsenite
FLNC	NM_001127487	1769	1864	1993	2058	18	29	33	59	35.3174	-1.12903	0.442471	-2.54816	0.0108293	0.0593259	N	NA
FLNC	NM_001127487	8275	8340	8521	8606	22	14	32	33	25.7332	-1.04263	0.480517	-2.16625	0.030292	0.117319	N	NA
FLNC	NM_001127487	4496	4584	4731	4805	11	18	33	36	25.3568	-1.38501	0.495429	-2.78666	0.00532543	0.0346644	Y	arsenite
FLNC	NM_001127487	6019	6110	6309	6391	11	22	25	34	23.4757	-0.986146	0.514256	-1.91502	0.0554895	0.179274	N	NA
FLNC	NM_001127487	6531	6612	6809	6903	7	15	35	34	23.8543	-1.73191	0.524773	-3.28009	0.00103774	0.0110276	Y	arsenite
FLNC	NM_001127487	1223	1296	1691	1776	12	11	21	41	21.7046	-1.51856	0.533705	-2.83106	0.00463936	0.031236	Y	arsenite
FLNC	NM_001127487	982	1036	1349	1418	6	1	21	30	15.2456	-2.63469	0.66328	-3.82587	0.00013031	0.00232188	Y	arsenite
FLNC	NM_001127487	2859	2958	3142	3218	12	14	11	20	14.1794	-0.434876	0.602862	-0.721086	0.470857	0.650934	N	NA
FLNC	NM_001127487	255	334	480	562	11	10	11	21	13.2701	-0.741842	0.620386	-1.19403	0.232466	0.438053	N	NA
FLNC	NM_001127487	2158	2226	2582	2652	10	6	19	18	13.665	-1.29092	0.621331	-2.06696	0.0387379	0.139172	N	NA
FLNC	NM_001127487	1716	1809	2393	2469	9	7	12	22	12.6717	-1.15044	0.63755	-1.79679	0.0723696	0.211008	N	NA
KEL	NM_000420	188	262	434	494	8	9	18	15	12.8913	-1.06056	0.628938	-1.68115	0.0927335	0.245618	N	NA
PDIA4	NM_004911	188	250	324	416	21	15	8	9	12.6954	0.705681	0.627614	1.12163	0.262018	0.468762	N	NA
KCNH2	NM_172057	38	132	246	336	41	64	12	23	33.3376	1.26082	0.461393	2.72416	0.00644648	0.0401214	Y	control
KCNH2	NM_172057	1967	2049	2152	2233	39	27	11	14	21.5659	1.03603	0.520066	1.98573	0.047063	0.158132	N	NA
KCNH2	NM_172057	249	337	479	553	31	20	7	8	15.4955	1.31407	0.600116	2.17401	0.029704	0.115925	N	NA
KCNH2	NM_001204798	48	147	266	346	35	42	10	19	25.2347	1.07616	0.495992	2.16319	0.0305269	0.117319	N	NA
KCNH2	NM_001204798	262	363	506	595	22	17	7	6	12.3329	1.12425	0.644064	1.7349	0.0827593	0.22882	N	NA
KCNH2	NM_000238	3081	3167	3253	3332	26	23	3	7	13.7118	1.74851	0.644644	2.66843	0.0076206	0.0452617	Y	control
SLC4A2	NM_001199692	1333	1398	1615	1690	17	19	12	7	13.4309	0.561606	0.621845	0.902155	0.366975	0.567221	N	NA
SLC4A2	NM_001199692	1101	1202	1332	1400	17	20	6	7	11.9274	1.07116	0.650118	1.63817	0.101387	0.26033	N	NA
SLC4A2	NM_001199694	778	843	1060	1135	17	19	12	7	13.4309	0.561606	0.621845	0.902155	0.366975	0.567221	N	NA
TMUB1	NM_001136044	958	1025	1233	1310	14	19	11	7	12.4929	0.521324	0.638374	0.815871	0.414574	0.607399	N	NA
SLC4A2	NM_003040	532	602	846	960	25	26	25	15	22.6198	0.0656277	0.510588	0.128556	0.897709	0.945119	N	NA
SLC4A2	NM_001199693	338	399	657	770	28	25	21	17	22.3789	0.19061	0.501288	0.380216	0.703785	0.830419	N	NA
TMUB1	NM_031434	1412	1479	1698	1772	18	21	11	7	13.8305	0.735555	0.6162	1.19129	0.233539	0.438053	N	NA
RAB11FIP1	NM_001002814	89	196	323	437	6	6	20	19	13.3451	-1.69218	0.636213	-2.63134	0.00850497	0.0486814	Y	arsenite
MCM4	NM_005914	753	813	929	1009	24	20	5	7	13.1493	1.39021	0.636251	2.16404	0.0304611	0.117319	N	NA
UBR5	NM_015902	76	151	373	442	14	15	11	17	14.0861	-0.174164	0.598638	-0.290918	0.771114	0.874755	N	NA
CPSF1	NM_013291	2231	2307	2503	2556	29	30	13	39	27.048	-0.0423453	0.496356	-0.0852955	0.932026	0.961459	N	NA
CPSF1	NM_013291	1220	1274	1687	1749	23	24	11	20	18.9238	0.322363	0.540028	0.596597	0.550776	0.714709	N	NA
RDH10	NM_172037	454	517	659	762	16	16	8	11	12.3604	0.431476	0.628759	0.685482	0.49304	0.665845	N	NA
UQCRB	NM_001254752	298	363	500	553	44	30	16	19	26.0769	0.754125	0.476648	1.57985	0.114142	0.282983	N	NA
UQCRB	NM_001254752	228	363	500	555	20	19	9	15	15.2412	0.400119	0.584099	0.684402	0.493722	0.665845	N	NA
PABPC1	NM_002568	290	383	499	614	39	36	10	15	23.6614	1.22265	0.50319	2.41968	0.0155342	0.0746659	N	NA
PABPC1	NM_002568	1475	1528	1718	1788	31	31	12	12	20.5672	1.00733	0.526419	1.90773	0.0564263	0.180974	N	NA
PABPC1	NM_002568	243	332	675	738	21	26	9	9	15.5907	0.996667	0.58963	1.68393	0.0921962	0.244562	N	NA
MYC	NM_002467	177	265	394	458	31	37	6	1	17.4533	2.54729	0.64584	3.80236	0.000143323	0.00244231	Y	control
MYC	NM_002467	806	871	978	1074	25	21	7	5	13.6742	1.43551	0.631463	2.25155	0.0243505	0.101307	N	NA
MYC	NM_002467	7	76	173	268	25	22	2	2	11.6986	2.61056	0.724605	3.37972	0.000725607	0.00847662	Y	control
SCRIB	NM_182706	1614	1704	1913	1990	16	12	37	34	25.6678	-1.49215	0.489198	-3.03791	0.00238222	0.0189713	Y	arsenite
SCRIB	NM_182706	2213	2283	2581	2673	9	10	20	29	17.4811	-1.44363	0.568882	-2.52403	0.0116018	0.0622053	N	NA
SCRIB	NM_182706	4187	4276	4399	4492	14	17	10	21	15.2859	-0.208505	0.590563	-0.35301	0.724081	0.84644	N	NA
SCRIB	NM_015356	1630	1712	1915	1994	8	9	31	30	20.4728	-1.89886	0.548263	-3.42985	0.000603912	0.00771957	Y	arsenite
EPPK1	NM_031308	8055	8140	14536	14609	17	22	5	12	13.3814	0.834918	0.630085	1.3206	0.186636	0.37705	N	NA
PLEC	NM_201381	5425	5548	5624	5690	23	14	14	20	17.4255	-0.127422	0.555768	-0.22924	0.818683	0.89767	N	NA
PLEC	NM_201381	6128	6182	6399	6477	13	16	14	16	14.723	-0.268994	0.588433	-0.457165	0.647552	0.791054	N	NA
PLEC	NM_201381	7581	7660	7776	7847	10	11	9	28	14.4893	-0.904602	0.624661	-1.44506	0.14844	0.32772	N	NA
PLEC	NM_201381	7554	7638	8118	8183	12	12	17	17	14.6839	-0.678122	0.590232	-1.14795	0.250989	0.458961	N	NA
PLEC	NM_201381	4427	4513	4690	4757	8	7	23	19	14.8841	-1.53897	0.608569	-2.51022	0.0120657	0.0635338	N	NA
PLEC	NM_201381	6887	6945	7112	7195	14	8	13	17	13.0083	-0.621458	0.621442	-0.999009	0.31779	0.527855	N	NA
OPLAH	NM_017570	489	571	808	871	28	15	11	16	16.8559	0.361414	0.569837	0.633744	0.526248	0.698496	N	NA
OPLAH	NM_017570	1560	1648	1849	1921	20	13	8	13	13.022	0.341848	0.621212	0.549782	0.582469	0.746169	N	NA
OPLAH	NM_017570	1204	1275	1538	1619	17	18	6	12	12.724	0.620422	0.630544	0.981859	0.326169	0.534098	N	NA
OPLAH	NM_017570	3528	3588	3785	3860	12	18	3	17	12.0442	0.317698	0.679621	0.46691	0.640564	0.788175	N	NA
TONSL	NM_013432	1314	1403	1523	1600	14	18	19	19	17.6251	-0.456285	0.551789	-0.826825	0.408336	0.601758	N	NA
RECQL4	NM_004260	761	838	1013	1113	37	37	21	20	27.9271	0.548597	0.457682	1.19783	0.230984	0.436715	N	NA
RECQL4	NM_004260	3418	3482	3629	3714	20	25	15	19	19.4188	0.139548	0.530429	0.26306	0.792504	0.888478	N	NA
RECQL4	NM_004260	2860	2928	3083	3140	15	26	9	13	15.311	0.580866	0.597339	0.971105	0.331496	0.537992	N	NA
RPL8	NM_001317782	434	525	648	721	58	53	20	25	37.2327	0.989305	0.409413	2.41224	0.0158548	0.0753758	N	NA
RPL8	NM_001317782	579	649	731	829	27	43	15	13	23.6695	0.976343	0.513419	1.89724	0.0577959	0.182827	N	NA
RPL8	NM_001317782	750	815	915	1013	26	41	5	5	18.0469	2.17435	0.609491	3.49001	0.000482996	0.00655388	Y	control
RPL8	NM_033301	338	422	548	622	48	53	22	28	36.415	0.720698	0.411913	1.74799	0.0804661	0.224631	N	NA
RPL8	NM_033301	610	683	819	912	33	53	8	10	24.5414	1.82692	0.530156	3.41186	0.000645218	0.00790392	Y	control
RPL8	NM_033301	475	549	619	712	19	21	10	6	13.5024	0.90881	0.624906	1.44956	0.147182	0.326174	N	NA
RPL8	NM_001317771	310	399	526	600	42	41	18	22	29.5924	0.745212	0.447795	1.66213	0.0964868	0.252901	N	NA
RPL8	NM_001317771	615	681	790	890	22	39	5	7	17.2173	1.83905	0.609164	2.97589	0.00292141	0.0221714	Y	control
RPL8	NM_001317771	453	523	601	702	16	19	11	5	12.4167	0.72603	0.648444	1.1175	0.263781	0.470241	N	NA
RPL8	NM_000973	266	356	487	558	45	42	20	21	30.8033	0.772165	0.440491	1.75079	0.0799812	0.224304	N	NA
RPL8	NM_000973	572	638	747	847	22	39	5	7	17.2173	1.83905	0.609164	2.97589	0.00292141	0.0221714	Y	control
RPL8	NM_000973	84	171	240	346	24	18	8	5	13.0377	1.21229	0.638529	1.88597	0.0592988	0.185796	N	NA
RPL8	NM_000973	410	480	558	660	15	19	11	5	12.2007	0.689567	0.652826	1.05449	0.291659	0.506384	N	NA
IARS	NM_013417	74	147	317	372	15	10	14	11	12.4637	-0.243237	0.629197	-0.386612	0.699043	0.827037	N	NA
CIZ1	NM_001131017	72	136	269	358	17	12	8	16	12.8993	0.0196548	0.624509	0.0314611	0.974902	0.983825	N	NA
CIZ1	NM_001131016	67	140	290	384	24	18	14	18	18.0808	0.117398	0.542946	0.216183	0.828845	0.900634	N	NA
NUP214	NM_001318324	67	118	226	339	11	10	13	16	12.5799	-0.629727	0.623719	-1.00872	0.313107	0.52471	N	NA
ABL1	NM_007313	2013	2101	2216	2304	16	12	9	21	14.2437	-0.30067	0.608225	-0.494141	0.621207	0.774971	N	NA
NUP214	NM_005085	67	136	228	321	15	12	21	22	17.7623	-0.846088	0.550489	-1.53489	0.124812	0.297927	N	NA
NUP214	NM_005085	701	777	949	1014	18	18	7	15	13.9923	0.411165	0.608829	0.67459	0.499936	0.673196	N	NA
PRRC2B	NM_013318	3433	3537	3658	3738	15	14	12	23	15.8796	-0.458831	0.578498	-0.79278	0.427906	0.619027	N	NA
PRRC2B	NM_013318	4003	4087	4270	4352	14	8	18	18	14.7126	-0.869006	0.5973	-1.45225	0.146431	0.326174	N	NA
RABL6	NM_001173988	1500	1590	1717	1807	20	36	25	24	26.1948	-0.05435	0.487364	-0.111538	0.91119	0.952043	N	NA
RABL6	NM_001173988	201	283	375	468	29	30	16	19	22.837	0.457233	0.49561	0.921972	0.356543	0.55906	N	NA
RABL6	NM_001173988	2081	2153	2287	2332	19	20	15	17	17.5105	0.0242525	0.548427	0.0442228	0.964727	0.976726	N	NA
RABL6	NM_001173988	2395	2465	2783	2857	19	7	16	18	14.9756	-0.586663	0.604188	-0.97018	0.331957	0.537992	N	NA
RABL6	NM_001173988	1408	1456	2156	2233	15	17	13	14	14.5937	-0.0118007	0.589158	-0.0200317	0.984018	0.99059	N	NA
RABL6	NM_001173988	2316	2390	2536	2595	20	15	9	6	12.0073	0.805836	0.646635	1.24252	0.214044	0.410669	N	NA
RABL6	NM_001173989	337	421	535	625	19	20	9	13	14.7539	0.508107	0.590995	0.858687	0.390513	0.585769	N	NA
RABL6	NM_001173989	148	274	334	413	16	16	10	8	12.1783	0.483508	0.634796	0.76089	0.446723	0.634033	N	NA
RABL6	NM_024718	2311	2377	2547	2621	43	26	29	30	31.4788	-0.0456279	0.43923	-0.103879	0.917265	0.955169	N	NA
RABL6	NM_024718	2092	2191	2302	2383	30	30	20	16	23.451	0.430666	0.494188	0.871073	0.383714	0.580508	N	NA
RABL6	NM_024718	1632	1726	1863	1932	20	22	21	18	20.1945	-0.145713	0.521753	-0.27932	0.779999	0.88089	N	NA
RABL6	NM_024718	152	272	336	423	21	17	13	9	14.6194	0.448766	0.596981	0.751178	0.452545	0.638377	N	NA
RABL6	NM_024718	1406	1466	2144	2229	16	20	10	13	14.396	0.349374	0.596412	0.585433	0.558256	0.721968	N	NA
RPS6	NM_001010	127	192	544	641	25	23	4	4	13.0236	1.95844	0.66161	2.89291	0.00381694	0.026613	Y	control
RPS6	NM_001010	169	274	361	452	22	18	7	7	12.8238	1.07638	0.632398	1.69279	0.0904964	0.242607	N	NA
RMRP	NR_003051	1	43	159	250	47	64	33	29	42.2489	0.552477	0.396568	1.39258	0.163747	0.349273	N	NA
RMRP	NR_003051	25	114	198	263	64	56	19	19	37.4248	1.31805	0.415789	3.16026	0.00157626	0.0144819	Y	control
ANP32B	NM_006401	787	865	974	1036	53	45	36	36	41.6934	0.169348	0.382224	0.443031	0.657743	0.799847	N	NA
ANP32B	NM_006401	1009	1064	1220	1290	29	35	13	14	21.8807	0.9049	0.514365	1.75523	0.0792205	0.222524	N	NA
ANP32B	NM_006401	165	226	321	391	26	30	12	14	19.7585	0.773869	0.531929	1.4521	0.146475	0.326174	N	NA
RPL35	NM_007209	11	61	296	363	44	51	21	16	31.7386	1.02478	0.448469	2.28054	0.0225756	0.0958357	N	NA
RPL35	NM_007209	76	181	303	369	38	63	11	17	30.6383	1.49418	0.480725	3.09307	0.00198099	0.0168003	Y	control
RPL35	NM_007209	16	92	182	257	32	35	12	5	19.9522	1.51792	0.565584	2.66442	0.00771213	0.0453473	Y	control
HSPA5	NM_005347	193	288	392	460	16	24	21	37	24.6313	-0.71111	0.497823	-1.42756	0.153419	0.335354	N	NA
HSPA5	NM_005347	2158	2205	2378	2434	10	3	17	21	13.1365	-1.5576	0.649578	-2.3765	0.0174778	0.08008	N	NA
RPL12	NM_000976	190	266	383	468	37	38	8	7	21.0906	1.85262	0.549043	3.33344	0.000857786	0.00969958	Y	control
RPL12	NM_000976	134	206	301	383	37	33	8	9	20.4145	1.60608	0.544597	2.92314	0.00346525	0.0251551	Y	control
GOLGA2	NM_004486	1761	1838	1954	2077	16	11	21	14	15.709	-0.585529	0.585334	-0.999883	0.317367	0.527649	N	NA
GOLGA2	NM_004486	2577	2643	2803	2897	16	11	9	15	12.4825	-0.0748365	0.627988	-0.11914	0.905164	0.949857	N	NA
SET	NM_003011	143	220	310	393	50	68	32	28	43.3002	0.681952	0.394147	1.72913	0.0837858	0.231182	N	NA
SET	NM_003011	30	108	227	305	48	57	24	24	36.9263	0.824405	0.413551	1.99121	0.0464574	0.157295	N	NA
SET	NM_003011	883	1012	1076	1123	22	20	16	9	16.416	0.414434	0.577728	0.717044	0.473347	0.65218	N	NA
USP20	NM_006676	2896	2973	3150	3221	19	21	27	22	22.4982	-0.516263	0.502816	-1.02659	0.304613	0.517666	N	NA
ABL1	NM_005157	2645	2748	2900	2996	18	20	13	16	16.4603	0.121278	0.563017	0.215385	0.829467	0.900634	N	NA
ABL1	NM_005157	1714	1798	1915	1985	14	12	11	20	14.1377	-0.441165	0.601952	-0.73254	0.463839	0.646297	N	NA
ABO	NM_020469	1255	1320	1503	1564	18	8	30	17	18.8031	-1.03069	0.572468	-1.79681	0.0723661	0.211008	N	NA
SURF6	NM_001278942	869	949	1154	1229	22	25	8	17	17.3123	0.601497	0.56666	1.05984	0.289215	0.503132	N	NA
SURF6	NM_001278942	743	824	951	1038	23	16	5	12	13.2563	0.821368	0.630202	1.29882	0.194006	0.384719	N	NA
RPL7A	NM_000972	373	444	576	649	94	90	30	39	60.229	1.11887	0.334233	3.34295	0.000828942	0.0094339	Y	control
RPL7A	NM_000972	165	258	470	550	91	90	29	36	58.5287	1.17742	0.339386	3.46383	0.000532535	0.0069073	Y	control
RPL7A	NM_000972	43	109	227	299	34	50	12	12	25.7152	1.42842	0.503001	2.82518	0.00472535	0.0316684	Y	control
CARD9	NM_052813	1658	1726	1851	1913	11	13	14	20	14.5967	-0.663172	0.593859	-1.11575	0.264529	0.470392	N	NA
SEC16A	NM_014866	22	118	240	302	20	15	7	9	12.1894	0.746249	0.637108	1.16794	0.242832	0.44901	N	NA
AJM1	NM_001080482	1520	1640	1890	1972	1	6	22	28	15.1318	-2.57938	0.664934	-3.74839	0.000177976	0.00288028	Y	arsenite
SAPCD2	NM_178448	770	852	1046	1119	22	30	9	11	17.2622	1.00794	0.5701	1.76167	0.0781252	0.221759	N	NA
SAPCD2	NM_178448	2467	2546	2735	2812	30	30	5	5	16.3056	2.02171	0.613255	3.23122	0.00123265	0.0124251	Y	control
SAPCD2	NM_178448	86	175	407	480	21	26	7	4	13.7403	1.56509	0.640988	2.41365	0.0157937	0.0753758	N	NA
SAPCD2	NM_178448	1535	1618	1769	1808	25	22	6	5	13.621	1.57051	0.635357	2.44198	0.014607	0.0717739	N	NA
DPP7	NM_013379	61	131	221	342	22	18	3	9	12.1717	1.26767	0.660499	1.90272	0.057077	0.18174	N	NA
TUBB4B	NM_006088	399	470	601	689	46	62	19	26	36.7364	0.960057	0.422831	2.26692	0.0233953	0.0982059	N	NA
TUBB4B	NM_006088	200	290	387	465	36	23	13	12	20.0425	0.873113	0.535102	1.62785	0.103556	0.263597	N	NA
TUBB4B	NM_006088	959	1049	1205	1319	25	10	12	16	15.3138	0.0411077	0.598068	0.0687135	0.945218	0.970557	N	NA
MRPL41	NM_032477	60	132	203	288	23	17	7	9	13.311	0.920129	0.621043	1.47573	0.140018	0.318019	N	NA
HUWE1	NM_031407	7460	7507	7606	7709	9	13	21	16	15.1789	-0.895972	0.595882	-1.50135	0.133266	0.310544	N	NA
NONO	NM_001145409	1458	1529	1656	1734	19	24	8	6	13.6328	1.17295	0.627086	1.85944	0.0629654	0.193503	N	NA
NONO	NM_001145408	1629	1700	1827	1905	19	24	8	6	13.6328	1.17295	0.627086	1.85944	0.0629654	0.193503	N	NA
NONO	NM_007363	1585	1659	1833	1908	23	25	10	6	15.3137	1.15127	0.602365	1.90172	0.0572074	0.181827	N	NA
HCFC1	NM_005334	202	335	404	472	16	24	9	14	15.3074	0.493244	0.591637	0.832797	0.404959	0.598783	N	NA
SLC25A6	NM_001636	743	830	950	1058	19	22	7	5	12.615	1.28739	0.646655	1.97516	0.0482497	0.161198	N	NA
VCX3B	NM_001001888	626	667	815	901	10	15	20	19	16.3407	-0.801154	0.575261	-1.39121	0.164162	0.349737	N	NA
VCX3B	NM_001001888	715	776	875	971	20	12	9	9	12.059	0.477287	0.639273	0.745662	0.455872	0.639227	N	NA
GATA1	NM_002049	1053	1127	1261	1320	15	32	11	12	17.0581	0.699077	0.586087	1.19094	0.233678	0.438053	N	NA
OTUD5	NM_001136158	211	282	444	558	13	12	18	13	14.1737	-0.515998	0.602153	-0.856708	0.391606	0.586354	N	NA
OTUD5	NM_001136157	205	278	434	552	13	13	21	13	15.2807	-0.589572	0.591988	-0.995586	0.319451	0.528273	N	NA
OTUD5	NM_017602	206	278	433	550	13	13	21	14	15.5347	-0.626235	0.586242	-1.06772	0.285646	0.497904	N	NA
MSN	NM_002444	1221	1315	1463	1542	32	33	9	11	20.1327	1.30722	0.538606	2.41361	0.0157952	0.0753758	N	NA
MSN	NM_002444	1112	1175	1359	1447	29	13	8	5	12.9335	1.18984	0.653325	1.80969	0.0703436	0.206466	N	NA
XIST	NR_001564	1259	1352	1524	1586	18	26	31	34	27.6753	-0.760358	0.466135	-1.63027	0.103045	0.262674	N	NA
XIST	NR_001564	909	990	1180	1254	19	22	20	27	21.975	-0.411617	0.503835	-0.816855	0.414011	0.607079	N	NA
XIST	NR_001564	1555	1665	1799	1901	16	18	16	12	15.4085	0.00898303	0.582321	0.0154297	0.987689	0.992399	N	NA
LOC101928336	NR_110396	1512	1555	1674	1772	44	46	33	24	36.0675	0.365787	0.418203	0.874506	0.381843	0.578669	N	NA
LOC101928336	NR_110396	1367	1442	1561	1647	25	23	26	22	23.9778	-0.250942	0.486113	-0.516263	0.60567	0.764236	N	NA
BCAP31	NM_001139441	586	677	808	882	21	20	4	6	11.9573	1.50658	0.662305	2.24596	0.0247067	0.102067	N	NA
ARHGAP4	NM_001666	243	327	553	632	24	18	19	29	22.3256	-0.41305	0.502179	-0.822303	0.410904	0.603526	N	NA
ARHGAP4	NM_001164741	238	329	547	630	19	11	16	22	16.9392	-0.543247	0.56381	-0.962941	0.335577	0.541631	N	NA
ARHGAP4	NM_001164741	2475	2615	2873	2970	22	14	6	18	14.381	0.298744	0.617488	0.483325	0.628865	0.78066	N	NA
IRAK1	NM_001569	2302	2375	2516	2621	24	14	12	21	17.3155	-0.0492171	0.562588	-0.0874625	0.930304	0.961369	N	NA
IRAK1	NM_001569	1945	2025	2158	2251	12	10	14	29	16.3887	-1.07359	0.583682	-1.83413	0.0666343	0.199952	N	NA
IRAK1	NM_001569	1453	1510	1613	1708	18	6	12	18	13.3626	-0.514242	0.633402	-0.811163	0.417272	0.610338	N	NA
IRAK1	NM_001025242	1850	1926	2071	2158	9	10	10	23	13.0562	-0.890269	0.633205	-1.40287	0.160656	0.345185	N	NA
IRAK1	NM_001025243	1705	1781	1921	2005	11	12	12	23	14.542	-0.74425	0.60143	-1.23587	0.216508	0.41378	N	NA
FLNA	NM_001110556	1769	1840	2038	2108	47	34	51	29	40.3646	-0.258429	0.417681	-0.618779	0.536062	0.705439	N	NA
FLNA	NM_001110556	1138	1202	1383	1485	23	33	31	35	30.6672	-0.458632	0.445349	-1.02976	0.303125	0.516964	N	NA
FLNA	NM_001110556	1518	1640	1752	1821	21	25	21	29	23.9157	-0.341859	0.487524	-0.701171	0.483196	0.660518	N	NA
FLNA	NM_001110556	7922	8010	8162	8245	20	17	19	30	21.4789	-0.602747	0.511068	-1.17873	0.238508	0.443713	N	NA
FLNA	NM_001110556	5472	5531	5692	5756	23	19	14	21	18.8638	0.00692232	0.534499	0.0129495	0.989668	0.993046	N	NA
FLNA	NM_001110556	6608	6707	6890	7003	12	16	20	21	17.5176	-0.725444	0.555699	-1.30443	0.192086	0.383303	N	NA
FLNA	NM_001110556	1013	1086	1812	1874	14	8	16	26	16.165	-1.05737	0.583382	-1.80737	0.0707045	0.207181	N	NA
FLNA	NM_001110556	3238	3333	3424	3523	19	14	12	18	15.4733	-0.107153	0.578059	-0.185344	0.85296	0.919695	N	NA
FLNA	NM_001110556	4355	4419	4618	4713	11	14	11	27	15.7418	-0.734817	0.595946	-1.23157	0.218109	0.41594	N	NA
FLNA	NM_001110556	1371	1444	1950	2040	16	9	16	15	14.0391	-0.517043	0.604971	-0.854219	0.392984	0.58651	N	NA
FLNA	NM_001110556	5014	5105	5241	5330	11	12	20	13	14.3218	-0.699661	0.606063	-1.1536	0.248664	0.456446	N	NA
FLNA	NM_001110556	730	806	968	1051	13	16	9	17	13.5268	-0.0711156	0.613507	-0.115905	0.907728	0.950286	N	NA
FLNA	NM_001110556	3725	3790	3948	4004	2	16	14	18	12.8552	-0.713109	0.856773	-0.832978	0.404857	0.598783	N	NA
FLNA	NM_001456	1616	1687	1979	2052	53	44	54	40	47.6937	-0.223216	0.371861	-0.600304	0.548304	0.71328	N	NA
FLNA	NM_001456	1981	2051	2312	2382	34	20	44	34	33.4808	-0.766291	0.43945	-1.7428	0.0813691	0.226754	N	NA
FLNA	NM_001456	1466	1516	1725	1817	28	34	29	38	32.1661	-0.341521	0.431308	-0.791802	0.428476	0.619027	N	NA
FLNA	NM_001456	1105	1171	1346	1437	24	24	37	39	31.5082	-0.870947	0.434771	-2.00162	0.0453255	0.155196	N	NA
FLNA	NM_001456	7903	8004	8153	8226	19	19	20	35	23.2969	-0.716901	0.499473	-1.43423	0.151506	0.333654	N	NA
FLNA	NM_001456	3238	3331	3433	3529	30	16	17	21	20.5354	0.00379018	0.525404	0.00721289	0.994245	0.995826	N	NA
FLNA	NM_001456	1009	1071	1802	1872	12	9	13	31	16.37	-1.15505	0.592341	-1.94334	0.0519752	0.171151	N	NA
FLNA	NM_001456	6790	6885	7014	7107	15	18	12	18	15.5567	-0.097157	0.57795	-0.168106	0.8665	0.928079	N	NA
FLNA	NM_001456	318	389	528	600	14	15	6	19	13.144	-0.0113904	0.634993	-0.0179305	0.985694	0.991314	N	NA
FLNA	NM_001456	5368	5442	5538	5640	15	13	10	16	13.2843	-0.127095	0.611414	-0.207845	0.83535	0.905134	N	NA
FLNA	NM_001456	6155	6242	6407	6484	14	12	16	12	13.5555	-0.335974	0.60968	-0.551101	0.581564	0.745552	N	NA
FLNA	NM_001456	824	891	1085	1173	13	19	12	8	12.821	0.355796	0.631904	0.562892	0.573508	0.737906	N	NA
RPL10	NM_006013	458	533	715	781	22	16	5	10	12.5322	0.935896	0.640019	1.45568	0.14548	0.325669	N	NA
UNC5B	NM_001244889	96	175	311	391	2	5	24	35	17.4694	-2.83158	0.637555	-4.25991	2.04512497030519e-05	0.000546606	Y	arsenite
UNC5B	NM_001244889	341	425	595	684	2	1	20	29	13.8375	-3.35439	0.72568	-4.13517	3.54695676456368e-05	0.000802158	Y	arsenite
UNC5B	NM_170744	348	421	600	683	3	2	43	45	25.0264	-3.77214	0.619643	-5.56056	2.68902787157488e-08	2.06236746324265e-06	Y	arsenite
UNC5B	NM_170744	110	215	320	396	2	5	29	44	21.2062	-3.13541	0.613589	-4.86249	1.15917554986078e-06	5.84224477129834e-05	Y	arsenite
MGEA5	NM_012215	366	447	539	637	31	29	42	37	35.1465	-0.631112	0.415837	-1.51728	0.129196	0.303856	N	NA
MGEA5	NM_012215	67	115	290	390	15	16	28	28	22.2644	-1.02474	0.506301	-2.02054	0.0433276	0.149862	N	NA
MGEA5	NM_001142434	376	438	549	641	10	10	23	23	17.0428	-1.30972	0.568888	-2.29254	0.0218747	0.0941144	N	NA
MGEA5	NM_001142434	68	128	220	327	11	12	21	15	15.12	-0.81272	0.592944	-1.36903	0.170989	0.361435	N	NA
VIM	NM_003380	552	648	719	793	30	21	7	7	15.2623	1.39665	0.604668	2.29067	0.0219828	0.0943494	N	NA
VIM	NM_003380	347	423	874	956	25	20	8	10	14.9977	0.935022	0.593612	1.5694	0.116555	0.286754	N	NA
DDIT4	NM_019058	364	442	706	766	96	84	52	69	73.2427	0.306519	0.299369	1.02375	0.305952	0.519442	N	NA
DDIT4	NM_019058	983	1060	1290	1354	72	72	70	67	69.9296	-0.187982	0.30606	-0.614221	0.539069	0.707528	N	NA
DDIT4	NM_019058	14	95	340	414	67	65	41	32	49.8882	0.559475	0.363222	1.53974	0.123623	0.296219	N	NA
DDIT4	NM_019058	739	807	943	1017	49	32	30	18	31.4372	0.434439	0.456617	0.951134	0.341537	0.547203	N	NA
DDIT4	NM_019058	184	257	1226	1306	8	11	21	24	16.5217	-1.33134	0.579004	-2.2891	0.0220733	0.0945082	N	NA
SCD	NM_005063	239	287	434	513	37	22	21	23	25.1367	0.13916	0.481958	0.288695	0.772815	0.875559	N	NA
LDB1	NM_003893	161	212	433	503	12	14	12	28	16.5019	-0.758206	0.583071	-1.29877	0.194022	0.384719	N	NA
EIF3A	NM_003750	3324	3380	3520	3603	31	32	9	10	19.4258	1.32638	0.546834	2.4113	0.0158956	0.0753758	N	NA
EIF3A	NM_003750	3664	3757	3874	3985	22	30	11	14	18.6045	0.728885	0.548687	1.32608	0.184814	0.37705	N	NA
EIF3A	NM_003750	2561	2624	2738	2840	16	23	16	10	16.0846	0.28006	0.584897	0.478807	0.632076	0.782993	N	NA
EIF3A	NM_003750	2854	2928	3063	3143	19	23	4	11	13.5061	1.08082	0.634384	1.69426	0.0902158	0.242223	N	NA
EIF3A	NM_003750	1715	1776	1948	2003	20	16	9	10	13.2604	0.573146	0.614354	0.931435	0.351629	0.556299	N	NA
TRIM44	NM_017583	237	312	535	604	11	20	15	23	17.3069	-0.473978	0.568904	-0.832975	0.404859	0.598783	N	NA
FTH1	NM_002032	204	271	448	505	21	32	11	25	21.6568	0.300118	0.531328	0.564585	0.572356	0.736961	N	NA
FTH1	NM_002032	30	140	207	282	18	11	16	17	15.4529	-0.408232	0.580465	-0.703093	0.481998	0.660127	N	NA
SPTBN2	NM_006946	3143	3236	3497	3535	17	9	14	19	14.6913	-0.539172	0.59646	-0.903315	0.366359	0.567221	N	NA
SPTBN2	NM_006946	4159	4244	4484	4558	12	6	9	24	12.7208	-0.956753	0.651586	-1.46399	0.143197	0.323431	N	NA
GAB2	NM_080491	2961	3027	3137	3244	2	2	27	35	17.6291	-3.46084	0.675641	-4.66259	3.12254184108838e-06	0.00012195	Y	arsenite
PICALM	NM_007166	138	207	334	412	20	15	9	10	13.0235	0.535082	0.61851	0.863858	0.387666	0.581994	N	NA
PGGHG	NM_025092	1827	1910	2151	2225	21	20	12	14	16.3101	0.355653	0.565185	0.628902	0.529413	0.700589	N	NA
PGGHG	NM_025092	2523	2611	2947	3008	16	15	14	13	14.372	-0.0603154	0.592149	-0.101872	0.918858	0.955699	N	NA
RPLP2	NM_001004	118	183	338	398	46	44	10	14	26.8141	1.52703	0.485648	3.12532	0.00177612	0.0155874	Y	control
RPLP2	NM_001004	46	122	185	263	20	23	6	11	14.3022	0.95843	0.610055	1.56466	0.117663	0.288676	N	NA
MUC6	NM_005961	5373	5459	5966	6032	7	7	24	30	17.7528	-1.95535	0.580404	-3.3276	0.000875988	0.00984231	Y	arsenite
KCNQ1OT1	NR_002728	61122	61229	61268	61362	70	94	57	52	67.1266	0.319482	0.326895	0.977253	0.328444	0.534831	N	NA
KCNQ1OT1	NR_002728	64553	64610	64706	64811	16	12	17	9	13.5154	-0.159955	0.621247	-0.257558	0.796748	0.891226	N	NA
HBE1	NM_005330	239	318	532	594	18	11	13	13	13.5666	-0.102897	0.608731	-0.169033	0.86577	0.928079	N	NA
HBG1	NM_000559	190	253	407	464	45	34	28	31	33.7695	0.145682	0.419461	0.347274	0.728385	0.849221	N	NA
HBG1	NM_000559	68	123	329	411	43	43	10	24	28.4698	1.02035	0.476809	2.13466	0.0327886	0.122801	N	NA
HBG1	NM_000559	13	92	178	243	14	16	8	18	13.7068	-0.0253252	0.614527	-0.0412018	0.967135	0.978226	N	NA
HBG2	NM_000184	69	134	319	407	54	59	21	35	40.6204	0.729092	0.398988	1.82569	0.0678971	0.201996	N	NA
HBG2	NM_000184	209	281	414	490	52	50	19	35	37.4768	0.635737	0.413192	1.53736	0.124206	0.296883	N	NA
RPL27A	NM_000990	565	651	762	828	25	32	16	17	21.9386	0.488863	0.50901	0.959772	0.33717	0.542176	N	NA
RPL27A	NM_000990	424	510	657	736	30	40	8	9	20.5604	1.61152	0.550071	2.90421	0.00368177	0.0259786	Y	control
WEE1	NM_003390	385	455	611	694	15	13	21	28	19.5235	-0.967269	0.532292	-1.81393	0.0696889	0.205227	N	NA
WEE1	NM_003390	99	194	336	374	7	16	14	17	13.6811	-0.582535	0.624043	-0.933146	0.350744	0.556054	N	NA
LMO2	NM_005574	614	723	838	901	22	19	8	8	13.6047	0.951378	0.615643	1.53918	0.123761	0.296219	N	NA
ZFP91-CNTF	NR_024091	95	193	400	486	7	8	14	22	13.0567	-1.30368	0.631671	-2.05261	0.0401107	0.143229	N	NA
INCENP	NM_001040694	2367	2472	2823	2897	9	10	16	16	13.0181	-0.882248	0.620823	-1.4184	0.156073	0.339987	N	NA
EEF1G	NM_001404	542	612	814	885	70	88	31	45	56.3858	0.779289	0.350557	2.22142	0.0263228	0.106744	N	NA
EEF1G	NM_001404	811	884	978	1070	76	84	26	34	52.4895	1.11651	0.358186	3.11227	0.00185652	0.0161497	Y	control
EEF1G	NM_001404	267	331	483	557	56	55	18	17	34.6618	1.31945	0.430659	3.05373	0.00226019	0.0184582	Y	control
EEF1G	NM_001404	1204	1290	1356	1445	21	22	8	10	14.6074	0.88092	0.598461	1.46717	0.14233	0.322046	N	NA
HNRNPUL2-BSCL2	NR_037946	208	298	402	481	21	10	54	51	35.524	-1.91082	0.447753	-4.24318	2.20371120302334e-05	0.000571669	Y	arsenite
HNRNPUL2-BSCL2	NR_037946	452	536	638	686	30	16	24	41	27.6469	-0.703837	0.476678	-1.47549	0.14008	0.318019	N	NA
HNRNPUL2	NM_001079559	214	304	400	480	18	10	52	45	32.7715	-1.93306	0.461209	-4.1645	3.12033800326374e-05	0.000733903	Y	arsenite
HNRNPUL2	NM_001079559	454	538	641	687	25	15	25	36	25.3498	-0.8066	0.484198	-1.66424	0.0960655	0.252172	N	NA
NXF1	NM_001081491	1762	1854	2119	2198	10	8	29	31	20.3419	-1.80811	0.544743	-3.29069	0.000999409	0.0107328	Y	arsenite
NXF1	NM_001081491	2503	2629	2767	2831	3	3	25	21	13.945	-2.66851	0.675717	-3.78108	0.000156151	0.0025986	Y	arsenite
PPP1R14B	NM_138689	152	245	345	432	20	28	21	23	22.8858	-0.117426	0.49941	-0.235158	0.814086	0.89767	N	NA
PPP1R14B	NM_138689	300	414	528	604	30	30	7	15	19.4263	1.0862	0.548587	1.97207	0.0486018	0.161761	N	NA
TRMT112	NM_001286084	761	829	918	1000	26	22	6	5	13.837	1.59802	0.632953	2.4933	0.0126562	0.0658572	N	NA
FAU	NM_001997	208	299	371	426	49	42	17	14	29.0187	1.19501	0.463281	2.57145	0.0101273	0.0565335	N	NA
FAU	NM_001997	86	162	266	371	28	29	9	9	17.8132	1.25428	0.564	2.21149	0.0270017	0.107846	N	NA
NEAT1	NR_028272	670	748	1052	1157	226	200	169	205	197.283	-0.0716985	0.193681	-0.370188	0.711243	0.835864	N	NA
NEAT1	NR_028272	322	401	865	923	119	123	106	145	122.419	-0.299783	0.242419	-1.23662	0.216229	0.413697	N	NA
NEAT1	NR_028272	101	163	292	368	88	64	153	187	126.052	-1.39946	0.245716	-5.69147	1.25947998897811e-08	1.16932773713546e-06	Y	arsenite
NEAT1	NR_028272	1639	1716	1930	1994	93	76	96	97	90.5758	-0.449638	0.273106	-1.64631	0.099699	0.257495	N	NA
NEAT1	NR_028272	482	558	651	722	49	39	30	41	38.9384	0.0480995	0.394963	0.121774	0.903078	0.948796	N	NA
NEAT1	NR_028272	300	378	1638	1718	19	22	18	30	22.1571	-0.432594	0.507044	-0.852984	0.393668	0.58651	N	NA
NEAT1	NR_028272	2151	2196	2393	2451	16	10	26	29	20.7333	-1.22929	0.527361	-2.32383	0.0201344	0.0883509	N	NA
NEAT1	NR_028272	3242	3300	3484	3563	12	5	14	24	13.9342	-1.23247	0.627021	-1.95631	0.0504289	0.166898	N	NA
NEAT1	NR_131012	356	423	854	916	178	167	182	207	183.379	-0.429165	0.199371	-2.15256	0.0313536	0.119455	N	NA
NEAT1	NR_131012	1134	1223	1396	1477	208	178	151	197	180.932	-0.107792	0.203308	-0.530186	0.595983	0.758329	N	NA
NEAT1	NR_131012	21519	21599	21795	21892	224	244	98	120	165.084	0.835492	0.217301	3.8438	0.000121141	0.00220314	Y	control
NEAT1	NR_131012	80	153	275	348	57	47	123	149	96.974	-1.61114	0.274367	-5.86449	4.5050304890494e-09	4.67463163687244e-07	Y	arsenite
NEAT1	NR_131012	4249	4322	4448	4525	69	45	15	22	35.5015	1.27999	0.433363	2.94448	0.00323498	0.0235806	Y	control
NEAT1	NR_131012	236	322	1225	1295	35	38	27	47	36.3319	-0.249281	0.415699	-0.599634	0.54875	0.713335	N	NA
NEAT1	NR_131012	4882	4956	5134	5242	49	39	11	21	28.3463	1.12293	0.471497	2.37451	0.0175723	0.0803045	N	NA
NEAT1	NR_131012	13263	13364	13471	13548	36	45	11	7	23.4026	1.72765	0.531215	3.22344	0.00126662	0.0124822	Y	control
NEAT1	NR_131012	2198	2291	2500	2599	26	13	18	31	21.7915	-0.538424	0.522784	-1.02934	0.30332	0.516964	N	NA
NEAT1	NR_131012	20922	20988	21903	21978	41	30	8	7	20.0598	1.76636	0.557914	3.13048	0.00174522	0.0153928	Y	control
NEAT1	NR_131012	7148	7227	7464	7542	35	20	8	9	16.9035	1.25939	0.583147	2.14672	0.0318156	0.120435	N	NA
NEAT1	NR_131012	21992	22083	22404	22476	24	32	8	8	17.1157	1.37704	0.581782	2.35022	0.0187622	0.0840011	N	NA
NEAT1	NR_131012	19450	19498	19673	19751	30	26	8	7	16.7365	1.44514	0.584065	2.45411	0.0141233	0.070516	N	NA
NEAT1	NR_131012	3256	3315	3496	3573	20	9	16	19	15.9194	-0.485304	0.583554	-0.831197	0.405862	0.599615	N	NA
NEAT1	NR_131012	19067	19176	19262	19340	19	13	13	19	15.7806	-0.231954	0.574697	-0.403544	0.686548	0.821268	N	NA
NEAT1	NR_131012	18612	18674	19800	19876	23	25	6	8	14.6617	1.33212	0.610286	2.16576	0.0303295	0.117319	N	NA
NEAT1	NR_131012	4501	4577	4790	4887	24	16	11	10	14.7045	0.576668	0.595302	0.967317	0.333385	0.539534	N	NA
NEAT1	NR_131012	20741	20802	20944	21018	18	20	5	8	12.1074	1.11074	0.648579	1.70175	0.0888021	0.239888	N	NA
EHBP1L1	NM_001099409	4127	4214	4411	4509	17	16	17	37	21.7924	-0.865842	0.524036	-1.65011	0.0989215	0.256404	N	NA
EHBP1L1	NM_001099409	1217	1300	1461	1531	9	15	20	28	18.4112	-1.11615	0.557589	-1.99675	0.0458525	0.155846	N	NA
EHBP1L1	NM_001099409	3819	3925	4192	4249	22	10	14	19	16.0081	-0.280339	0.582618	-0.481039	0.630489	0.781576	N	NA
EHBP1L1	NM_001099409	17	86	237	319	14	18	10	15	13.9984	0.0976082	0.602748	0.161917	0.871371	0.931575	N	NA
EHBP1L1	NM_001099409	1148	1222	1871	1974	10	8	15	18	12.9785	-0.98811	0.622339	-1.58334	0.113343	0.282397	N	NA
EHBP1L1	NM_001099409	3649	3709	3873	3982	15	8	11	16	12.3901	-0.429067	0.633421	-0.676993	0.498411	0.671655	N	NA
CFL1	NM_005507	639	718	848	915	45	33	4	8	20.7282	2.17501	0.571375	3.73303	0.000189193	0.00300664	Y	control
CFL1	NM_005507	255	328	468	528	44	22	8	7	18.8131	1.64555	0.579976	2.80941	0.00496322	0.0326684	Y	control
CFL1	NM_005507	169	227	346	443	29	14	5	6	12.5542	1.43324	0.659355	2.15077	0.0314942	0.11972	N	NA
CCDC85B	NM_006848	393	471	610	707	24	19	7	8	13.7467	1.09257	0.617009	1.76126	0.0781939	0.221759	N	NA
CCDC85B	NM_006848	706	778	916	984	21	19	7	9	13.3527	0.925514	0.619049	1.48915	0.136449	0.313381	N	NA
SF3B2	NM_006842	526	595	705	802	20	13	6	11	11.9338	0.600656	0.645376	0.928647	0.353072	0.557084	N	NA
NDUFV1	NM_001166102	989	1061	1257	1353	17	14	12	11	13.2629	0.139847	0.611019	0.228853	0.818983	0.89767	N	NA
LOC100128494	NR_104178	891	951	1155	1259	15	10	11	26	15.4044	-0.713699	0.598057	-1.19179	0.233343	0.438053	N	NA
LOC100128494	NR_104178	230	323	406	502	8	10	17	23	14.8706	-1.23305	0.599487	-2.04839	0.040522	0.143824	N	NA
LOC100128494	NR_104178	1904	1971	2118	2191	20	14	12	7	12.8947	0.477299	0.630568	0.756281	0.44948	0.636343	N	NA
NUMA1	NM_001286561	2536	2621	2770	2878	36	26	31	48	35.12	-0.573054	0.419592	-1.36529	0.172161	0.363268	N	NA
NUMA1	NM_001286561	3092	3178	3337	3421	20	29	30	46	31.5765	-0.81991	0.447338	-1.83162	0.0670082	0.200683	N	NA
NUMA1	NM_001286561	4488	4563	4722	4820	24	21	28	31	26.1547	-0.609488	0.466936	-1.30478	0.191968	0.383303	N	NA
NUMA1	NM_001286561	3747	3834	3997	4074	18	24	11	24	18.86	0.0276778	0.550782	0.0502438	0.959928	0.976726	N	NA
NUMA1	NM_001286561	4188	4274	4389	4494	19	20	22	14	18.7786	-0.146106	0.545362	-0.267977	0.788717	0.886741	N	NA
NUMA1	NM_001286561	3345	3422	3545	3613	13	8	20	32	18.6335	-1.40484	0.558694	-2.50231	0.0123384	0.0647568	N	NA
NUMA1	NM_001286561	3166	3248	3990	4054	14	4	14	25	14.3834	-1.19437	0.632162	-1.8812	0.0599452	0.187156	N	NA
NUMA1	NM_006185	4389	4455	4620	4714	17	19	25	25	21.7746	-0.675399	0.50673	-1.33214	0.182814	0.374545	N	NA
NUMA1	NM_006185	2298	2407	2600	2663	17	14	13	30	18.3801	-0.640582	0.557646	-1.14774	0.251075	0.458961	N	NA
NUMA1	NM_006185	3636	3720	3851	3948	12	23	16	21	18.0153	-0.287546	0.560608	-0.512967	0.607974	0.764879	N	NA
NUMA1	NM_006185	3049	3140	3228	3321	9	12	21	26	17.4826	-1.26546	0.564854	-2.23199	0.0256156	0.104596	N	NA
NUMA1	NM_006185	4110	4190	4307	4392	13	12	17	15	14.3917	-0.552584	0.594718	-0.928759	0.353014	0.557084	N	NA
NUMA1	NM_006185	3058	3135	3890	3953	14	4	13	23	13.5853	-1.08888	0.642197	-1.68928	0.0911651	0.243291	N	NA
NUMA1	NM_006185	3247	3328	3447	3523	8	4	14	26	13.3415	-1.70219	0.64682	-2.60236	0.00925853	0.0520129	N	NA
INPPL1	NM_001567	3457	3544	3707	3810	22	13	17	24	18.8591	-0.445837	0.540598	-0.824399	0.409713	0.602278	N	NA
RPS3	NM_001256802	462	597	661	754	25	14	12	9	14.4828	0.532736	0.605488	0.878822	0.379498	0.576105	N	NA
RPS3	NM_001260507	279	350	458	563	21	12	11	6	12.0929	0.565877	0.6511	0.867957	0.385418	0.581069	N	NA
RPS3	NM_001005	437	522	638	701	30	16	14	10	16.8706	0.578642	0.576842	1.00195	0.316367	0.526946	N	NA
RPS3	NM_001005	301	375	720	789	25	21	8	13	15.9967	0.780451	0.578327	1.34609	0.178275	0.369973	N	NA
PCF11	NM_001346413	175	258	332	418	8	8	21	15	13.5246	-1.25365	0.625681	-1.99458	0.0460884	0.156346	N	NA
DCUN1D5	NM_001318739	338	430	533	582	23	12	7	10	12.3809	0.664864	0.640566	1.03542	0.300475	0.5141	N	NA
HYOU1	NM_006389	2269	2354	2478	2528	22	20	8	15	15.62	0.551556	0.582738	0.945087	0.344614	0.549142	N	NA
H2AFX	NM_002105	760	826	957	1040	42	39	21	25	30.7511	0.523168	0.437346	1.19548	0.2319	0.437509	N	NA
H2AFX	NM_002105	404	498	612	681	28	24	14	15	19.6036	0.525686	0.527613	0.995407	0.319538	0.528273	N	NA
H2AFX	NM_002105	63	153	252	313	12	30	14	11	16.5525	0.439127	0.600209	0.731344	0.464569	0.646803	N	NA
H2AFX	NM_002105	948	1009	1207	1248	11	19	14	14	14.4934	-0.133577	0.60156	-0.222112	0.824227	0.898046	N	NA
HSPA8	NM_006597	1718	1773	1973	2040	31	17	8	9	15.329	1.07505	0.600499	1.78188	0.0747686	0.216545	N	NA
HSPA8	NM_006597	1990	2043	2136	2254	24	24	4	6	13.5526	1.72065	0.642294	2.63713	0.00836113	0.0484771	Y	control
SLC37A2	NM_198277	3697	3784	3944	4014	33	33	21	15	24.8455	0.555966	0.487298	1.14014	0.254229	0.460905	N	NA
SLC37A2	NM_001145290	3636	3727	3887	3956	40	36	23	16	27.9021	0.639029	0.466468	1.3688	0.171063	0.361435	N	NA
KRT18	NM_199187	140	242	338	401	24	16	5	5	11.6939	1.45559	0.667728	2.15444	0.0312057	0.119149	N	NA
KRT18	NM_000224	141	202	395	470	27	20	6	6	13.8333	1.46912	0.628384	2.31401	0.020667	0.0902389	N	NA
ATP2A2	NM_001681	111	192	380	446	43	44	46	50	45.754	-0.386178	0.36656	-1.05348	0.292119	0.506535	N	NA
ATP2A2	NM_001681	75	142	489	583	38	24	24	31	28.729	-0.087277	0.45418	-0.192152	0.847623	0.9145	N	NA
ATP2A2	NM_001681	385	466	538	633	15	16	15	15	15.191	-0.191226	0.579957	-0.329765	0.741577	0.858221	N	NA
ATP2A2	NM_170665	111	190	379	446	41	38	44	44	41.7965	-0.402538	0.381584	-1.05487	0.291485	0.506384	N	NA
ATP2A2	NM_170665	70	140	480	582	32	20	23	30	25.9415	-0.272533	0.473755	-0.575199	0.565157	0.728769	N	NA
HIP1R	NM_003959	1320	1450	1547	1616	23	5	16	16	14.8578	-0.422354	0.630793	-0.669204	0.503366	0.677297	N	NA
EP400	NM_015409	2256	2329	2501	2616	13	18	17	31	19.8777	-0.785995	0.539036	-1.45667	0.145207	0.325669	N	NA
SCARNA10	NR_004387	49	138	244	307	17	7	29	19	18.5683	-1.15689	0.572749	-2.01419	0.0439894	0.151854	N	NA
SCARNA10	NR_004387	30	90	204	278	8	11	18	29	16.9218	-1.37621	0.579181	-2.36468	0.0180457	0.082043	N	NA
GAPDH	NM_001256799	1079	1139	1235	1321	36	24	6	10	17.7409	1.46415	0.576716	2.51797	0.0118032	0.0627136	N	NA
GAPDH	NM_001289746	957	1075	1166	1227	38	25	4	10	17.8296	1.69249	0.590084	2.83509	0.00458131	0.0309634	Y	control
GAPDH	NM_001289745	1063	1181	1272	1333	38	25	4	10	17.8296	1.69249	0.590084	2.83509	0.00458131	0.0309634	Y	control
GAPDH	NM_002046	970	1088	1183	1242	49	30	6	10	21.9698	1.83863	0.547352	3.32045	0.000898717	0.0100338	Y	control
GAPDH	NM_002046	718	801	946	1006	23	24	0	9	12.9386	1.05242	0.923976	1.16077	0.245737	0.452012	N	NA
PTMS	NM_002824	507	581	853	923	71	95	24	28	51.9104	1.36273	0.373346	3.64147	0.00027109	0.00409037	Y	control
PTMS	NM_002824	264	340	456	542	72	78	12	20	42.587	1.87433	0.413946	4.49941	6.81422972764766e-06	0.000226798	Y	control
PTMS	NM_002824	96	182	440	527	27	42	5	8	19.2619	1.91888	0.583728	3.23974	0.0011964	0.0122562	Y	control
PTMS	NM_001330333	338	450	609	669	33	34	7	5	18.4811	1.95727	0.584585	3.29504	0.00098408	0.0106498	Y	control
PTMS	NM_001330333	661	737	938	1016	19	30	3	11	14.8739	1.36792	0.634652	2.13765	0.0325452	0.122409	N	NA
PTMS	NM_001330333	238	322	401	474	23	25	3	9	14.0456	1.51759	0.636689	2.3569	0.0184283	0.0829493	N	NA
CLEC12A-AS1	NR_135047	390	458	654	712	199	215	118	99	153.281	0.654156	0.231864	2.82084	0.00478978	0.0317579	Y	control
CLEC12A-AS1	NR_135047	311	385	462	565	175	188	130	113	148.74	0.307489	0.230983	1.33117	0.183132	0.374762	N	NA
CLEC12A-AS1	NR_135047	92	152	257	390	64	66	48	50	56.0805	0.141068	0.335972	0.419868	0.674582	0.811707	N	NA
TUBA1B	NM_006082	1270	1345	1485	1547	38	37	12	6	21.9759	1.60872	0.541419	2.94816	0.00319667	0.0234955	Y	control
TUBA1B	NM_006082	348	431	520	578	31	33	4	9	17.9583	1.81678	0.587834	3.04828	0.00230152	0.0185806	Y	control
KRT8	NR_045962	598	695	896	990	52	62	12	11	32.1911	1.90738	0.467308	4.04668	5.1948960202161e-05	0.00109093	Y	control
KRT8	NR_045962	1597	1680	1772	1850	42	51	15	28	32.6151	0.818657	0.444577	1.83887	0.0659343	0.198817	N	NA
KRT8	NM_001256282	244	336	535	627	60	74	15	14	38.3935	1.83498	0.433147	4.20896	2.56552998508311e-05	0.000624864	Y	control
KRT8	NM_001256282	1241	1327	1420	1497	53	56	16	31	37.2274	0.917225	0.420486	2.178	0.029406	0.115271	N	NA
KRT8	NM_002273	1243	1326	1418	1496	42	51	15	28	32.6151	0.818657	0.444577	1.83887	0.0659343	0.198817	N	NA
KRT8	NM_002273	121	186	438	507	32	39	12	8	21.6617	1.41438	0.535717	2.62475	0.00867124	0.0490938	Y	control
KRT8	NM_002273	412	493	573	648	23	29	3	4	13.7227	2.21809	0.666582	3.22486	0.00126033	0.0124822	Y	control
KRT8	NM_001256293	338	433	636	731	52	63	12	11	32.428	1.91974	0.46693	4.07589	4.58388941007327e-05	0.000974215	Y	control
KRT8	NM_001256293	1338	1421	1513	1591	42	51	15	28	32.6151	0.818657	0.444577	1.83887	0.0659343	0.198817	N	NA
EIF4B	NM_001330654	1205	1285	1468	1525	23	20	8	10	14.5657	0.876885	0.598361	1.46066	0.144108	0.324658	N	NA
EIF4B	NM_001330654	887	954	1099	1185	18	21	12	9	14.6287	0.550766	0.59788	0.920208	0.357464	0.559456	N	NA
HNRNPA1	NM_031157	354	431	665	745	19	26	13	8	16.0649	0.734802	0.588759	1.24595	0.212783	0.410217	N	NA
HNRNPA1	NM_031157	545	615	751	835	12	16	6	17	12.4407	0.05023	0.645141	0.0778301	0.937963	0.964762	N	NA
HNRNPA1	NR_135167	350	428	667	746	22	28	14	9	17.7307	0.761405	0.565398	1.34437	0.17883	0.370066	N	NA
HNRNPA1	NR_135167	558	617	751	836	13	20	9	15	13.9661	0.194241	0.610209	0.318225	0.750314	0.865068	N	NA
NFE2	NM_001261461	1241	1321	1471	1538	30	21	7	12	16.5325	1.03714	0.579552	1.78198	0.0747518	0.216545	N	NA
HNRNPA1	NM_002136	996	1101	1208	1290	36	39	5	12	21.5116	1.71341	0.547269	3.09982	0.0019364	0.0165015	Y	control
HNRNPA1	NM_002136	199	277	369	439	30	33	12	15	21.5871	0.885619	0.514746	1.71655	0.0860609	0.234639	N	NA
HNRNPA1	NM_002136	349	423	666	748	22	30	15	7	17.9863	0.858778	0.57636	1.48701	0.137012	0.313381	N	NA
HNRNPA1	NM_002136	562	620	748	824	20	19	8	20	16.2214	0.213893	0.581499	0.367623	0.713154	0.836995	N	NA
RPL41	NM_021104	104	169	332	388	33	21	12	2	16.0902	1.18385	0.814595	1.45126	0.146706	0.326174	N	NA
RPL41	NM_021104	136	206	388	430	19	29	5	11	15.2172	1.18179	0.612545	1.91808	0.0551003	0.17871	N	NA
SMARCC2	NM_139067	2745	2827	3029	3094	14	12	13	20	14.7178	-0.528291	0.590123	-0.894694	0.370951	0.570435	N	NA
ESYT1	NM_001184796	150	219	323	412	14	16	14	14	14.4309	-0.142478	0.592054	-0.24069	0.809796	0.89767	N	NA
RPL41	NM_001035267	229	318	475	538	36	37	13	12	23.3583	1.17709	0.504891	2.32269	0.020196	0.0884013	N	NA
RPL41	NM_001035267	37	71	186	255	22	19	7	8	13.3147	1.03174	0.622108	1.65036	0.0988687	0.256404	N	NA
ATP5F1B	NM_001686	158	241	380	438	18	23	4	8	12.5279	1.30738	0.651406	1.98948	0.0466487	0.15764	N	NA
XPOT	NM_007235	189	260	376	434	19	18	17	25	19.6493	-0.396663	0.526092	-0.753825	0.450954	0.637527	N	NA
ZFC3H1	NM_144982	166	240	350	423	9	12	37	32	23.6478	-1.80842	0.519033	-3.45917	0.000541847	0.00697678	Y	arsenite
ZFC3H1	NM_144982	436	525	651	747	11	17	18	20	16.7043	-0.618526	0.568459	-1.08756	0.276788	0.485531	N	NA
NUDT4P2	NR_104005	315	397	467	565	27	19	43	42	33.4744	-1.09142	0.430258	-2.53311	0.0113054	0.061174	N	NA
NUDT4P2	NR_104005	141	232	333	414	22	20	28	38	27.2643	-0.846792	0.46276	-1.82817	0.0675235	0.201884	N	NA
NUDT4	NM_019094	75	140	312	394	35	30	54	61	45.8253	-1.04064	0.370966	-2.80267	0.00506821	0.0332354	Y	arsenite
NUDT4	NM_019094	323	400	477	597	30	22	45	44	35.9211	-0.990861	0.415407	-2.38285	0.0171794	0.0793311	N	NA
NUDT4	NM_019094	176	253	335	414	15	11	15	19	15.023	-0.576483	0.584788	-0.985131	0.32456	0.533573	N	NA
NUDT4	NM_199040	99	173	322	405	34	36	62	70	51.6373	-1.12924	0.354169	-3.18532	0.00144595	0.0136399	Y	arsenite
NUDT4	NM_199040	324	400	475	581	24	19	38	38	30.36	-1.02326	0.444923	-2.29688	0.0216257	0.0934995	N	NA
TMPO	NM_003276	202	288	420	495	16	14	12	11	13.0469	0.0994982	0.61426	0.161978	0.871323	0.931575	N	NA
TMPO	NM_001307975	203	306	443	529	25	18	16	14	17.8606	0.220077	0.548714	0.400997	0.688423	0.821268	N	NA
TMPO	NM_001032284	203	306	443	529	25	18	16	14	17.8606	0.220077	0.548714	0.400997	0.688423	0.821268	N	NA
TMPO	NM_001032283	200	314	417	487	23	21	20	14	19.2993	0.0862099	0.535361	0.161047	0.872056	0.931743	N	NA
SLC25A3	NM_213611	65	117	351	408	26	12	6	10	12.7388	0.841193	0.643663	1.30215	0.192866	0.383558	N	NA
RPLP0	NM_053275	413	483	734	801	44	44	8	13	25.5479	1.66853	0.502128	3.29686	0.00097771	0.0106462	Y	control
RPLP0	NM_053275	869	927	1075	1144	42	40	11	15	25.5468	1.2945	0.488473	2.63857	0.00832575	0.0484707	Y	control
RPLP0	NM_053275	314	365	1069	1142	33	33	5	13	19.6966	1.46594	0.559344	2.60119	0.00929006	0.0520243	N	NA
RPLP0	NM_001002	362	441	684	769	31	36	3	9	18.3788	1.97482	0.595155	3.26296	0.00110256	0.0115083	Y	control
RPLP0	NM_001002	196	285	1037	1089	30	22	6	14	16.9875	1.00474	0.57893	1.72863	0.0838757	0.231182	N	NA
RPLP0	NM_001002	855	948	1043	1094	22	17	5	10	12.769	0.971648	0.635891	1.52073	0.128327	0.302631	N	NA
SRSF9	NM_003769	144	217	305	365	16	10	14	10	12.4256	-0.146822	0.632821	-0.232048	0.816501	0.89767	N	NA
ARL6IP4	NM_001278380	649	752	827	912	26	12	15	18	17.3817	-0.0644206	0.564746	-0.114053	0.909196	0.951177	N	NA
UBC	NM_021009	1655	1729	1910	1988	355	390	292	284	325.893	0.107743	0.170517	0.631862	0.527477	0.699601	N	NA
UBC	NM_021009	887	963	1340	1394	315	318	201	215	256.276	0.341251	0.17694	1.92856	0.0537859	0.175767	N	NA
UBC	NM_021009	601	663	959	998	210	183	132	143	163.318	0.247333	0.210088	1.17724	0.239099	0.443713	N	NA
UBC	NM_021009	1583	1647	2367	2431	182	157	156	149	159.597	-0.115041	0.215793	-0.533115	0.593954	0.757582	N	NA
UBC	NM_021009	851	929	2331	2368	200	156	101	140	145.009	0.298884	0.228454	1.3082	0.190806	0.382045	N	NA
UBC	NM_021009	1437	1524	2066	2145	32	33	24	35	30.5808	-0.104551	0.438668	-0.238335	0.811621	0.89767	N	NA
UBC	NM_021009	848	910	1822	1911	29	25	28	31	28.1821	-0.366755	0.450997	-0.813153	0.416131	0.609174	N	NA
UBC	NM_021009	848	910	2050	2139	29	24	28	31	27.9452	-0.392598	0.453017	-0.866543	0.386192	0.581131	N	NA
UBC	NM_021009	617	663	1607	1727	31	14	18	35	24.1245	-0.45373	0.512876	-0.884288	0.376541	0.573096	N	NA
PGAM5	NM_001170544	36	132	192	283	23	17	10	8	13.9271	0.76574	0.610162	1.25193	0.210597	0.40659	N	NA
PGAM5	NM_001170543	36	113	190	283	23	15	10	5	12.6913	0.898807	0.64476	1.38935	0.164727	0.350517	N	NA
HMGB1	NM_001313893	1220	1282	1489	1555	31	29	13	6	18.8592	1.22946	0.566176	2.16146	0.0306599	0.117319	N	NA
HMGB1	NM_001313893	1218	1286	1425	1487	26	21	7	4	13.6361	1.557	0.639667	2.40599	0.0161287	0.0762702	N	NA
ARGLU1	NM_018011	177	252	433	515	23	16	16	19	18.2252	-0.0999774	0.541549	-0.184606	0.853538	0.919756	N	NA
HMGB1	NM_001313892	463	528	725	792	24	27	8	5	15.1693	1.4837	0.613277	2.39695	0.0165323	0.076947	N	NA
HMGB1	NM_002128	466	531	728	795	24	27	8	5	15.1693	1.4837	0.613277	2.39695	0.0165323	0.076947	N	NA
ELMSAN1	NM_194278	3824	3918	4214	4270	18	14	24	19	18.992	-0.637612	0.538915	-1.18251	0.237002	0.442873	N	NA
ELMSAN1	NM_001043318	3455	3539	3835	3889	15	12	23	16	16.8181	-0.725427	0.569371	-1.27304	0.203002	0.395687	N	NA
RPPH1	NR_002312	51	147	262	341	231	223	240	285	244.729	-0.464118	0.177899	-2.60884	0.00908487	0.0512004	N	NA
RPPH1	NR_002312	12	80	168	263	135	146	170	199	163.604	-0.641051	0.213644	-3.00036	0.0026966	0.0210478	Y	arsenite
HNRNPC	NM_004500	625	694	937	1020	21	19	11	10	14.767	0.584501	0.591137	0.98741	0.323442	0.532727	N	NA
HNRNPC	NM_031314	626	691	933	1015	39	27	15	15	22.9801	0.795514	0.502529	1.58026	0.114047	0.282983	N	NA
HNRNPC	NM_031314	1058	1135	1247	1319	19	16	9	11	13.2984	0.477209	0.612119	0.77867	0.436174	0.626557	N	NA
HNRNPC	NM_031314	443	562	601	721	12	16	12	10	12.4026	0.0738112	0.63078	0.117039	0.906829	0.950286	N	NA
HNRNPC	NM_001077443	554	624	868	938	33	24	15	17	21.4817	0.518432	0.5104	1.01483	0.310186	0.522825	N	NA
HNRNPC	NM_001077443	1003	1080	1183	1254	19	17	8	7	12.229	0.855089	0.638559	1.33449	0.182044	0.374342	N	NA
HNRNPC	NM_001077442	584	661	905	988	35	23	12	13	19.7905	0.855394	0.535373	1.59401	0.110933	0.277176	N	NA
HNRNPC	NM_001077442	417	536	575	695	12	16	12	10	12.4026	0.0738112	0.63078	0.117039	0.906829	0.950286	N	NA
PABPN1	NM_004643	1409	1490	1563	1664	73	51	49	34	50.6969	0.282307	0.370995	0.760882	0.446727	0.634033	N	NA
PABPN1	NM_004643	1285	1358	1486	1577	49	54	42	52	48.7663	-0.117871	0.357972	-0.329282	0.741943	0.858221	N	NA
PABPN1	NM_004643	2347	2416	2618	2702	18	25	23	24	22.5775	-0.352705	0.502168	-0.702388	0.482437	0.660216	N	NA
PABPN1	NM_004643	2631	2687	2945	3010	16	14	16	12	14.4612	-0.155821	0.594749	-0.262049	0.793284	0.888478	N	NA
BCL2L2-PABPN1	NM_001199864	1375	1438	1651	1744	15	18	8	18	14.3965	0.0961463	0.604921	0.158889	0.873756	0.932994	N	NA
PNN	NM_002687	207	269	476	543	30	16	17	15	19.011	0.21799	0.544365	0.400351	0.688898	0.821268	N	NA
RN7SL3	NR_145670	64	134	217	289	707	646	356	403	511.351	0.56903	0.135247	4.20717	2.58588926946145e-05	0.000624864	Y	control
RN7SL3	NR_145670	4	95	180	261	315	351	157	196	246.503	0.655678	0.187286	3.50055	0.000464304	0.00634909	Y	control
ARF6	NM_001663	177	280	334	420	19	17	19	22	19.2304	-0.4089	0.52825	-0.773939	0.438967	0.627735	N	NA
ARF6	NM_001663	205	288	579	634	20	13	21	19	18.317	-0.500966	0.545075	-0.918784	0.358208	0.559642	N	NA
SRSF5	NM_001039465	61	145	270	331	44	41	30	16	31.9807	0.562766	0.454341	1.23806	0.215694	0.413121	N	NA
SRSF5	NM_001039465	40	145	270	374	9	6	18	18	13.1589	-1.32807	0.628883	-2.09967	0.0357582	0.130374	N	NA
YY1	NM_003403	671	753	953	1021	23	20	26	28	24.3596	-0.549939	0.480683	-1.14373	0.252737	0.459144	N	NA
YY1	NM_003403	413	518	655	734	24	20	17	23	20.6949	-0.110632	0.513371	-0.215493	0.829383	0.900634	N	NA
YY1	NM_003403	851	915	980	1089	20	19	10	15	15.5312	0.34628	0.577752	0.598944	0.54921	0.713407	N	NA
HSP90AA1	NM_005348	890	949	1080	1166	28	25	13	9	18.026	0.891576	0.55751	1.59518	0.110673	0.277176	N	NA
TNFAIP2	NM_006291	476	564	773	879	23	28	30	28	27.4146	-0.417436	0.462315	-0.902907	0.366575	0.567221	N	NA
TNFAIP2	NM_006291	1995	2088	2545	2591	25	17	17	17	18.676	0.029201	0.537748	0.0543003	0.956696	0.976062	N	NA
CKB	NM_001823	1055	1158	1237	1325	22	22	2	10	13.0831	1.39699	0.659216	2.09806	0.0358997	0.130571	N	NA
CKB	NM_001823	451	540	674	761	19	21	2	8	11.6901	1.47834	0.68073	2.14447	0.0319949	0.120854	N	NA
GOLGA8B	NR_027410	3198	3280	3468	3548	99	78	104	112	98.4768	-0.542752	0.263414	-2.06029	0.0393705	0.141004	N	NA
GOLGA8B	NR_027410	3511	3611	3748	3802	57	58	39	75	56.4148	-0.22021	0.353474	-0.622958	0.533312	0.704937	N	NA
GOLGA8B	NR_027410	2514	2576	3358	3432	59	48	32	44	44.5722	0.224926	0.373048	0.602849	0.546609	0.713122	N	NA
GOLGA8B	NR_027410	2853	2941	3052	3132	32	31	21	37	29.7451	-0.119021	0.4493	-0.264886	0.791097	0.888285	N	NA
GOLGA8B	NR_027410	3866	3969	4096	4164	28	25	30	35	29.5624	-0.521869	0.442601	-1.17883	0.238468	0.443713	N	NA
GOLGA8B	NR_027410	1045	1114	1591	1673	33	36	18	28	27.9886	0.314814	0.458944	0.685717	0.492892	0.665845	N	NA
GOLGA8B	NR_027410	231	357	554	579	38	20	25	14	23.7527	0.251165	0.517313	0.485468	0.627344	0.78042	N	NA
GOLGA8B	NR_027410	1323	1435	2004	2123	20	13	27	28	22.3438	-0.926155	0.506464	-1.8261	0.0678358	0.201996	N	NA
GOLGA8B	NR_027410	2195	2271	2516	2585	25	13	20	21	19.615	-0.350778	0.535135	-0.655376	0.512225	0.685038	N	NA
GOLGA8B	NR_027410	893	960	1189	1272	14	7	14	21	14.0777	-0.875619	0.611771	-1.42827	0.153213	0.335321	N	NA
GOLGA8B	NR_027410	1460	1572	1821	1872	8	10	18	17	13.6363	-1.06526	0.6156	-1.72537	0.0844605	0.232069	N	NA
ZNF609	NM_015042	221	290	509	576	13	13	14	13	13.2503	-0.280688	0.610811	-0.459571	0.645824	0.790585	N	NA
ARIH1	NM_005744	131	224	368	446	12	8	17	15	13.2284	-0.831575	0.619146	-1.34081	0.179982	0.371331	N	NA
CHD2	NM_001271	850	955	1096	1164	6	10	13	21	12.7703	-1.14021	0.638883	-1.77793	0.0754148	0.217524	N	NA
LINC00923	NR_024172	886	929	1031	1136	21	24	24	18	21.7543	-0.156292	0.510988	-0.305924	0.759662	0.869594	N	NA
LINC00923	NR_024172	843	929	1031	1085	20	15	22	21	19.5888	-0.517893	0.527711	-0.981086	0.32655	0.534098	N	NA
LINC00923	NR_024173	714	757	859	963	21	24	25	18	22.0444	-0.188773	0.509849	-0.370329	0.711137	0.835864	N	NA
LINC00923	NR_024173	671	757	859	913	20	15	22	21	19.5888	-0.517893	0.527711	-0.981086	0.32655	0.534098	N	NA
UBE3A	NM_130839	130	196	425	533	5	18	14	18	13.9769	-0.607339	0.63975	-0.949049	0.342596	0.547464	N	NA
GOLGA8A	NR_027409	1031	1112	1557	1632	65	69	45	66	60.2018	0.0210677	0.330095	0.0638221	0.949112	0.972826	N	NA
GOLGA8A	NR_027409	3209	3282	3466	3527	56	47	60	73	59.1765	-0.609554	0.328088	-1.85756	0.0632322	0.193727	N	NA
GOLGA8A	NR_027409	2140	2235	2418	2507	53	46	55	57	52.7765	-0.428013	0.344244	-1.24327	0.213768	0.410669	N	NA
GOLGA8A	NR_027409	3524	3621	3763	3816	43	44	31	65	45.2141	-0.362518	0.391858	-0.925021	0.354955	0.558366	N	NA
GOLGA8A	NR_027409	2498	2566	3210	3304	42	34	13	34	29.533	0.421718	0.47133	0.894161	0.371236	0.570435	N	NA
GOLGA8A	NR_027409	2876	2955	3066	3148	29	27	20	35	27.3516	-0.206407	0.464538	-0.44429	0.656833	0.799847	N	NA
GOLGA8A	NR_027409	1332	1449	2018	2145	25	16	28	33	25.6946	-0.780756	0.4769	-1.63578	0.101886	0.260953	N	NA
GOLGA8A	NR_027409	1481	1576	1851	1898	15	21	26	25	22.1063	-0.697711	0.50949	-1.36872	0.171087	0.361435	N	NA
GOLGA8A	NR_027409	3903	4004	4125	4179	22	23	19	22	21.2995	-0.11361	0.506827	-0.224171	0.822624	0.89767	N	NA
GOLGA8A	NR_027409	246	371	568	606	27	15	20	12	18.2342	0.0882362	0.561415	0.157177	0.875105	0.933869	N	NA
GOLGA8A	NM_181077	953	1036	1222	1284	47	42	52	73	53.7279	-0.717986	0.345763	-2.07586	0.0379069	0.136807	N	NA
GOLGA8A	NM_181077	1261	1359	1501	1554	43	44	31	64	44.9601	-0.34871	0.391405	-0.890824	0.373023	0.571192	N	NA
GOLGA8A	NM_181077	608	693	803	884	27	26	18	34	25.8486	-0.201069	0.478361	-0.420288	0.674275	0.811707	N	NA
GOLGA8A	NM_181077	1642	1744	1860	1918	23	23	21	23	22.3496	-0.181331	0.496629	-0.365143	0.715005	0.838052	N	NA
GOLGA8B	NM_001023567	946	1022	1229	1319	81	63	88	102	83.8549	-0.648619	0.282849	-2.29281	0.0218592	0.0941144	N	NA
GOLGA8B	NM_001023567	1260	1362	1502	1554	49	50	32	68	48.9834	-0.241419	0.38055	-0.634348	0.525854	0.698496	N	NA
GOLGA8B	NM_001023567	608	692	804	886	32	30	21	40	30.2704	-0.207019	0.449738	-0.460269	0.645323	0.790585	N	NA
GOLGA8B	NM_001023567	1624	1729	1852	1916	27	23	31	27	27.1303	-0.453658	0.462495	-0.980791	0.326696	0.534098	N	NA
GOLGA8B	NM_001023567	300	376	1056	1144	26	26	10	20	19.7554	0.499597	0.534945	0.932954	0.350844	0.556054	N	NA
SNX22	NR_073534	2250	2326	2905	2952	60	36	10	12	27.4351	1.70776	0.495919	3.41738	0.000632259	0.00785426	Y	control
SNX22	NR_073534	2245	2326	2905	3012	17	20	9	7	12.7976	0.815666	0.631041	1.28889	0.197435	0.387835	N	NA
SNX22	NM_024798	2203	2279	2858	2905	60	36	10	12	27.4351	1.70776	0.495919	3.41738	0.000632259	0.00785426	Y	control
SNX22	NM_024798	2198	2279	2858	2965	17	20	9	7	12.7976	0.815666	0.631041	1.28889	0.197435	0.387835	N	NA
RPL4	NM_000968	672	748	1122	1202	79	92	29	35	56.1564	1.12077	0.349368	3.20334	0.00135845	0.0131181	Y	control
RPL4	NM_000968	1119	1194	1273	1349	65	78	19	32	46.1541	1.18577	0.388297	3.0476	0.00230677	0.0185806	Y	control
RPL4	NM_000968	236	324	442	499	42	30	17	19	25.935	0.67955	0.475214	1.42829	0.153209	0.335321	N	NA
RPLP1	NM_001003	97	173	309	419	46	45	8	15	26.7249	1.60072	0.493101	3.22414	0.00126352	0.0124822	Y	control
RPLP1	NM_001003	173	225	313	419	28	49	9	12	23.3122	1.48251	0.533251	2.76295	0.0057281	0.0368773	Y	control
DNM1P46	NR_003260	565	601	901	947	49	49	79	86	66.9519	-0.982906	0.313673	-3.1319	0.00173681	0.0153928	Y	arsenite
DNM1P46	NR_003260	517	579	735	803	44	37	54	72	52.2218	-0.861992	0.350277	-2.45962	0.0139086	0.0697011	N	NA
DNM1P46	NR_003260	736	802	913	957	33	29	64	49	45.0082	-1.09025	0.38628	-2.8197	0.0048069	0.0317579	Y	arsenite
WASH3P	NR_003659	1963	2039	2237	2326	29	21	22	30	25.2403	-0.29496	0.475737	-0.619939	0.535298	0.705439	N	NA
WASH3P	NR_003659	550	712	829	916	16	16	17	10	14.7168	-0.0311027	0.598268	-0.052005	0.958525	0.976726	N	NA
WASH3P	NR_003659	497	616	684	767	14	17	13	14	14.3777	-0.0508548	0.593461	-0.0857034	0.931702	0.961459	N	NA
WASH3P	NR_003659	817	922	1083	1144	23	13	13	4	12.8337	0.65651	0.658637	0.995406	0.319539	0.528273	N	NA
CBFB	NM_022845	58	137	227	311	16	16	14	20	16.3872	-0.304459	0.564107	-0.539659	0.589432	0.752902	N	NA
CBFB	NM_022845	1	57	201	293	16	13	10	20	14.5165	-0.260302	0.598066	-0.435119	0.663476	0.803275	N	NA
CBFB	NM_001755	48	129	211	300	16	16	12	20	15.8071	-0.220657	0.574525	-0.384027	0.700959	0.828748	N	NA
CBFB	NM_001755	1	56	201	294	13	12	10	19	13.3776	-0.400929	0.614792	-0.651863	0.51449	0.685986	N	NA
PRKCB	NM_002738	5	85	181	281	25	31	12	22	21.8118	0.439036	0.515728	0.850676	0.39495	0.58651	N	NA
PRKCB	NM_212535	5	86	183	281	25	34	12	23	22.7764	0.473751	0.511963	0.924644	0.355151	0.558366	N	NA
PRKCB	NM_212535	688	787	921	981	13	18	18	16	16.3569	-0.351807	0.570563	-0.616659	0.537459	0.706467	N	NA
SMG1P7	NR_033959	824	893	1002	1110	18	23	20	25	21.4877	-0.353437	0.509566	-0.693578	0.487947	0.661597	N	NA
SMG1P7	NR_033959	458	480	565	692	20	17	20	14	17.704	-0.141384	0.553485	-0.255495	0.798341	0.892442	N	NA
LUC7L	NM_018032	1038	1118	1746	1840	32	25	18	18	22.6268	0.362621	0.49752	0.728544	0.466281	0.647972	N	NA
PKD1P6-NPIPP1	NR_123721	1743	1803	1897	2003	31	34	25	22	27.589	0.188995	0.460047	0.410798	0.68122	0.817953	N	NA
PKD1P6-NPIPP1	NR_123721	1078	1171	1948	2031	22	26	15	18	19.8335	0.26124	0.525226	0.497253	0.619011	0.774282	N	NA
PKD1P6-NPIPP1	NR_123721	897	967	1138	1205	25	23	8	20	18.2488	0.483882	0.558483	0.865424	0.386806	0.581197	N	NA
PKD1P6-NPIPP1	NR_123721	2815	2906	3179	3286	18	17	11	18	15.6778	0.0192961	0.575489	0.0335256	0.973255	0.983235	N	NA
PKD1P6-NPIPP1	NR_123721	1385	1501	1650	1755	18	15	8	14	13.3177	0.291683	0.613958	0.474736	0.634975	0.785481	N	NA
SMG1P3	NR_027155	588	667	823	900	17	12	26	32	22.1852	-1.15866	0.510002	-2.26622	0.023438	0.0982059	N	NA
SMG1P3	NR_027155	101	210	379	450	17	18	26	19	20.3034	-0.579106	0.527076	-1.09842	0.272019	0.479646	N	NA
SMG1P3	NR_027155	3631	3709	3953	4037	14	17	14	29	18.4786	-0.636915	0.554093	-1.14865	0.250699	0.458961	N	NA
NPIPB5	NM_001135865	3339	3395	3565	3673	20	18	39	38	29.5492	-1.20354	0.452847	-2.65244	0.00799129	0.0468327	Y	arsenite
NPIPB5	NM_001135865	1562	1637	1877	2021	26	7	39	33	26.9696	-1.29979	0.516245	-2.51098	0.0120395	0.0635338	N	NA
NPIPB5	NM_001135865	3411	3473	3569	3625	14	9	36	19	20.4244	-1.39497	0.558171	-2.4892	0.0128029	0.0661076	N	NA
NPIPB5	NM_001135865	1041	1133	1190	1287	17	12	22	13	16.1978	-0.497938	0.582228	-0.855078	0.392508	0.58651	N	NA
NPIPB5	NM_001135865	2346	2416	2579	2663	19	12	15	12	14.3454	-0.0723601	0.598939	-0.120825	0.90383	0.949021	N	NA
TNRC6A	NM_001330520	3211	3286	3463	3540	15	6	21	8	12.7845	-0.662544	0.664064	-0.99697	0.318779	0.528273	N	NA
ATXN2L	NM_007245	3237	3298	3501	3601	30	13	30	20	23.3414	-0.469652	0.521448	-0.900494	0.367858	0.567221	N	NA
ATXN2L	NM_007245	3499	3595	3728	3805	16	13	6	17	12.5941	0.0835231	0.639003	0.130636	0.896064	0.945119	N	NA
FBRS	NM_001105079	101	222	322	384	5	4	20	25	14.1798	-2.20603	0.643165	-3.35363	0.000797581	0.00913593	Y	arsenite
PLCG2	NM_002661	7940	7980	8074	8156	50	40	49	60	49.7293	-0.517926	0.354386	-1.46125	0.143946	0.324658	N	NA
PLCG2	NM_002661	7954	8033	8100	8180	54	58	31	47	46.3328	0.261659	0.370827	0.705495	0.480502	0.659103	N	NA
CBFA2T3	NM_005187	1893	1995	2182	2283	23	23	5	9	14.152	1.27737	0.618441	2.05004	0.0403607	0.143824	N	NA
CBFA2T3	NM_005187	108	201	308	409	26	22	5	3	13.0388	1.94441	0.664184	2.86348	0.00419016	0.0288728	Y	control
ANKRD11	NM_001256182	7069	7140	7372	7464	15	12	32	27	22.2232	-1.28297	0.515035	-2.48335	0.0130155	0.0669368	N	NA
ANKRD11	NM_001256182	3819	3902	4045	4153	19	9	21	23	18.1698	-0.834699	0.556558	-1.49764	0.134228	0.31126	N	NA
ANKRD11	NM_001256182	3171	3243	3407	3506	15	14	19	23	17.91	-0.716654	0.546306	-1.31066	0.189974	0.381245	N	NA
ANKRD11	NM_001256182	5094	5166	5353	5442	9	15	10	19	13.2242	-0.437651	0.626688	-0.698144	0.485087	0.661303	N	NA
ANKRD11	NM_001256183	6994	7075	7299	7390	16	10	28	27	20.8053	-1.23362	0.528036	-2.3291	0.0198536	0.0873361	N	NA
ANKRD11	NM_001256183	3968	4048	4163	4232	9	12	18	16	14.0719	-0.839535	0.606632	-1.38196	0.166984	0.354464	N	NA
HBA1	NM_000558	78	135	245	329	18	28	8	8	14.8723	1.11251	0.609591	1.81605	0.0693621	0.204606	N	NA
HBA2	NM_000517	84	140	236	312	19	25	5	8	13.5076	1.30705	0.632746	2.04905	0.0404576	0.143824	N	NA
HBA2	NM_000517	184	251	359	433	17	16	10	7	12.1403	0.587067	0.638825	0.917619	0.358818	0.559642	N	NA
CAPN15	NM_005632	677	747	980	1074	12	31	22	32	24.445	-0.5097	0.521743	-0.976816	0.32866	0.534831	N	NA
CAPN15	NM_005632	122	225	339	425	22	19	9	10	14.4029	0.744929	0.598178	1.24237	0.214101	0.410669	N	NA
CAPN15	NM_005632	1604	1694	1823	1900	16	11	14	13	13.4246	-0.240551	0.609658	-0.39457	0.69316	0.824522	N	NA
RHOT2	NM_138769	1886	1952	2218	2302	36	41	20	22	28.8766	0.577588	0.452744	1.2748	0.202381	0.394912	N	NA
RHOT2	NM_138769	62	180	279	328	18	19	16	14	16.5855	0.0322551	0.562517	0.0573475	0.954268	0.974713	N	NA
RHOT2	NM_138769	1043	1134	1367	1454	19	27	6	15	16.0498	0.795975	0.595108	1.33402	0.182198	0.374342	N	NA
RHOT2	NM_138769	1361	1466	1701	1809	21	20	8	11	14.3877	0.751895	0.599184	1.25172	0.210671	0.40659	N	NA
CHTF18	NM_022092	2520	2586	2808	2901	33	14	14	13	17.807	0.458761	0.569783	0.804461	0.421131	0.612933	N	NA
CHTF18	NM_022092	31	136	195	306	23	14	8	10	13.1446	0.669782	0.622515	1.07352	0.283039	0.493848	N	NA
MAPK8IP3	NM_015133	3735	3815	3922	4048	23	19	9	16	16.1432	0.443579	0.573639	0.772461	0.439842	0.627735	N	NA
ZNF598	NM_178167	1137	1211	1362	1396	13	20	26	26	21.6916	-0.833179	0.517031	-1.61001	0.107396	0.271026	N	NA
ZNF598	NM_178167	1676	1767	1920	2021	12	16	8	26	15.3073	-0.437182	0.612163	-0.713802	0.475349	0.653559	N	NA
ZNF598	NM_178167	2469	2576	2649	2735	19	13	13	15	14.7644	-0.0666535	0.587377	-0.113471	0.909657	0.951177	N	NA
RPS2	NM_002952	92	192	620	690	74	81	30	31	51.745	1.04308	0.358479	2.90583	0.00366276	0.0259482	Y	control
RPS2	NM_002952	350	436	569	635	62	86	25	21	46.3465	1.35763	0.39673	3.41343	0.000641518	0.00790392	Y	control
RPS2	NM_002952	68	159	289	351	47	47	21	23	33.2177	0.787325	0.42703	1.84152	0.065546	0.198817	N	NA
PKD1	NM_001009944	810	881	1003	1086	36	26	38	28	32.0692	-0.349501	0.439783	-0.794718	0.426777	0.618143	N	NA
PKD1	NM_001009944	54	124	358	428	27	35	36	27	31.4227	-0.272589	0.445823	-0.61151	0.540862	0.708827	N	NA
PKD1	NM_001009944	1383	1470	1856	1937	15	18	25	28	21.8679	-0.862446	0.508397	-1.69455	0.0901607	0.242223	N	NA
PKD1	NM_001009944	3883	3976	4196	4269	22	13	19	32	21.4716	-0.73117	0.520628	-1.40305	0.1606	0.345185	N	NA
PKD1	NM_001009944	6832	6933	7118	7192	20	21	16	26	20.5399	-0.257461	0.519293	-0.49575	0.620071	0.77465	N	NA
PKD1	NM_001009944	1141	1219	1377	1441	19	13	26	21	20.0593	-0.758559	0.530214	-1.42942	0.152882	0.335321	N	NA
PKD1	NM_001009944	413	496	568	648	20	14	14	21	17.0316	-0.270047	0.558444	-0.483482	0.628754	0.78066	N	NA
PKD1	NM_001009944	1984	2057	2146	2234	11	11	22	21	16.6975	-1.10143	0.569219	-1.92972	0.0536418	0.175767	N	NA
PKD1	NM_001009944	4233	4329	4650	4741	11	12	19	23	16.5723	-1.00535	0.56845	-1.76469	0.0776155	0.221185	N	NA
PKD1	NM_001009944	5482	5548	5762	5830	10	10	12	26	14.6145	-1.01951	0.608668	-1.67039	0.094843	0.249706	N	NA
PKD1	NM_000296	51	119	357	426	25	33	35	27	30.2269	-0.339337	0.45232	-0.750287	0.453082	0.638377	N	NA
PKD1	NM_000296	1139	1216	1375	1441	22	11	26	21	20.2336	-0.722414	0.536652	-1.34506	0.178607	0.370066	N	NA
PKD1	NM_000296	1376	1443	1732	1818	13	14	20	21	17.2599	-0.776563	0.55608	-1.39504	0.163004	0.34811	N	NA
PKD1	NM_000296	413	496	568	648	18	12	11	21	15.2558	-0.305733	0.588746	-0.519116	0.60368	0.764084	N	NA
PKD1	NM_000296	6815	6900	7111	7164	13	13	11	16	13.1423	-0.267722	0.612871	-0.436786	0.662267	0.802913	N	NA
ERVK13-1	NR_040023	2749	2798	6062	6175	18	16	18	14	16.4551	-0.167526	0.565887	-0.296092	0.76716	0.874205	N	NA
SRRM2	NM_016333	464	559	677	771	111	80	109	150	112.647	-0.68599	0.256502	-2.67401	0.00749492	0.0449695	Y	arsenite
SRRM2	NM_016333	399	517	790	832	85	66	58	51	63.7709	0.190058	0.323249	0.587937	0.556574	0.72085	N	NA
SRRM2	NM_016333	2075	2143	2292	2371	47	48	41	43	44.3367	-0.0806457	0.371491	-0.217095	0.828134	0.900634	N	NA
SRRM2	NM_016333	8796	8866	9142	9215	36	28	55	51	43.3171	-0.955021	0.383435	-2.48882	0.0128168	0.0661076	N	NA
SRRM2	NM_016333	5900	6000	6201	6280	42	34	41	43	39.9409	-0.392373	0.389285	-1.00787	0.313517	0.52471	N	NA
SRRM2	NM_016333	8499	8586	8694	8767	38	14	24	24	24.5821	-0.156975	0.51102	-0.307152	0.758728	0.869088	N	NA
SRRM2	NM_016333	1101	1187	1317	1375	19	27	17	23	21.2728	-0.0404353	0.515661	-0.0784178	0.937496	0.964762	N	NA
SRRM2	NM_016333	4110	4213	4375	4453	10	17	18	25	17.7586	-0.818991	0.561737	-1.45633	0.145301	0.325669	N	NA
SRRM2	NM_016333	3615	3684	3890	3962	13	17	12	23	16.1582	-0.408513	0.578389	-0.706101	0.480125	0.659098	N	NA
SRRM2	NM_016333	5465	5549	5819	5908	16	18	17	9	14.9364	0.0937499	0.600071	0.156278	0.875814	0.93406	N	NA
SRRM2	NM_016333	6390	6470	6618	6670	15	15	15	9	13.4298	0.0369452	0.617118	0.0598853	0.952247	0.973776	N	NA
PKMYT1	NM_001258451	800	877	1073	1141	15	12	14	10	12.6833	-0.0952093	0.625023	-0.152365	0.878899	0.935089	N	NA
C16orf72	NM_014117	77	147	355	418	51	46	115	124	86.7694	-1.52637	0.286088	-5.32853	9.90085066214e-08	6.0224484717293e-06	Y	arsenite
C16orf72	NM_014117	317	390	587	661	28	29	74	80	54.7046	-1.63038	0.353795	-4.59725	4.28103535973061e-06	0.000159803	Y	arsenite
GSPT1	NM_001130006	46	107	263	347	21	16	5	9	12.0621	0.982323	0.647324	1.50981	0.131091	0.307098	N	NA
GSPT1	NM_002094	50	108	267	347	20	17	5	8	11.8289	1.07012	0.651682	1.63216	0.102646	0.262129	N	NA
LOC100288162	NR_103772	302	408	474	564	30	24	32	29	28.8133	-0.419677	0.450457	-0.931591	0.351548	0.556299	N	NA
LOC100288162	NR_103772	608	688	781	892	31	35	21	27	27.9359	0.193131	0.455871	0.423594	0.671862	0.81014	N	NA
LOC100288162	NR_103772	18	78	248	326	20	20	17	33	22.3715	-0.517262	0.50951	-1.0148	0.310199	0.522825	N	NA
PKD1P1	NR_036447	3015	3084	3190	3292	41	39	43	46	42.2514	-0.398335	0.378966	-1.05106	0.293231	0.506535	N	NA
PKD1P1	NR_036447	1309	1400	1576	1653	30	32	42	45	37.6735	-0.711925	0.401674	-1.77172	0.0764414	0.219614	N	NA
PKD1P1	NR_036447	2673	2753	2990	3050	19	16	27	50	28.4276	-1.28588	0.473149	-2.7108	0.00671209	0.0409693	Y	arsenite
PKD1P1	NR_036447	557	638	832	923	21	23	23	39	26.5627	-0.686817	0.473597	-1.44938	0.147233	0.326174	N	NA
PKD1P1	NR_036447	183	267	487	567	20	15	37	21	23.9396	-0.93337	0.512086	-1.82061	0.0686664	0.203234	N	NA
PKD1P1	NR_036447	3318	3390	3561	3625	21	16	16	22	18.5554	-0.270327	0.537585	-0.502795	0.615109	0.771181	N	NA
PKD1P1	NR_036447	3981	4045	4368	4442	15	18	22	20	18.9653	-0.554298	0.536912	-1.0321	0.302023	0.516249	N	NA
PKD1P1	NR_036447	2400	2477	2665	2732	23	20	14	16	17.8303	0.231955	0.544803	0.425638	0.670372	0.809956	N	NA
PKD1P1	NR_036447	2171	2226	2426	2526	13	14	16	15	14.5754	-0.410174	0.590699	-0.694332	0.487474	0.661597	N	NA
PKD1P1	NR_036447	1724	1816	1969	2019	11	11	18	17	14.5211	-0.825677	0.595329	-1.38493	0.166073	0.352955	N	NA
PKD1P1	NR_036447	4854	4938	5096	5187	11	10	23	13	14.7183	-0.931348	0.608437	-1.52801	0.126509	0.300745	N	NA
PKD1P1	NR_036447	5143	5281	5367	5422	12	11	18	12	13.4668	-0.57822	0.616268	-0.937877	0.348308	0.554026	N	NA
LOC100190986	NR_024456	1811	1878	2227	2309	18	19	34	28	25.3632	-0.939683	0.483051	-1.94309	0.0520052	0.171151	N	NA
LOC100190986	NR_024456	912	978	1208	1260	14	17	20	27	19.7108	-0.773263	0.530154	-1.45718	0.145065	0.325669	N	NA
LOC100190986	NR_024456	1911	1970	2126	2185	11	11	33	20	19.634	-1.39356	0.556059	-2.49583	0.0125662	0.0655821	N	NA
LOC100190986	NR_024456	706	772	897	994	11	13	15	19	14.6327	-0.667312	0.592137	-1.12602	0.260159	0.466857	N	NA
NPIPB3	NM_130464	3128	3188	3362	3477	19	15	36	36	27.2444	-1.25731	0.469888	-2.66923	0.00760259	0.0452617	Y	arsenite
NPIPB3	NM_130464	3207	3268	3366	3422	16	12	39	21	22.9452	-1.26565	0.529493	-2.38381	0.0171345	0.0793311	N	NA
NPIPB3	NM_130464	844	930	987	1082	14	11	21	16	15.7852	-0.750255	0.580564	-1.29097	0.196713	0.387387	N	NA
SLC7A5P2	NR_002594	92	166	277	367	18	8	33	42	26.0247	-1.65431	0.500241	-3.28943	0.00100392	0.0107328	Y	arsenite
SLC7A5P2	NR_002594	43	131	445	521	15	7	26	22	18.0284	-1.26066	0.568077	-2.21094	0.0270399	0.107846	N	NA
SLC7A5P2	NR_002594	282	361	472	549	12	12	17	21	15.7001	-0.819185	0.576792	-1.41826	0.156116	0.339987	N	NA
NPIPB4	NM_001310148	3544	3604	3778	3893	17	15	34	33	25.4701	-1.23548	0.482638	-2.55353	0.0106637	0.0589682	N	NA
NPIPB4	NM_001310148	3622	3683	3781	3838	16	12	38	22	22.9092	-1.2653	0.525653	-2.40048	0.0163735	0.0766124	N	NA
SMG1P1	NR_027154	580	647	803	904	15	7	23	15	15.3798	-0.951228	0.603773	-1.57226	0.11589	0.285518	N	NA
SMG1P1	NR_027154	3540	3601	3875	3943	10	10	13	22	13.8883	-0.922107	0.610313	-1.50752	0.131678	0.307891	N	NA
TUFM	NM_003321	153	234	372	429	21	25	2	10	13.5776	1.45897	0.654866	2.20442	0.027495	0.108991	N	NA
SPN	NM_003123	978	1081	1180	1257	30	22	12	17	19.4899	0.528718	0.53196	0.992828	0.320794	0.529355	N	NA
SPN	NM_001030288	1021	1114	1219	1309	37	43	17	16	27.1717	0.945139	0.471948	1.99862	0.0456495	0.155455	N	NA
NPIPB13	NM_001321892	3327	3389	3497	3554	18	15	35	22	23.1815	-0.982613	0.512351	-1.91522	0.0554649	0.179274	N	NA
NPIPB13	NM_001321892	990	1047	1161	1223	23	6	12	13	13.1723	-0.0652289	0.646848	-0.100814	0.919698	0.956009	N	NA
ZNF768	NM_024671	1575	1672	1877	1935	15	11	19	16	15.421	-0.626435	0.582396	-1.07492	0.282412	0.493243	N	NA
RNF40	NM_001207033	3046	3124	3261	3315	14	13	9	15	12.5242	-0.0690167	0.625151	-0.110384	0.912105	0.952043	N	NA
LOC102723753	NR_135178	3207	3275	3468	3562	14	8	28	20	18.1212	-1.26323	0.567159	-2.21925	0.0264696	0.107093	N	NA
AARS	NM_001605	1298	1355	1528	1616	14	7	19	29	17.5604	-1.2982	0.572034	-2.25981	0.0238332	0.099625	N	NA
EXOSC6	NM_058219	192	280	435	551	5	11	15	20	13.1171	-1.1781	0.6379	-1.83977	0.0658023	0.198817	N	NA
ST3GAL2	NM_006927	2028	2110	2248	2320	20	18	10	20	16.5647	0.0860297	0.569024	0.151144	0.879862	0.93555	N	NA
ST3GAL2	NM_006927	509	589	684	769	19	20	14	10	15.442	0.37996	0.584032	0.6503	0.515499	0.686812	N	NA
ST3GAL2	NM_006927	3327	3387	3540	3598	22	10	9	18	14.3038	-0.0128704	0.614039	-0.0209513	0.983284	0.990585	N	NA
ST3GAL2	NM_006927	65	191	280	368	24	18	6	10	13.7279	0.989265	0.617747	1.59412	0.11091	0.277176	N	NA
KARS	NM_001130089	40	111	291	343	20	20	5	9	12.7935	1.09145	0.636051	1.70589	0.0880285	0.238865	N	NA
GSE1	NM_001278184	831	882	1021	1120	20	18	21	20	19.7552	-0.344277	0.523573	-0.657539	0.510834	0.684216	N	NA
GSE1	NM_001278184	1073	1169	1257	1324	20	24	13	14	17.3315	0.402776	0.555446	0.724708	0.468631	0.649015	N	NA
GSE1	NM_001278184	1883	1980	2155	2223	12	13	10	16	12.6363	-0.263768	0.623621	-0.42291	0.672361	0.81014	N	NA
GSE1	NM_001134473	784	860	978	1075	33	27	27	33	29.7378	-0.246012	0.441043	-0.557781	0.576994	0.740231	N	NA
GSE1	NM_001134473	1931	2025	2171	2264	29	26	17	32	25.4824	-0.0737646	0.480433	-0.153521	0.877987	0.935089	N	NA
GSE1	NM_001134473	960	1070	1192	1266	26	26	16	20	21.4957	0.251474	0.506059	0.496789	0.619338	0.774282	N	NA
GSE1	NM_001134473	1310	1400	1477	1589	21	26	13	13	17.7672	0.536736	0.552896	0.969837	0.332128	0.537992	N	NA
GSE1	NM_001134473	3011	3092	3163	3262	15	19	9	11	13.145	0.447931	0.617623	0.724541	0.468733	0.649015	N	NA
GSE1	NM_014615	1321	1421	1515	1586	37	44	20	23	30.0571	0.617599	0.446914	1.38079	0.167344	0.354802	N	NA
GSE1	NM_014615	1042	1101	1241	1339	28	27	30	31	29.0199	-0.387412	0.446015	-0.868561	0.385087	0.581069	N	NA
GSE1	NM_014615	165	236	308	384	19	25	17	18	19.5288	0.0679785	0.530174	0.128226	0.89797	0.945119	N	NA
GSE1	NM_014615	2109	2200	2374	2445	19	20	11	19	16.8584	0.11927	0.562055	0.212153	0.831988	0.902044	N	NA
COX4I1	NM_001318794	504	561	843	923	35	38	10	15	23.2711	1.1888	0.507391	2.33369	0.019612	0.0867058	N	NA
COX4I1	NM_001318794	436	561	843	911	20	22	17	16	18.5262	0.0767072	0.538426	0.142473	0.886706	0.941125	N	NA
SLC7A5	NM_003486	145	241	542	590	14	19	11	24	16.8119	-0.282192	0.574925	-0.490755	0.623599	0.776309	N	NA
SLC7A5	NM_003486	114	185	305	395	21	14	12	18	15.9053	-0.033772	0.57387	-0.0588397	0.95308	0.974063	N	NA
ZC3H18	NM_001294340	1564	1625	2009	2076	15	12	18	19	16.13	-0.645057	0.568898	-1.13303	0.2572	0.464382	N	NA
ZC3H18	NM_001294340	1480	1554	1711	1792	19	15	15	13	15.31	0.00571371	0.579918	0.00985335	0.992138	0.994958	N	NA
ZC3H18	NM_144604	113	177	305	382	14	15	9	13	12.4897	0.128439	0.624924	0.20548	0.837197	0.906578	N	NA
CYBA	NM_000101	202	254	467	552	26	17	5	4	12.1086	1.66325	0.669358	2.44618	0.0144378	0.0715401	N	NA
LOC100289580	NR_103774	482	555	676	754	22	24	9	12	16.0952	0.782337	0.575816	1.35541	0.175288	0.367557	N	NA
LOC100289580	NR_103774	1253	1316	1517	1577	14	18	13	17	15.3767	-0.138991	0.58018	-0.239583	0.810654	0.89767	N	NA
PIEZO1	NM_001142864	4161	4247	4624	4704	179	128	130	130	139.713	-0.03198	0.233479	-0.136972	0.891053	0.943764	N	NA
PIEZO1	NM_001142864	4822	4909	5204	5270	148	131	98	145	128.257	-0.0533936	0.239763	-0.22269	0.823777	0.898046	N	NA
PIEZO1	NM_001142864	5716	5822	5972	6048	111	98	102	107	103.955	-0.2601	0.254929	-1.02029	0.307592	0.520815	N	NA
PIEZO1	NM_001142864	194	296	505	597	55	63	46	60	55.3865	-0.0937401	0.340907	-0.274977	0.783334	0.882003	N	NA
PIEZO1	NM_001142864	2452	2515	2700	2783	45	56	37	36	42.8608	0.199703	0.384786	0.518978	0.603776	0.764084	N	NA
PIEZO1	NM_001142864	2110	2179	2443	2510	54	44	32	35	40.2583	0.26986	0.388191	0.695056	0.48702	0.661597	N	NA
PIEZO1	NM_001142864	7402	7474	7706	7768	43	32	21	33	31.3416	0.204308	0.438274	0.466058	0.641174	0.788175	N	NA
PIEZO1	NM_001142864	6117	6228	6559	6637	33	31	19	22	25.5701	0.355245	0.471163	0.753683	0.45104	0.637527	N	NA
PIEZO1	NM_001142864	1083	1169	1316	1403	31	23	17	26	23.6795	0.0658512	0.49004	0.134359	0.893119	0.944923	N	NA
PIEZO1	NM_001142864	3846	3930	4053	4124	19	21	19	19	19.4156	-0.170735	0.527559	-0.32367	0.746188	0.861437	N	NA
PIEZO1	NM_001142864	3571	3671	4600	4666	15	16	13	18	15.3731	-0.22423	0.577903	-0.387998	0.698017	0.827037	N	NA
PIEZO1	NM_001142864	6809	6891	7066	7145	23	22	9	6	14.3132	1.14361	0.613793	1.85324	0.0638479	0.194858	N	NA
PIEZO1	NM_001142864	7060	7147	7468	7568	20	11	10	12	12.8743	0.193684	0.623728	0.310388	0.756266	0.867395	N	NA
PIEZO1	NM_001142864	1675	1764	1888	1954	18	7	12	13	12.3291	-0.24226	0.64242	-0.377012	0.706165	0.831558	N	NA
LOC100129697	NM_001290330	373	477	767	887	63	64	25	18	40.5898	1.22485	0.407571	2.99832	0.00271473	0.021096	Y	control
LOC100129697	NM_001290330	818	919	1092	1136	58	54	11	22	34.0969	1.42206	0.443693	3.19194	0.00141322	0.0134752	Y	control
LOC100129697	NM_001290330	1021	1092	1293	1376	32	26	10	12	19.0189	1.02628	0.543293	1.88237	0.0597858	0.18699	N	NA
LOC100129697	NM_001290330	639	757	1159	1240	24	18	11	9	14.9241	0.701443	0.593281	1.18003	0.237988	0.443713	N	NA
RPL13	NM_033251	481	558	683	754	53	54	16	17	33.1969	1.34982	0.438894	3.0643	0.00218179	0.0180689	Y	control
RPL13	NM_033251	315	375	491	571	43	44	14	19	28.5966	1.06769	0.461467	2.30769	0.0210165	0.0913129	N	NA
RPL13	NM_000977	309	380	506	581	59	61	18	18	36.9849	1.39388	0.420819	3.3007	0.000964435	0.0106142	Y	control
RPL13	NM_000977	127	191	303	386	58	55	13	24	35.422	1.28314	0.431654	2.96324	0.00304415	0.0227538	Y	control
NFE2L1	NM_001330261	1254	1361	1451	1546	11	9	14	23	14.4115	-1.00052	0.602938	-1.65498	0.0979286	0.25592	N	NA
NFE2L1	NM_003204	2701	2785	2905	2972	12	10	17	22	15.4805	-0.963358	0.58252	-1.65012	0.098919	0.256404	N	NA
NFE2L1	NM_003204	1267	1375	1465	1554	12	10	13	25	15.0825	-0.912336	0.595673	-1.5284	0.126413	0.300745	N	NA
PFN1	NM_005022	558	639	719	816	28	28	9	7	17.0683	1.36702	0.578857	2.34522	0.019016	0.0848312	N	NA
PFN1	NM_005022	653	723	842	931	32	22	6	9	16.1491	1.39854	0.593329	2.33815	0.0193795	0.0858931	N	NA
GOSR1	NM_004871	1439	1559	1639	1714	54	45	26	15	33.6737	0.92741	0.444224	2.08469	0.0370979	0.134375	N	NA
GOSR1	NM_004871	1587	1679	1783	1849	34	40	13	11	23.3828	1.24765	0.510245	2.43503	0.0148906	0.0728339	N	NA
GOSR1	NM_004871	2293	2391	2441	2533	20	10	22	14	16.6262	-0.495354	0.582203	-0.850591	0.394997	0.58651	N	NA
GOSR1	NM_004871	1243	1318	1487	1553	14	6	27	18	16.8494	-1.29365	0.592382	-2.17479	0.0296459	0.115925	N	NA
GOSR1	NM_004871	1655	1763	2114	2174	20	17	11	14	15.0936	0.271456	0.581889	0.466289	0.641009	0.788175	N	NA
GOSR1	NM_001007025	1433	1553	1633	1708	54	44	26	15	33.4369	0.912676	0.445577	2.04542	0.0408139	0.14428	N	NA
GOSR1	NM_001007025	1575	1666	1777	1837	34	39	13	10	22.8918	1.27997	0.51637	2.46772	0.0135975	0.0685315	N	NA
GOSR1	NM_001007025	2286	2385	2434	2526	20	9	22	14	16.3894	-0.538994	0.589046	-0.914661	0.36037	0.56107	N	NA
GOSR1	NM_001007025	1237	1313	1481	1545	14	6	26	18	16.5593	-1.26285	0.593965	-2.1177	0.0342006	0.125687	N	NA
GOSR1	NM_001007025	1649	1757	2108	2169	20	14	10	12	13.5849	0.317013	0.607525	0.521466	0.602042	0.763481	N	NA
GOSR1	NM_001007024	1455	1575	1655	1730	54	44	26	15	33.4369	0.912676	0.445577	2.04542	0.0408139	0.14428	N	NA
GOSR1	NM_001007024	1597	1688	1799	1859	34	39	13	10	22.8918	1.27997	0.51637	2.46772	0.0135975	0.0685315	N	NA
GOSR1	NM_001007024	2308	2407	2456	2548	20	9	22	14	16.3894	-0.538994	0.589046	-0.914661	0.36037	0.56107	N	NA
GOSR1	NM_001007024	1259	1335	1503	1567	14	6	26	18	16.5593	-1.26285	0.593965	-2.1177	0.0342006	0.125687	N	NA
GOSR1	NM_001007024	1671	1779	2130	2191	20	14	10	12	13.5849	0.317013	0.607525	0.521466	0.602042	0.763481	N	NA
AATF	NM_012138	691	765	877	950	29	20	2	4	12.597	2.28158	0.690226	3.18372	0.00145395	0.0136424	Y	control
PSMD3	NM_002809	173	276	357	437	41	44	22	14	29.2147	0.899456	0.465836	1.92782	0.0538772	0.175767	N	NA
PSMD3	NM_002809	77	137	214	328	17	18	14	13	15.2985	0.0976855	0.579478	0.16858	0.866127	0.928079	N	NA
FAM117A	NM_030802	199	263	433	492	13	14	14	9	12.4709	-0.0385264	0.631693	-0.0610113	0.95135	0.973423	N	NA
TLK2	NM_001284333	701	799	988	1031	18	6	22	20	16.7712	-0.970447	0.58925	-1.64337	0.100306	0.258683	N	NA
TLK2	NM_001330418	108	178	421	516	18	24	27	28	24.5171	-0.597421	0.485824	-1.22935	0.218942	0.417077	N	NA
TLK2	NM_001330418	225	273	357	514	24	17	19	25	21.0726	-0.333997	0.511912	-0.652348	0.514177	0.685986	N	NA
TLK2	NM_006852	688	802	991	1032	16	6	21	16	15.0329	-0.913322	0.610104	-1.49402	0.13517	0.311425	N	NA
BPTF	NM_182641	69	175	405	503	13	16	21	20	17.7696	-0.685629	0.551615	-1.24215	0.214181	0.410669	N	NA
CSNK1D	NR_110578	109	182	328	381	12	13	19	18	15.7549	-0.739063	0.576607	-1.28053	0.20036	0.391401	N	NA
RILP	NM_031430	526	611	795	888	11	20	15	17	15.7825	-0.259187	0.58484	-0.443252	0.657583	0.799847	N	NA
ACADVL	NM_001270448	114	217	292	406	45	30	17	19	26.5829	0.733118	0.473297	1.54689	0.12189	0.294541	N	NA
PHF23	NM_001284518	600	682	817	885	10	7	14	19	12.7056	-1.05342	0.630208	-1.66587	0.0957396	0.251691	N	NA
UBBP4	NR_144546	655	730	863	938	44	40	25	23	32.072	0.508003	0.431401	1.17696	0.239213	0.443713	N	NA
UBBP4	NR_144546	704	757	1116	1166	33	15	9	24	19.3883	0.257923	0.566526	0.454945	0.649149	0.792455	N	NA
TAF15	NM_003487	1285	1368	1485	1596	8	4	30	41	21.7932	-2.52249	0.565776	-4.3607	1.29647845101518e-05	0.000387625	Y	arsenite
TAF15	NM_003487	1549	1632	1760	1822	6	6	32	20	17.0798	-2.09403	0.608249	-3.39016	0.000698516	0.00826968	Y	arsenite
TAF15	NM_139215	1361	1424	1545	1649	4	2	31	36	19.4753	-3.20117	0.631976	-4.77065	1.83633217178516e-06	7.97856863783824e-05	Y	arsenite
RPL23	NM_000978	229	306	442	501	17	20	8	7	12.5075	0.896095	0.636406	1.40294	0.160634	0.345185	N	NA
RPL19	NM_000981	103	188	295	374	23	27	0	8	13.3951	1.22439	0.923796	1.35098	0.176703	0.367711	N	NA
STAT5A	NM_001288718	893	960	1194	1286	21	15	5	21	14.874	0.207597	0.623129	0.332871	0.739231	0.857333	N	NA
STAT5A	NM_001288718	4015	4101	4218	4286	23	19	7	6	13.0226	1.22465	0.634027	1.91799	0.0551123	0.17871	N	NA
STAT5A	NM_003152	780	860	1014	1070	33	20	4	13	16.3276	1.22235	0.605011	2.00805	0.0446375	0.153192	N	NA
STAT5A	NM_003152	3915	4001	4118	4186	24	17	5	7	12.4388	1.29059	0.647356	1.9766	0.0480867	0.160958	N	NA
STAT5A	NM_001288720	690	751	922	990	25	13	3	14	12.9058	0.781002	0.662075	1.1755	0.239795	0.444115	N	NA
STAT5A	NM_001288720	3735	3825	3936	4004	22	17	5	6	11.7528	1.32376	0.659784	1.98743	0.0468752	0.157801	N	NA
STAT5A	NM_001288719	3738	3828	3939	4007	22	17	5	6	11.7528	1.32376	0.659784	1.98743	0.0468752	0.157801	N	NA
CAVIN1	NM_012232	142	209	414	488	68	49	17	8	33.2561	1.80022	0.472378	3.78495	0.000153737	0.00258278	Y	control
CAVIN1	NM_012232	814	904	1056	1134	34	40	5	15	22.0786	1.49509	0.543881	2.72976	0.00633795	0.0399291	Y	control
CAVIN1	NM_012232	1149	1204	1302	1384	27	26	4	2	13.658	2.38313	0.677656	3.38186	0.000719973	0.00846689	Y	control
UBTF	NM_001076684	2207	2287	2419	2481	18	20	15	15	16.7863	0.0717417	0.558982	0.128349	0.897873	0.945119	N	NA
UBTF	NM_001076684	1363	1432	1581	1659	24	15	11	13	15.2298	0.382058	0.585358	0.652172	0.51429	0.685986	N	NA
HEXIM1	NM_006460	1927	2009	2249	2319	11	15	37	31	24.5362	-1.51727	0.504742	-2.99335	0.00275934	0.0213486	Y	arsenite
IGF2BP1	NM_001160423	1686	1758	2483	2543	15	13	16	10	13.5002	-0.152972	0.61478	-0.248899	0.803439	0.89556	N	NA
LRRC59	NM_018509	723	806	952	1006	76	49	12	28	38.615	1.30983	0.434457	3.00574	0.00264939	0.0207713	Y	control
LRRC59	NM_018509	419	504	672	741	33	27	13	12	20.3419	0.903669	0.527439	1.7091	0.0874319	0.238009	N	NA
LRRC59	NM_018509	66	147	254	327	15	20	10	9	13.1638	0.541116	0.620895	0.870467	0.384045	0.580511	N	NA
SRSF1	NM_006924	299	384	486	561	22	15	21	16	18.4605	-0.254383	0.545268	-0.466559	0.640816	0.788175	N	NA
SRSF1	NR_034041	686	762	962	1038	46	38	26	25	32.8285	0.425251	0.426223	0.997337	0.318601	0.528273	N	NA
SRSF1	NR_034041	280	355	492	572	24	13	20	26	20.6693	-0.531248	0.524003	-1.01334	0.310897	0.52315	N	NA
SRSF1	NM_001078166	687	762	962	1038	46	38	26	24	32.5744	0.450734	0.428576	1.05126	0.293138	0.506535	N	NA
SRSF1	NM_001078166	280	355	497	572	20	9	18	20	16.7535	-0.595357	0.573386	-1.03756	0.299475	0.513385	N	NA
H3F3B	NM_005324	161	265	346	435	19	20	11	20	17.1124	0.0783719	0.560098	0.139896	0.888742	0.942152	N	NA
H3F3B	NM_005324	158	236	456	512	19	12	15	11	14.0914	-0.026766	0.60476	-0.0442645	0.964694	0.976726	N	NA
H3F3B	NM_005324	372	443	560	647	12	14	11	15	12.9091	-0.21832	0.617459	-0.353581	0.723653	0.84644	N	NA
UNC13D	NM_199242	3950	4021	4187	4263	26	24	14	19	20.1879	0.313561	0.519889	0.602858	0.546603	0.713122	N	NA
UBALD2	NM_182565	624	690	841	904	11	10	21	15	14.6463	-0.928107	0.600957	-1.54149	0.123196	0.296219	N	NA
SRSF2	NR_036608	444	510	676	754	35	35	16	7	22.2684	1.19851	0.535218	2.2311	0.0256747	0.104596	N	NA
SRSF2	NR_036608	1055	1127	1625	1684	13	7	19	15	13.7876	-0.91575	0.617228	-1.48052	0.138734	0.316593	N	NA
LINC02080	NR_110837	2572	2645	2805	2846	25	17	20	11	18.0218	0.1314	0.561682	0.233961	0.815015	0.89767	N	NA
LINC02080	NR_110837	2572	2669	2868	2943	13	22	11	7	12.9874	0.599326	0.63744	0.939073	0.347693	0.553548	N	NA
SRSF2	NM_001195427	446	515	680	759	39	42	18	9	25.8785	1.20028	0.502374	2.38151	0.017242	0.0794121	N	NA
SRSF2	NM_001195427	950	1023	1521	1581	14	7	21	18	15.3459	-1.03728	0.596033	-1.73569	0.0826186	0.22879	N	NA
SRSF2	NM_003016	840	925	1920	1979	65	53	12	21	35.408	1.48998	0.435603	3.40552	0.000660392	0.00797899	Y	control
SRSF2	NM_003016	444	510	678	757	34	35	16	8	22.3065	1.13059	0.528887	2.13072	0.033112	0.123354	N	NA
SRSF2	NM_003016	1949	2018	2516	2576	13	7	15	15	12.6274	-0.745768	0.630609	-1.18089	0.237648	0.443609	N	NA
TMC6	NM_007267	1589	1691	1875	1903	30	29	9	12	19.0074	1.1144	0.545608	2.03397	0.0419548	0.146551	N	NA
TMC6	NM_007267	618	697	921	998	22	22	8	12	15.3315	0.784595	0.586748	1.33374	0.18229	0.374342	N	NA
TMC6	NM_007267	152	236	300	417	22	14	7	11	12.8926	0.640356	0.627098	1.01888	0.308261	0.521355	N	NA
TMC6	NM_001321185	645	725	931	988	27	36	14	20	23.5	0.593006	0.499446	1.18614	0.235566	0.441124	N	NA
TMC6	NM_001321185	1614	1722	1924	1952	33	32	8	14	20.584	1.19216	0.534022	2.22228	0.0262644	0.106744	N	NA
TMC6	NM_001321185	196	291	382	479	34	24	9	15	19.4493	0.918445	0.541869	1.69008	0.0910124	0.243291	N	NA
TMC6	NM_001127198	120	209	303	420	33	36	8	17	22.2935	1.11624	0.522019	2.13042	0.0331373	0.123354	N	NA
TMC6	NM_001127198	1683	1791	1971	1999	29	29	6	11	17.6672	1.35765	0.572056	2.3568	0.0184332	0.0829493	N	NA
TMC6	NM_001127198	716	793	1016	1083	21	21	8	11	14.6246	0.784657	0.596391	1.31218	0.189461	0.380648	N	NA
CBX4	NM_003655	901	983	1248	1308	16	9	27	23	19.2622	-1.15636	0.547368	-2.10673	0.0351413	0.128609	N	NA
CBX4	NM_003655	697	770	874	950	7	7	18	27	15.2503	-1.69336	0.607035	-2.76311	0.00572536	0.0368773	Y	arsenite
SLC38A10	NM_001037984	1727	1817	1976	2053	10	11	17	25	16.0475	-1.11034	0.57976	-1.90946	0.0562027	0.180586	N	NA
ACTG1	NM_001199954	978	1058	1195	1264	25	19	4	6	12.5844	1.5951	0.654874	2.40196	0.0163076	0.0765072	N	NA
ACTG1	NM_001614	1414	1496	1638	1718	22	22	7	11	14.7874	0.914759	0.597861	1.52456	0.127369	0.301988	N	NA
ACTG1	NR_037688	883	945	1080	1152	30	18	3	8	13.6456	1.59821	0.647907	2.43467	0.0149054	0.0728339	N	NA
ACTG1	NR_037688	208	287	370	482	23	23	5	4	12.8817	1.76887	0.656721	2.64702	0.00812034	0.0474314	Y	control
HGS	NM_004712	1596	1692	1893	1999	15	21	9	23	16.6674	-0.0500624	0.58326	-0.0858175	0.931611	0.961459	N	NA
P4HB	NM_000918	200	283	430	511	45	46	13	12	27.4338	1.4824	0.480573	3.06803	0.00215473	0.018014	Y	control
P4HB	NM_000918	1612	1684	1845	1922	28	37	23	19	26.3092	0.341059	0.476897	0.715019	0.474598	0.653034	N	NA
P4HB	NM_000918	1372	1432	1599	1672	33	33	22	14	24.8815	0.55196	0.49121	1.12297	0.261451	0.468223	N	NA
P4HB	NM_000918	1069	1138	1304	1383	20	25	8	13	15.8641	0.759275	0.583354	1.29853	0.194104	0.384719	N	NA
P4HB	NM_000918	519	602	708	790	28	10	13	10	14.7275	0.373419	0.617869	0.603956	0.545873	0.713122	N	NA
MAFG	NM_032711	370	469	572	665	11	5	31	20	17.6328	-1.73399	0.593482	-2.89656	0.00377273	0.0264091	Y	arsenite
MAFG	NM_032711	1015	1074	1251	1350	11	6	17	16	12.7928	-1.06679	0.63287	-1.6799	0.0929774	0.245856	N	NA
MAFG	NM_002359	252	355	453	572	11	6	30	18	17.0715	-1.57857	0.595274	-2.63378	0.00844405	0.0486775	Y	arsenite
DUS1L	NM_022156	710	795	923	1016	17	28	16	11	17.7389	0.423962	0.568317	0.74572	0.455837	0.639227	N	NA
DUS1L	NM_022156	997	1080	1231	1315	17	21	17	17	17.8954	-0.0888781	0.546832	-0.162557	0.870867	0.931575	N	NA
DUS1L	NM_022156	54	147	302	396	13	18	9	12	12.7302	0.273358	0.625274	0.436992	0.662117	0.802913	N	NA
FASN	NM_004104	3357	3444	3645	3732	53	58	30	44	45.0646	0.321087	0.374944	0.856176	0.3919	0.586354	N	NA
FASN	NM_004104	4180	4263	4359	4439	50	38	22	20	31.2619	0.746104	0.441152	1.68937	0.0911492	0.243291	N	NA
FASN	NM_004104	6890	6942	7237	7304	44	26	19	17	25.4916	0.628745	0.486605	1.29081	0.196768	0.387387	N	NA
FASN	NM_004104	5817	5887	6081	6164	26	32	17	28	25.2393	0.114099	0.482076	0.236654	0.812925	0.89767	N	NA
FASN	NM_004104	6379	6478	6570	6690	36	19	26	13	23.1198	0.176948	0.527583	0.3354	0.737323	0.857333	N	NA
FASN	NM_004104	2722	2791	2937	2999	25	19	7	16	15.9951	0.611284	0.584849	1.04331	0.296805	0.509799	N	NA
FASN	NM_004104	5017	5079	5214	5302	20	21	11	14	16.0409	0.409734	0.570353	0.71784	0.472856	0.65218	N	NA
FASN	NM_004104	515	608	778	881	23	22	6	12	14.9674	0.946928	0.599601	1.57311	0.115693	0.285429	N	NA
FASN	NM_004104	5426	5487	5633	5732	22	21	9	8	14.3685	0.940433	0.604001	1.55137	0.120813	0.293129	N	NA
FASN	NM_004104	3011	3089	3300	3384	19	15	10	8	12.5895	0.556093	0.628611	0.883399	0.377021	0.573331	N	NA
FASN	NM_004104	2063	2142	2262	2327	16	18	8	9	12.326	0.64196	0.632795	1.01245	0.311321	0.52315	N	NA
SMCHD1	NM_015295	16	69	189	265	22	16	17	22	19.0615	-0.272779	0.531915	-0.512769	0.608113	0.764879	N	NA
TYK2	NM_003331	2132	2221	2348	2429	22	15	14	14	15.922	0.115622	0.572123	0.202066	0.839865	0.908352	N	NA
ZNF787	NM_001002836	936	993	1142	1220	11	14	6	21	12.7672	-0.283053	0.648771	-0.436111	0.662756	0.802954	N	NA
CSNK1G2	NM_001319	230	299	460	549	35	38	14	33	29.0044	0.372118	0.469446	0.792268	0.428204	0.619027	N	NA
CSNK1G2	NM_001319	2036	2091	2289	2357	12	12	16	11	12.8695	-0.387597	0.623778	-0.621414	0.534328	0.704977	N	NA
DOT1L	NM_032482	4144	4239	4373	4467	19	7	14	16	13.8874	-0.424424	0.619417	-0.684852	0.493437	0.665845	N	NA
DOT1L	NM_032482	1174	1292	1439	1520	15	16	9	12	12.6885	0.268503	0.621543	0.43178	0.665901	0.805106	N	NA
ZBTB7A	NM_001317990	784	870	1048	1125	15	11	13	17	13.9348	-0.412245	0.600418	-0.686359	0.492487	0.665845	N	NA
KHSRP	NM_003685	1247	1373	1458	1534	39	45	19	19	29.4197	0.82774	0.453808	1.82138	0.0685498	0.20323	N	NA
KHSRP	NM_003685	54	127	263	369	50	10	26	33	29.0933	-0.212252	0.763467	-0.277948	0.781052	0.881495	N	NA
KHSRP	NM_003685	1791	1923	1998	2080	38	37	13	20	25.8227	0.864972	0.478879	1.80277	0.0714239	0.208942	N	NA
KHSRP	NM_003685	645	728	944	1017	17	17	8	13	13.3214	0.389813	0.613478	0.634808	0.525554	0.698496	N	NA
HNRNPM	NM_005968	478	558	675	779	15	23	17	12	16.6668	0.111751	0.575244	0.194308	0.845935	0.913796	N	NA
HNRNPM	NM_005968	1467	1534	1689	1773	22	12	8	10	12.455	0.557524	0.635409	0.875892	0.381089	0.578023	N	NA
HNRNPM	NM_001297418	1425	1506	1657	1739	30	14	12	14	16.833	0.429711	0.575022	0.746622	0.455292	0.639227	N	NA
HNRNPM	NM_001297418	516	596	713	801	13	22	18	13	16.5421	-0.0775044	0.579127	-0.133879	0.893499	0.944923	N	NA
HNRNPM	NM_001297418	1716	1765	1858	1941	16	14	10	14	13.229	0.0574513	0.610692	0.0940603	0.925061	0.959323	N	NA
SMARCA4	NM_001128844	137	253	332	380	28	19	9	11	15.9529	0.857837	0.58081	1.47265	0.140846	0.319348	N	NA
TRIR	NR_138095	388	464	600	661	79	74	33	36	53.3076	0.853979	0.34777	2.4534	0.0141512	0.070516	N	NA
TRIR	NR_138095	303	464	600	662	35	20	15	19	21.4745	0.387942	0.516739	0.750276	0.453089	0.638377	N	NA
PKN1	NM_002741	921	988	1212	1279	14	19	17	12	15.5035	-0.072165	0.58621	-0.123146	0.901991	0.94822	N	NA
PKN1	NM_002741	514	601	739	830	13	18	10	14	13.5284	0.108282	0.61115	0.17716	0.859383	0.924361	N	NA
PKN1	NM_002741	377	448	564	639	14	17	13	9	13.1074	0.195392	0.621072	0.314621	0.753049	0.867088	N	NA
PKN1	NM_002741	231	304	913	988	15	12	13	11	12.6473	-0.0906553	0.622329	-0.145693	0.884164	0.939557	N	NA
GATAD2A	NM_017660	448	545	682	751	11	18	11	18	14.4027	-0.207882	0.604001	-0.344186	0.730706	0.850991	N	NA
GATAD2A	NM_001300946	142	255	376	448	13	15	12	16	13.9061	-0.22117	0.600571	-0.368272	0.71267	0.836984	N	NA
LOC102724908	NR_135636	915	1005	1059	1163	55	43	47	62	51.4478	-0.398329	0.3503	-1.13701	0.255533	0.462793	N	NA
LOC102724908	NR_135636	170	252	354	419	51	41	46	53	47.5336	-0.355333	0.360366	-0.985985	0.324141	0.533381	N	NA
LOC102724908	NR_135636	627	699	1481	1556	23	27	42	38	33.1989	-0.88807	0.4308	-2.05991	0.0394075	0.141004	N	NA
LOC102724908	NR_135636	1520	1570	1663	1797	39	22	29	40	32.2081	-0.417094	0.439428	-0.948981	0.34263	0.547464	N	NA
LOC102724908	NR_135636	3970	4050	4141	4233	23	19	13	26	19.844	-0.126627	0.532264	-0.237863	0.811988	0.89767	N	NA
LOC102724908	NR_135636	2618	2687	2894	2967	25	13	14	22	18.1288	-0.167396	0.554363	-0.301898	0.76273	0.871564	N	NA
LOC102724908	NR_135636	3373	3423	3575	3656	21	12	21	20	18.5502	-0.534096	0.54512	-0.979358	0.327403	0.534264	N	NA
ZC3H4	NM_015168	529	587	770	879	17	11	6	16	12.0824	0.0886351	0.648369	0.136619	0.891332	0.943764	N	NA
SAE1	NR_027280	76	172	256	306	23	29	23	18	23.0805	0.0707934	0.500461	0.141474	0.887495	0.941396	N	NA
LINC01002	NR_028324	2091	2181	2618	2682	61	43	33	46	44.6182	0.129322	0.376631	0.343329	0.731351	0.850991	N	NA
LINC01002	NR_028324	1684	1744	2083	2146	65	37	41	32	42.8247	0.187201	0.39978	0.46823	0.63962	0.788175	N	NA
LINC01002	NR_028324	1178	1250	3725	3826	22	32	47	46	37.6498	-0.986025	0.415101	-2.37336	0.0176272	0.0803473	N	NA
LINC01002	NR_028324	1679	1792	2618	2664	29	17	11	13	16.7834	0.59634	0.569116	1.0463	0.295421	0.508689	N	NA
LINC01002	NR_028324	2220	2279	2618	2682	23	20	9	12	15.3638	0.688269	0.583243	1.17769	0.238919	0.443713	N	NA
CDC34	NM_004359	8	79	196	290	15	14	13	18	14.8994	-0.311553	0.584316	-0.533121	0.59395	0.757582	N	NA
POLRMT	NM_005035	166	273	382	452	19	32	11	21	20.2086	0.399335	0.543456	0.734345	0.462738	0.646206	N	NA
POLRMT	NM_005035	2875	2972	3189	3267	15	18	11	18	15.2667	-0.051062	0.583636	-0.0874845	0.930286	0.961369	N	NA
PLPPR3	NM_001270366	1096	1174	1359	1421	11	24	9	13	13.9733	0.379046	0.623609	0.607456	0.543548	0.71129	N	NA
PTBP1	NM_031990	2106	2168	2276	2366	16	21	12	6	13.4345	0.660505	0.630161	1.04665	0.295262	0.508689	N	NA
R3HDM4	NM_138774	140	229	435	529	20	20	19	10	17.1082	0.161232	0.571271	0.282279	0.777729	0.879432	N	NA
ARID3A	NM_005224	335	421	525	617	17	14	10	19	14.7153	-0.134105	0.593124	-0.226054	0.821159	0.89767	N	NA
TMEM259	NM_033420	2088	2169	2338	2420	35	42	34	32	35.4987	-0.0369577	0.414552	-0.0891582	0.928956	0.961102	N	NA
TMEM259	NM_033420	1790	1889	2056	2149	26	42	20	33	29.7481	0.115334	0.463895	0.248603	0.803668	0.89556	N	NA
TMEM259	NM_033420	1756	1823	2441	2529	27	19	13	18	18.6755	0.27856	0.538949	0.516615	0.605425	0.764236	N	NA
TMEM259	NM_033420	29	117	298	375	27	21	13	15	18.387	0.463826	0.541258	0.856213	0.39188	0.586354	N	NA
TMEM259	NM_001033026	1893	1993	2169	2249	18	35	19	31	25.5641	-0.136029	0.499892	-0.272134	0.785519	0.883709	N	NA
TMEM259	NM_001033026	2211	2285	2426	2509	22	28	19	19	21.7215	0.126645	0.508188	0.249211	0.803198	0.89556	N	NA
TMEM259	NM_001033026	28	115	297	376	24	24	12	15	18.1595	0.518276	0.544149	0.951483	0.341359	0.547203	N	NA
TMEM259	NM_001033026	1863	1925	2556	2648	19	15	10	13	13.8598	0.266297	0.601425	0.442544	0.658096	0.799847	N	NA
CIRBP	NM_001300829	548	654	1029	1062	23	14	7	18	14.887	0.279272	0.60565	0.460711	0.645006	0.790585	N	NA
CIRBP	NM_001300815	717	788	996	1116	16	12	8	14	12.1752	0.0818971	0.633565	0.129216	0.897187	0.945119	N	NA
ATP5F1D	NM_001687	540	612	908	984	31	35	14	9	21.3325	1.1352	0.531174	2.12957	0.0332074	0.123354	N	NA
ATP5F1D	NM_001687	472	612	908	985	16	15	9	10	12.1596	0.384516	0.631039	0.60883	0.542637	0.710625	N	NA
CIRBP	NR_023313	441	545	920	953	21	15	7	18	14.6919	0.247995	0.604976	0.409611	0.682091	0.817953	N	NA
CIRBP	NR_023312	607	713	1088	1121	23	15	7	18	15.1239	0.315083	0.600937	0.523834	0.600394	0.762488	N	NA
STK11	NM_000455	232	333	495	576	27	24	25	33	27.1512	-0.413702	0.459218	-0.900748	0.367722	0.567221	N	NA
STK11	NM_000455	566	655	799	883	21	23	29	27	25.2542	-0.568472	0.476889	-1.19175	0.233361	0.438053	N	NA
STK11	NM_000455	228	314	850	941	13	13	13	20	14.7387	-0.525362	0.589939	-0.890059	0.373434	0.571206	N	NA
STK11	NM_000455	4	79	222	320	8	13	8	22	12.7166	-0.629298	0.648052	-0.970116	0.331989	0.537992	N	NA
RPS15	NM_001308226	186	255	347	452	23	28	5	8	15.0821	1.50525	0.612952	2.43095	0.0150594	0.0731814	N	NA
RPS15	NM_001308226	281	379	456	530	24	21	3	3	11.7899	2.16752	0.695641	3.01103	0.0026036	0.0205953	Y	control
RPS15	NM_001018	186	271	337	431	32	24	7	5	15.8966	1.69987	0.608262	2.75936	0.00579152	0.03715	Y	control
RPS15	NM_001018	97	151	302	373	21	26	6	6	13.9584	1.48023	0.62861	2.33072	0.0197684	0.0871785	N	NA
TCF3	NM_003200	149	215	368	441	18	17	7	10	12.4851	0.681253	0.630107	1.07858	0.280774	0.491417	N	NA
TCF3	NM_003200	1945	2038	2372	2449	15	12	12	13	12.8654	-0.135486	0.616169	-0.219892	0.825955	0.899374	N	NA
TCF3	NM_001136139	116	185	338	411	21	14	8	9	12.4586	0.66723	0.632316	1.05283	0.292418	0.506535	N	NA
MBD3	NM_001281454	505	581	737	844	57	59	67	58	60.454	-0.363459	0.330657	-1.09922	0.271674	0.479646	N	NA
MBD3	NM_001281454	789	862	1108	1182	24	38	19	32	27.8247	0.0427282	0.474861	0.0899774	0.928305	0.960992	N	NA
MBD3	NM_001281453	610	683	829	940	53	53	60	51	54.3602	-0.323728	0.345856	-0.936045	0.34925	0.55494	N	NA
MBD3	NM_001281453	59	145	241	333	21	27	25	15	21.9927	-0.0101622	0.520309	-0.0195363	0.984413	0.99059	N	NA
MBD3	NM_001281453	913	985	1150	1230	9	19	11	21	14.9697	-0.366459	0.609418	-0.601268	0.547662	0.713122	N	NA
SF3A2	NM_007165	169	251	445	502	21	21	9	12	15.1687	0.660355	0.58588	1.12502	0.260582	0.467141	N	NA
LMNB2	NM_032737	719	802	977	1046	21	29	18	33	25.0091	-0.244775	0.491027	-0.498473	0.618151	0.773895	N	NA
LMNB2	NM_032737	311	413	607	700	23	25	27	20	23.8014	-0.222763	0.493044	-0.451885	0.651352	0.794595	N	NA
LMNB2	NM_032737	154	223	343	418	28	29	16	18	22.1301	0.447398	0.501909	0.890839	0.373015	0.571192	N	NA
LMNB2	NM_032737	1039	1107	1204	1308	24	31	14	17	20.9056	0.526001	0.519488	1.01167	0.311695	0.52315	N	NA
LMNB2	NM_032737	1456	1554	1709	1796	18	11	14	12	13.6025	-0.107199	0.60995	-0.175762	0.860481	0.924414	N	NA
AES	NM_001130	750	815	944	1029	29	35	29	18	27.5378	0.159006	0.475415	0.334491	0.738009	0.857333	N	NA
AES	NM_001130	569	663	750	820	10	12	15	14	12.9096	-0.575379	0.620272	-0.927181	0.353833	0.557286	N	NA
AES	NM_198970	762	811	949	1038	12	20	11	9	12.8058	0.363644	0.632297	0.574894	0.565363	0.728769	N	NA
AES	NM_198969	821	880	1010	1090	20	27	20	15	20.3265	0.145378	0.529163	0.274758	0.783503	0.882003	N	NA
DAPK3	NM_001348	35	102	203	332	10	10	24	14	15.0464	-1.06051	0.605219	-1.74791	0.0804802	0.224631	N	NA
EEF2	NM_001961	1717	1784	1911	2014	226	254	88	108	161.935	1.023	0.22259	4.594	4.34837208034236e-06	0.000159803	Y	control
EEF2	NM_001961	615	686	846	924	186	197	87	100	137.473	0.764351	0.231596	3.29945	0.000968757	0.0106142	Y	control
EEF2	NM_001961	2392	2470	2636	2709	104	106	33	60	72.3837	0.901338	0.318901	2.82423	0.00473949	0.0316684	Y	control
EEF2	NM_001961	782	847	1143	1190	42	41	33	25	34.7054	0.230758	0.421631	0.547269	0.584194	0.747836	N	NA
EEF2	NM_001961	2757	2820	2985	3061	34	49	11	20	27.2208	1.09405	0.488033	2.23541	0.0253907	0.103919	N	NA
EEF2	NM_001961	797	864	1858	1935	24	23	14	14	18.2487	0.436871	0.542232	0.805142	0.420738	0.612933	N	NA
CHAF1A	NM_005483	996	1064	1244	1323	31	35	17	26	26.5216	0.344809	0.469677	0.733849	0.463041	0.646206	N	NA
CHAF1A	NM_005483	1169	1244	1445	1530	28	19	12	13	17.3312	0.575304	0.557932	1.02981	0.303098	0.516964	N	NA
CHAF1A	NM_005483	1690	1745	1913	1980	16	15	14	9	13.3557	0.132545	0.616195	0.21513	0.829666	0.900634	N	NA
CHAF1A	NM_005483	950	1024	1155	1223	18	14	10	11	12.8988	0.297417	0.617585	0.481311	0.630296	0.781576	N	NA
HDGFL2	NM_001348169	1182	1247	1486	1567	13	22	15	22	17.9585	-0.287182	0.557416	-0.515218	0.6064	0.764611	N	NA
HDGFL2	NM_001348169	2151	2219	2413	2535	14	14	17	16	15.3355	-0.447481	0.57912	-0.772564	0.43978	0.627735	N	NA
LONP1	NM_004793	198	296	457	539	23	29	43	41	34.7248	-0.899937	0.423501	-2.12343	0.0337181	0.124536	N	NA
LONP1	NM_004793	725	788	924	1005	29	27	27	36	29.636	-0.399968	0.442648	-0.903469	0.366277	0.567221	N	NA
LONP1	NM_004793	2728	2807	2967	3041	20	20	28	23	23.0214	-0.572343	0.497339	-1.15051	0.249935	0.458301	N	NA
LONP1	NM_004793	2186	2268	2369	2461	15	13	13	20	15.1707	-0.435213	0.582683	-0.746633	0.455285	0.639227	N	NA
LONP1	NM_004793	1538	1607	1730	1852	11	8	16	20	13.9926	-1.03847	0.607193	-1.70522	0.0881526	0.238865	N	NA
LONP1	NM_004793	2441	2544	2675	2752	13	8	20	13	13.8064	-0.819961	0.618372	-1.32405	0.185486	0.37705	N	NA
LONP1	NR_076392	2404	2490	2651	2729	16	13	18	17	16.0747	-0.48425	0.569136	-0.850609	0.394987	0.58651	N	NA
LONP1	NM_001276480	2422	2501	2652	2732	17	16	24	28	21.5362	-0.840492	0.508716	-1.65036	0.0988692	0.256404	N	NA
LONP1	NM_001276480	1213	1285	1413	1531	11	9	15	24	14.9557	-1.07199	0.595581	-1.79445	0.0727413	0.211742	N	NA
LONP1	NM_001276480	1911	1978	2169	2228	15	13	14	16	14.4445	-0.320516	0.590205	-0.543009	0.587124	0.750497	N	NA
LONP1	NM_001276479	2421	2507	2668	2746	16	13	18	17	16.0747	-0.48425	0.569136	-0.850609	0.394987	0.58651	N	NA
GTF2F1	NM_002096	1133	1224	1330	1398	21	14	12	12	14.381	0.239284	0.595584	0.401617	0.687966	0.821268	N	NA
DNMT1	NM_001130823	583	682	730	828	19	6	24	8	14.5186	-0.581721	0.654798	-0.888034	0.374522	0.571206	N	NA
DNMT1	NM_001318731	462	561	609	707	19	6	24	8	14.5186	-0.581721	0.654798	-0.888034	0.374522	0.571206	N	NA
ICAM5	NM_003259	2181	2272	2460	2572	12	11	13	23	14.8112	-0.788182	0.594929	-1.32287	0.185879	0.37705	N	NA
ICAM5	NM_003259	1305	1384	1612	1681	12	13	11	15	12.6723	-0.268611	0.620896	-0.432594	0.66531	0.804943	N	NA
CDC37	NM_007065	853	940	1110	1212	36	39	11	8	22.2356	1.55623	0.530072	2.9145	0.00356253	0.0256502	Y	control
CDC37	NM_007065	217	323	403	472	18	25	8	14	15.6861	0.644443	0.58806	1.09396	0.273974	0.481845	N	NA
CDC37	NM_007065	313	425	1321	1370	22	12	9	13	13.5072	0.315427	0.615796	0.511813	0.608782	0.764879	N	NA
CDC37	NM_007065	1248	1314	1492	1572	13	14	12	12	12.653	-0.080166	0.620673	-0.12918	0.897215	0.945119	N	NA
JUNB	NM_002229	609	678	792	900	6	11	21	47	21.933	-1.99215	0.562267	-3.50749	0.000452351	0.00633337	Y	arsenite
JUNB	NM_002229	40	122	330	387	12	13	24	34	21.27	-1.33537	0.523446	-2.54185	0.0110268	0.0600346	N	NA
JUNB	NM_002229	972	1062	1146	1254	8	9	18	32	17.2103	-1.59567	0.581999	-2.7222	0.00648484	0.0401377	Y	arsenite
CALR	NM_004343	1207	1282	1560	1625	48	51	19	34	36.5956	0.621384	0.41733	1.48779	0.136807	0.313381	N	NA
CALR	NM_004343	677	751	892	959	55	62	9	10	31.7149	2.19108	0.479399	4.51187	6.42581714892945e-06	0.000217983	Y	control
CALR	NM_004343	1107	1171	1296	1401	55	53	13	9	30.4894	1.87742	0.476466	3.90634	9.37043969443618e-05	0.00179668	Y	control
LYL1	NM_005583	1273	1357	1475	1573	41	47	12	11	26.2626	1.54418	0.493557	3.10941	0.00187464	0.0161497	Y	control
LYL1	NM_005583	1367	1440	1538	1615	21	21	8	14	15.3868	0.607867	0.585561	1.03633	0.300049	0.51387	N	NA
LYL1	NM_005583	537	623	776	835	22	21	6	13	14.7686	0.821803	0.602071	1.36078	0.173584	0.36489	N	NA
IER2	NM_004907	786	873	1142	1236	42	37	116	104	77.9027	-1.69828	0.309125	-5.48367	4.16595311855403e-08	2.93949652045172e-06	Y	arsenite
IER2	NM_004907	516	597	703	770	34	32	67	88	56.7132	-1.43381	0.345092	-4.14796	3.3545053455713e-05	0.000778598	Y	arsenite
IER2	NM_004907	1463	1529	1796	1866	15	16	40	66	35.3992	-1.8943	0.443694	-4.24562	2.17984951123723e-05	0.000571669	Y	arsenite
IER2	NM_004907	219	306	571	641	13	11	51	53	33.6708	-2.22418	0.456399	-4.82723	1.38448540304318e-06	6.60062770531936e-05	Y	arsenite
IER2	NM_004907	514	660	1546	1643	3	6	22	21	13.7854	-2.13411	0.652751	-3.20347	0.00135783	0.0131181	Y	arsenite
SAMD1	NM_138352	586	644	985	1112	45	60	20	23	35.5746	0.977487	0.426895	2.28592	0.0222587	0.0950709	N	NA
SAMD1	NM_138352	902	984	1067	1154	43	34	14	12	24.4498	1.19139	0.497188	2.38749	0.0169639	0.0787484	N	NA
PKN1	NM_213560	244	315	427	505	14	17	13	8	12.8533	0.249762	0.628593	0.397334	0.691121	0.823185	N	NA
PKN1	NM_213560	772	846	1077	1149	11	16	13	11	12.7307	-0.0785894	0.626385	-0.125506	0.900123	0.94682	N	NA
DNAJB1	NM_006145	181	295	365	433	4	4	21	24	13.9998	-2.3344	0.652472	-3.48139	0.000498823	0.00661597	Y	arsenite
DNAJB1	NM_001300914	1141	1205	1324	1400	5	2	19	25	13.4161	-2.43851	0.672547	-3.50747	0.000452383	0.00633337	Y	arsenite
BRD4	NM_058243	3812	3881	4000	4085	19	10	24	16	17.4984	-0.675297	0.569961	-1.18397	0.236425	0.442262	N	NA
AKAP8L	NM_001291478	1664	1743	1839	1952	15	12	11	15	13.0834	-0.178755	0.613134	-0.291518	0.770655	0.874755	N	NA
TPM4	NM_003290	179	256	337	474	21	14	16	6	14.0168	0.318159	0.628799	0.505934	0.612903	0.769509	N	NA
RPL18A	NM_000980	219	288	400	453	31	38	7	12	20.7748	1.46055	0.543081	2.67071	0.00756904	0.0452603	Y	control
RPL18A	NM_000980	79	143	282	364	23	26	12	15	18.4172	0.548121	0.543113	1.00813	0.313391	0.52471	N	NA
JUND	NM_001286968	545	623	885	969	95	84	96	106	95.1891	-0.428706	0.264627	-1.61998	0.105236	0.266337	N	NA
JUND	NM_001286968	156	244	432	515	63	63	97	115	85.8802	-0.985107	0.280999	-3.50428	0.000457844	0.00634909	Y	arsenite
JUND	NM_001286968	36	135	247	314	19	29	25	44	29.4021	-0.706949	0.466427	-1.5149	0.129797	0.30447	N	NA
JUND	NM_001286968	1193	1275	1436	1507	20	17	23	24	21.1147	-0.560461	0.510223	-1.09806	0.27218	0.479646	N	NA
JUND	NM_005354	182	270	536	604	87	91	128	154	116.595	-0.903932	0.24648	-3.66648	0.000245911	0.00377207	Y	arsenite
JUND	NM_005354	622	694	895	972	49	40	51	73	53.3962	-0.707708	0.348034	-2.03279	0.0420739	0.146677	N	NA
JUND	NM_005354	50	154	256	317	23	34	34	48	35.077	-0.724878	0.426912	-1.69723	0.0896523	0.241814	N	NA
JUND	NM_005354	1191	1273	1439	1512	18	18	26	25	22.0438	-0.705814	0.503879	-1.39989	0.161546	0.345833	N	NA
FKBP8	NM_012181	34	166	220	264	17	14	13	15	14.5692	-0.103444	0.588077	-0.175905	0.860369	0.924414	N	NA
FKBP8	NM_001308373	34	165	220	265	18	12	11	15	13.7314	-0.0498366	0.604676	-0.0824071	0.934323	0.96214	N	NA
KMT2B	NM_014727	5902	5961	6137	6267	14	9	13	17	13.2451	-0.565779	0.614719	-0.919666	0.357748	0.559456	N	NA
KMT2B	NM_014727	277	361	473	554	11	10	15	14	12.6519	-0.637778	0.623623	-1.02188	0.30684	0.520448	N	NA
TGFB1	NM_000660	199	280	469	550	38	36	12	19	25.0418	0.928093	0.486424	1.90365	0.0569554	0.18174	N	NA
TGFB1	NM_000660	855	933	1056	1149	21	27	9	18	18.1141	0.533082	0.557588	0.954923	0.339617	0.545614	N	NA
RPS19	NM_001321485	396	545	558	615	31	16	13	15	18.0668	0.424749	0.556049	0.763248	0.445316	0.634009	N	NA
RPS19	NM_001321485	401	478	720	781	18	24	12	9	15.3392	0.649937	0.591908	1.09646	0.272878	0.480395	N	NA
RPS19	NM_001022	381	475	605	680	18	19	5	10	12.3787	0.910149	0.64139	1.41299	0.15766	0.342081	N	NA
ERF	NM_006494	2199	2259	2427	2491	10	8	17	18	13.5586	-1.07033	0.614227	-1.737	0.0823865	0.228506	N	NA
TOMM40	NM_001128917	35	96	191	347	41	33	16	22	26.9016	0.65406	0.466507	1.40047	0.161372	0.345833	N	NA
VASP	NM_003370	818	880	994	1108	31	30	14	9	20.1483	1.02492	0.538686	1.89688	0.0578434	0.182827	N	NA
SLC1A5	NM_005628	67	149	247	314	43	35	11	12	23.8164	1.37363	0.504931	2.70614	0.00680709	0.0413746	Y	control
SLC1A5	NM_005628	236	312	640	733	32	38	14	17	24.2915	0.850924	0.491693	1.72736	0.0841034	0.231448	N	NA
SLC1A5	NM_005628	789	862	1018	1115	31	27	15	24	23.5387	0.295513	0.491423	0.601093	0.547778	0.713122	N	NA
SLC1A5	NM_005628	569	649	829	911	31	37	14	13	22.8224	0.983357	0.508196	1.93004	0.0536013	0.175767	N	NA
CCDC9	NM_015603	351	409	516	619	18	13	15	27	18.1772	-0.621609	0.551191	-1.12687	0.259796	0.466857	N	NA
NOP53	NM_015710	429	516	852	948	63	64	20	34	43.2045	0.939734	0.390469	2.40337	0.016245	0.0764163	N	NA
NOP53	NM_015710	995	1040	1166	1266	41	44	21	26	31.9733	0.564675	0.432423	1.30495	0.191911	0.383303	N	NA
NOP53	NM_015710	764	830	959	1034	48	35	15	26	29.6134	0.712487	0.456136	1.56007	0.118744	0.290117	N	NA
RPL18	NM_001270490	424	481	632	699	27	32	7	5	16.7114	1.78226	0.601725	2.92184	0.00347975	0.0251569	Y	control
RPL18	NM_001270490	525	589	684	760	20	14	7	13	12.9688	0.444396	0.624161	0.711038	0.47706	0.655401	N	NA
RPL18	NR_073022	503	561	720	782	28	30	6	3	15.6556	2.07691	0.631938	3.21483	0.00130521	0.012791	Y	control
RPL18	NM_000979	513	571	728	789	21	29	8	4	14.7409	1.54415	0.63009	2.42571	0.0152785	0.0740418	N	NA
RPL18	NM_000979	608	676	770	847	22	14	7	12	13.1467	0.576361	0.623107	0.923235	0.355885	0.559013	N	NA
RPL18	NM_000979	338	404	561	657	30	18	1	2	11.5411	2.86395	0.749726	3.48396	0.000494059	0.00660243	Y	control
PPP1R15A	NM_014330	1566	1631	1934	2002	15	11	59	72	41.2503	-2.44598	0.42739	-5.66382	1.48037391603104e-08	1.30568979393937e-06	Y	arsenite
PPP1R15A	NM_014330	289	366	615	705	11	23	50	64	38.5855	-1.86816	0.438766	-4.23774	2.25783033209783e-05	0.000577219	Y	arsenite
PPP1R15A	NM_014330	1180	1244	1582	1658	11	10	45	67	34.8185	-2.48302	0.464427	-5.27785	1.30710594166092e-07	7.68578293696619e-06	Y	arsenite
PPP1R15A	NM_014330	1039	1134	1218	1324	14	14	44	44	30.2805	-1.78722	0.462383	-3.84379	0.000121147	0.00220314	Y	arsenite
PPP1R15A	NM_014330	827	921	1013	1095	7	6	25	21	15.5195	-1.8321	0.609099	-2.97319	0.00294724	0.0222177	Y	arsenite
RUVBL2	NR_135578	584	670	761	856	24	16	8	9	13.5802	0.8411	0.616364	1.36023	0.173757	0.36489	N	NA
RUVBL2	NM_006666	602	683	766	860	24	15	3	9	11.8932	1.22508	0.668252	1.81822	0.0690298	0.203967	N	NA
FTL	NM_000146	46	132	363	457	28	20	13	13	17.8581	0.55261	0.550543	1.00263	0.316042	0.526946	N	NA
FTL	NM_000146	523	605	735	835	26	16	13	13	16.4787	0.372565	0.569165	0.654158	0.51301	0.685568	N	NA
FTL	NM_000146	247	314	426	513	24	28	7	3	14.6079	1.80225	0.639712	2.77364	0.00554327	0.0359497	Y	control
SNRNP70	NM_003089	1118	1197	1342	1420	77	62	51	60	61.3518	0.0589731	0.322216	0.183019	0.854783	0.920536	N	NA
SNRNP70	NM_003089	1361	1433	1590	1664	41	37	30	41	36.7368	-0.114407	0.403611	-0.283454	0.776829	0.879432	N	NA
SNRNP70	NM_003089	1633	1707	1851	1912	33	28	25	40	31.1729	-0.323349	0.43786	-0.738393	0.460276	0.644386	N	NA
SNRNP70	NM_003089	622	704	808	920	30	31	12	30	24.9243	0.279551	0.498702	0.5603	0.575275	0.7391	N	NA
SNRNP70	NM_001301069	1190	1271	1396	1486	33	36	46	49	41.4452	-0.688515	0.385739	-1.78436	0.0743644	0.21611	N	NA
SNRNP70	NM_001301069	1588	1675	1824	1890	30	29	30	40	32.2121	-0.473327	0.427794	-1.10625	0.268619	0.476226	N	NA
SNRNP70	NM_001301069	1420	1509	1627	1697	18	7	12	16	13.0913	-0.379297	0.630234	-0.601531	0.547486	0.713122	N	NA
RPL13A	NM_012423	326	396	486	567	165	159	43	61	101.267	1.35438	0.271405	4.9841	6.22524182668006e-07	3.32767472189807e-05	Y	control
RPL13A	NM_012423	106	193	313	409	95	93	29	34	59.5951	1.27241	0.337978	3.75794	0.000171315	0.00279815	Y	control
RPL13A	NR_073024	333	412	480	567	155	125	37	54	87.5353	1.32845	0.29076	4.56263	5.05163742991917e-06	0.000178222	Y	control
RPL13A	NR_073024	260	357	473	539	69	70	24	17	42.7627	1.41538	0.402956	3.5018	0.000462128	0.00634909	Y	control
RPL13A	NR_073024	60	118	280	349	19	24	7	11	14.6131	0.8882	0.603457	1.46691	0.142401	0.322046	N	NA
RPL13A	NM_001270491	261	327	411	493	116	98	22	42	65.3173	1.43868	0.339707	4.22575	2.38151143545597e-05	0.000600141	Y	control
RPL13A	NM_001270491	203	295	407	475	57	62	21	16	37.1518	1.33816	0.424657	3.14143	0.00168124	0.0152088	Y	control
SCAF1	NM_021228	2864	2947	3128	3211	14	12	14	17	14.2457	-0.454444	0.594193	-0.764547	0.444541	0.633417	N	NA
SCAF1	NM_021228	1760	1832	1998	2061	12	6	12	24	13.591	-1.08539	0.629601	-1.71772	0.0858479	0.234421	N	NA
ATF5	NM_001290746	871	931	1741	1845	20	16	72	75	48.0473	-2.18827	0.390451	-5.56923	2.55866217057642e-08	2.05158184949855e-06	Y	arsenite
ATF5	NM_001290746	785	844	1028	1104	8	20	46	60	35.0506	-2.01169	0.46564	-4.29278	1.76449018136132e-05	0.000494057	Y	arsenite
ATF5	NM_001290746	1501	1577	1800	1850	3	7	55	39	28.1669	-3.1288	0.558177	-5.40894	6.33982705591437e-08	4.30132881793575e-06	Y	arsenite
ATF5	NM_001290746	612	670	1800	1865	5	2	30	26	16.8607	-2.79361	0.642191	-4.17262	3.01112661023947e-05	0.000717787	Y	arsenite
ATF5	NM_012068	1090	1155	1939	2062	16	14	49	49	33.433	-1.85182	0.445127	-4.13702	3.51845070465849e-05	0.000802158	Y	arsenite
ATF5	NM_012068	1004	1063	1253	1331	7	20	42	49	30.8797	-1.84105	0.489854	-3.7377	0.000185709	0.0029781	Y	arsenite
ATF5	NM_012068	1730	1791	2033	2084	1	7	50	32	24.5062	-2.64584	0.802737	-3.25032	0.00115276	0.0118916	Y	arsenite
ATF5	NM_012068	853	910	2042	2135	6	1	35	34	20.3225	-3.0847	0.62293	-4.71494	2.41781406416152e-06	0.000101548	Y	arsenite
ATF5	NM_012068	425	538	664	769	3	2	29	27	16.3927	-3.12637	0.667677	-4.38071	1.18295863287577e-05	0.000366095	Y	arsenite
ATF5	NM_001193646	795	838	1822	1884	28	23	111	126	75.7021	-2.4	0.324852	-7.34913	1.99500894948597e-13	3.5191957868932595e-11	Y	arsenite
ATF5	NM_001193646	873	929	1072	1156	18	26	63	84	49.6598	-1.89759	0.38428	-4.91864	8.71478756157041e-07	4.52143684076771e-05	Y	arsenite
ATF5	NM_001193646	1535	1612	1829	1879	3	8	66	61	37.1836	-3.45329	0.513288	-6.46906	9.861705872185109e-11	1.15973661056897e-08	Y	arsenite
ATF5	NM_001193646	225	333	459	564	3	3	33	28	18.0438	-3.07081	0.642423	-4.52258	6.10893433003447e-06	0.000211297	Y	arsenite
POLD1	NR_046402	88	197	385	458	21	19	10	7	13.7148	0.836538	0.61566	1.35492	0.175444	0.367557	N	NA
LENG8	NM_052925	1462	1533	1680	1765	57	62	55	68	60.2245	-0.292865	0.326436	-0.897155	0.369636	0.569466	N	NA
LENG8	NM_052925	669	734	1126	1193	30	35	30	37	32.8709	-0.28052	0.42545	-0.659354	0.509668	0.683692	N	NA
LENG8	NM_052925	1969	2075	2216	2264	21	21	23	18	20.7537	-0.216707	0.517553	-0.418778	0.675378	0.812112	N	NA
LENG8	NM_052925	2959	3046	3197	3270	11	18	25	19	18.7174	-0.778177	0.554254	-1.40297	0.160626	0.345185	N	NA
LENG8	NM_052925	396	500	714	785	17	20	15	15	16.5704	0.0382874	0.562589	0.0680615	0.945737	0.970557	N	NA
LENG8	NM_052925	198	278	370	456	15	13	16	16	15.0246	-0.408318	0.582523	-0.700835	0.483406	0.660518	N	NA
LENG8	NM_052925	338	414	1053	1118	18	14	6	14	12.5008	0.373787	0.635679	0.587311	0.556995	0.720865	N	NA
PPP1R12C	NM_001271618	1689	1757	1983	2067	19	22	19	17	19.1443	-0.0692943	0.532839	-0.130069	0.896512	0.945119	N	NA
PPP1R12C	NM_001271618	1584	1668	2523	2623	15	13	14	21	15.7148	-0.513131	0.575128	-0.891752	0.372526	0.571192	N	NA
PPP1R12C	NM_001271618	1988	2051	2214	2284	12	10	20	18	15.3344	-0.939625	0.585771	-1.60092	0.109395	0.274499	N	NA
PPP1R12C	NM_001271618	752	829	1009	1100	12	14	9	17	12.8372	-0.208539	0.62428	-0.334002	0.738378	0.857333	N	NA
PPP1R12C	NM_017607	760	832	1033	1105	22	14	11	16	15.3231	0.135389	0.583082	0.232117	0.816447	0.89767	N	NA
PPP1R12C	NM_017607	1677	1755	1951	2057	13	18	17	10	14.5425	-0.0646999	0.605789	-0.10685	0.914908	0.953841	N	NA
PPP1R12C	NM_017607	1993	2058	2204	2266	9	14	15	18	14.1835	-0.675639	0.604315	-1.11716	0.263927	0.470241	N	NA
TNNT1	NM_001291774	605	667	810	916	24	29	7	10	16.6232	1.2351	0.581744	2.11067	0.0348009	0.127627	N	NA
TNNT1	NM_001291774	396	460	641	715	30	23	6	9	15.954	1.37716	0.593447	2.30236	0.021315	0.0923827	N	NA
PPP6R1	NM_014931	2156	2250	2456	2536	12	16	22	19	17.5896	-0.730773	0.557605	-1.30959	0.190333	0.381531	N	NA
PPP6R1	NM_014931	3145	3194	3382	3489	12	16	18	14	15.1591	-0.405928	0.588902	-0.689344	0.490607	0.664693	N	NA
PPP6R1	NM_014931	2810	2886	3107	3172	10	15	15	15	13.8742	-0.454386	0.607096	-0.748387	0.454226	0.639227	N	NA
RPL28	NM_001136134	301	367	561	614	105	93	58	53	74.9936	0.550488	0.299696	1.83634	0.0663073	0.199601	N	NA
RPL28	NM_001136134	246	367	561	650	34	31	47	38	37.9724	-0.626943	0.405664	-1.54511	0.122319	0.295172	N	NA
UBE2S	NM_014501	713	777	924	1007	38	27	12	25	24.4346	0.518495	0.497172	1.04189	0.297463	0.510433	N	NA
UBE2S	NM_014501	178	241	335	426	23	31	14	15	20.1815	0.585011	0.528952	1.10485	0.269224	0.476818	N	NA
U2AF2	NM_001012478	1099	1241	1403	1496	20	22	12	7	14.7894	0.762744	0.603465	1.26139	0.207169	0.401519	N	NA
U2AF2	NM_001012478	2038	2136	2249	2333	16	17	9	8	12.1251	0.596395	0.636441	0.935537	0.349512	0.55494	N	NA
TRIM28	NM_005762	175	259	462	541	76	89	40	48	61.2912	0.631463	0.330339	1.91074	0.0560385	0.180415	N	NA
TRIM28	NM_005762	50	125	229	298	56	47	11	17	30.7368	1.51423	0.459836	3.27582	0.00105354	0.0111284	Y	control
TRIM28	NM_005762	2021	2088	2256	2338	31	27	19	28	25.7151	0.0452598	0.471094	0.0960645	0.923469	0.959323	N	NA
TRIM28	NM_005762	1615	1707	1943	2016	14	20	27	25	21.9435	-0.798798	0.513195	-1.5553	0.119875	0.291669	N	NA
TRIM28	NM_005762	1448	1516	1658	1721	20	17	12	13	15.1295	0.267223	0.581134	0.459652	0.645766	0.790585	N	NA
UBE2M	NM_003969	147	227	455	508	43	45	21	23	31.88	0.697143	0.433971	1.60485	0.108526	0.272707	N	NA
UBE2M	NM_003969	394	488	576	644	22	20	17	23	20.2629	-0.169956	0.517478	-0.328422	0.742593	0.85841	N	NA
RIPOR3	NR_110890	328	406	591	695	23	29	34	29	29.0657	-0.506022	0.455137	-1.1117	0.266265	0.472527	N	NA
ID1	NM_181353	456	532	771	855	31	20	5	4	13.8991	1.89497	0.648444	2.86613	0.00415522	0.0287443	Y	control
NORAD	NR_027451	243	307	420	534	13	11	21	17	15.8232	-0.834067	0.57926	-1.43794	0.150452	0.331747	N	NA
SOGA1	NM_080627	220	310	479	556	15	18	21	19	18.4212	-0.489325	0.542628	-0.901636	0.36725	0.567221	N	NA
SOGA1	NM_080627	696	758	932	1027	15	20	10	16	14.9422	0.165046	0.590792	0.279297	0.780017	0.88089	N	NA
PABPC1L	NM_001124756	942	1057	1115	1200	15	5	49	39	28.5448	-2.22101	0.512217	-4.28867	1.79747549473329e-05	0.000495429	Y	arsenite
PABPC1L	NM_001124756	606	706	817	887	6	6	23	24	15.4856	-1.94797	0.611176	-3.14301	0.0016722	0.0152049	Y	arsenite
CEBPB	NM_005194	818	889	1083	1181	18	19	30	31	24.9652	-0.911398	0.480847	-1.89327	0.0583215	0.183713	N	NA
CEBPB	NM_005194	977	1061	1156	1244	17	13	26	26	20.8976	-0.971434	0.518699	-1.86974	0.0615194	0.190721	N	NA
CEBPB	NM_001285879	977	1059	1157	1246	18	13	25	29	21.5858	-0.976963	0.511937	-1.90518	0.0567562	0.181702	N	NA
CEBPB	NM_001285879	745	804	971	1047	12	12	25	19	17.5124	-1.02921	0.562579	-1.82564	0.0679047	0.201996	N	NA
CEBPB	NM_001285879	1169	1240	1463	1573	10	12	19	18	15.086	-0.895648	0.58957	-1.51662	0.129363	0.303856	N	NA
CEBPB	NM_001285878	818	887	1082	1181	16	18	29	24	22.2279	-0.833659	0.508384	-1.63832	0.101354	0.26033	N	NA
CEBPB	NM_001285878	977	1061	1157	1244	17	12	24	25	19.8267	-0.933769	0.52976	-1.75981	0.0784395	0.222094	N	NA
OGFR	NM_007346	917	989	1102	1199	21	16	21	13	17.7191	-0.146959	0.558675	-0.263105	0.79247	0.888478	N	NA
OGFR	NM_007346	1683	1730	1938	1999	18	16	13	9	13.7345	0.307152	0.609007	0.504202	0.61412	0.770489	N	NA
OGFR	NM_007346	1818	1912	2139	2205	9	20	11	13	13.1741	0.0284586	0.631782	0.0450548	0.964064	0.976726	N	NA
RRP1	NM_003683	1237	1330	1413	1505	41	25	19	17	24.6067	0.550066	0.491061	1.11925	0.263033	0.469626	N	NA
RRP1	NM_003683	1038	1115	1262	1356	31	31	15	24	24.4861	0.388303	0.484613	0.800828	0.423231	0.614975	N	NA
COL18A1	NM_030582	2293	2377	2477	2576	16	10	13	19	14.4221	-0.494736	0.597166	-0.827982	0.407681	0.601758	N	NA
COL18A1	NM_030582	2001	2090	2293	2371	10	9	13	21	13.3974	-0.949629	0.617577	-1.53384	0.12507	0.298139	N	NA
PCNT	NM_001315529	8098	8185	8268	8358	20	13	13	23	17.0128	-0.340965	0.564236	-0.604098	0.545778	0.713122	N	NA
PCNT	NM_001315529	3609	3665	3845	3936	22	9	22	14	16.8214	-0.456255	0.587112	-0.776929	0.437201	0.626837	N	NA
PCNT	NM_001315529	7402	7447	7625	7717	9	12	15	14	12.6936	-0.629768	0.626189	-1.00508	0.314859	0.526457	N	NA
CCT8	NM_001282908	165	268	293	379	16	14	10	11	12.4668	0.217902	0.623952	0.349111	0.727006	0.848173	N	NA
PAXBP1	NM_013329	270	378	476	527	13	12	17	8	12.6133	-0.249335	0.639736	-0.389905	0.696607	0.826928	N	NA
PAXBP1	NM_016631	164	245	390	480	24	16	14	14	16.5908	0.216318	0.564323	0.383215	0.701561	0.828904	N	NA
SON	NM_138927	1315	1391	1826	1908	20	15	17	16	16.8683	-0.168397	0.558156	-0.30172	0.762865	0.871564	N	NA
SON	NM_138927	1393	1452	1609	1687	12	15	16	14	14.3422	-0.366183	0.597047	-0.613364	0.539635	0.707745	N	NA
SON	NM_138927	1621	1695	1815	1898	11	11	24	9	14.2289	-0.761852	0.632151	-1.20425	0.228494	0.432935	N	NA
SON	NM_138927	1826	1905	2040	2106	10	8	20	15	13.6665	-1.07841	0.618092	-1.73937	0.0819698	0.227708	N	NA
HMGN1	NM_004965	71	141	207	344	25	15	14	6	14.5375	0.608941	0.619896	0.981175	0.326506	0.534098	N	NA
HMGN1	NM_004965	306	385	485	555	23	14	7	13	13.6168	0.549258	0.6176	0.887789	0.374654	0.571206	N	NA
CBS	NM_001178008	1922	1998	2141	2206	13	7	16	19	13.9337	-0.943008	0.610991	-1.53969	0.123637	0.296219	N	NA
CBS	NM_001320298	1916	1992	2135	2200	13	7	16	19	13.9337	-0.943008	0.610991	-1.53969	0.123637	0.296219	N	NA
CBS	NM_001321072	1993	2057	2208	2286	21	14	31	40	27.0055	-1.19329	0.472694	-2.51882	0.0117748	0.0627136	N	NA
CBS	NM_001321072	95	165	357	421	12	10	17	26	16.4967	-1.08805	0.573331	-1.89235	0.0584442	0.183771	N	NA
CBS	NM_001321072	293	356	1166	1272	11	12	12	17	13.0176	-0.510309	0.616768	-0.826981	0.408248	0.601758	N	NA
CBS	NM_000071	1899	1991	2134	2204	22	10	25	26	20.977	-0.865503	0.529633	-1.63199	0.102682	0.262129	N	NA
SUMO3	NM_001286416	232	312	426	513	35	27	17	7	20.6638	0.969135	0.550225	1.75713	0.0788952	0.222094	N	NA
MCM3AP	NM_003906	3212	3263	3497	3584	16	16	16	13	15.1889	-0.114014	0.582416	-0.195801	0.844766	0.913092	N	NA
MYO18B	NM_001318245	767	828	1026	1116	6	3	30	34	19.346	-2.70979	0.60117	-4.36467	1.27316621633525e-05	0.000387218	Y	arsenite
MYO18B	NM_032608	775	829	1020	1111	5	3	25	27	15.9013	-2.54399	0.63561	-3.87664	0.00010591	0.00198751	Y	arsenite
MYH9	NM_002473	4886	4968	5076	5129	55	45	38	43	44.4839	0.0378687	0.370565	0.10219	0.918606	0.955699	N	NA
MYH9	NM_002473	3845	3918	4069	4162	44	36	33	34	36.2397	-0.0110261	0.405599	-0.027185	0.978312	0.986368	N	NA
MYH9	NM_002473	4443	4515	4684	4752	31	36	26	30	30.3852	0.00292041	0.439449	0.00664582	0.994697	0.995826	N	NA
MYH9	NM_002473	2847	2928	3102	3163	22	27	15	24	21.5947	0.0781475	0.511583	0.152742	0.878602	0.935089	N	NA
MYH9	NM_002473	2543	2612	2778	2851	13	14	20	15	15.7356	-0.574853	0.579802	-0.991129	0.321623	0.530227	N	NA
MAPK1	NM_002745	38	102	201	293	16	17	11	20	15.7539	-0.136416	0.57772	-0.236104	0.813352	0.89767	N	NA
MAPK1	NM_002745	198	312	403	452	20	10	14	16	14.8139	-0.242693	0.594604	-0.408091	0.683207	0.818735	N	NA
MAPK1	NM_138957	40	103	198	297	17	16	10	17	14.6809	0.0361815	0.590611	0.0612493	0.951161	0.973423	N	NA
PPM1F	NM_014634	1377	1441	1649	1730	27	25	29	26	26.7698	-0.326558	0.463466	-0.704611	0.481052	0.659344	N	NA
PPM1F	NM_014634	2620	2707	3154	3242	17	13	26	27	21.1517	-0.996327	0.516189	-1.92679	0.0540056	0.175767	N	NA
PPM1F	NM_014634	2914	2997	3109	3173	14	14	26	28	20.9946	-1.10471	0.518788	-2.12467	0.0336145	0.124536	N	NA
PPM1F	NM_014634	56	132	308	399	17	26	20	16	19.6957	-0.00422265	0.537592	-0.00785658	0.993731	0.995826	N	NA
PPM1F	NM_014634	4035	4130	4516	4572	20	18	20	18	18.9571	-0.244994	0.532789	-0.459869	0.64561	0.790585	N	NA
PPM1F	NM_014634	1780	1853	2015	2084	24	13	14	16	16.3884	0.0258851	0.571139	0.0453154	0.963856	0.976726	N	NA
PPM1F	NM_014634	3188	3262	3416	3496	23	15	12	15	15.812	0.201756	0.574753	0.350902	0.725662	0.847468	N	NA
PPM1F	NM_014634	739	835	964	1038	14	10	14	15	13.2639	-0.474123	0.611789	-0.774656	0.438543	0.627735	N	NA
BCR	NM_004327	769	840	1200	1270	40	34	49	72	49.197	-0.924983	0.3631	-2.54578	0.0109033	0.059546	N	NA
BCR	NM_004327	875	979	1066	1128	15	24	31	26	24.5212	-0.744176	0.497388	-1.49541	0.134809	0.31126	N	NA
BCR	NM_004327	1495	1586	1737	1868	18	23	18	25	20.9076	-0.289332	0.516141	-0.56056	0.575098	0.7391	N	NA
BCR	NM_004327	2638	2710	2962	3028	17	22	18	27	20.9629	-0.412485	0.517795	-0.796497	0.425743	0.617607	N	NA
BCR	NM_004327	560	645	748	814	14	12	22	17	16.5661	-0.769494	0.569546	-1.3497	0.177112	0.367993	N	NA
BCR	NM_021574	616	694	1039	1140	72	68	75	99	78.5623	-0.555121	0.290506	-1.91067	0.0560474	0.180415	N	NA
BCR	NM_021574	895	996	1109	1218	51	62	70	72	64.2956	-0.569833	0.322551	-1.76647	0.0773165	0.221185	N	NA
BCR	NM_021574	2632	2698	2964	3030	38	35	23	45	34.601	-0.13362	0.427623	-0.312445	0.754703	0.867176	N	NA
BCR	NM_021574	1503	1588	1757	1874	26	32	28	39	31.2244	-0.429047	0.438457	-0.978432	0.327861	0.534516	N	NA
BCR	NM_021574	391	469	615	712	17	21	11	15	15.647	0.265741	0.577573	0.459924	0.645571	0.790585	N	NA
BCR	NM_021574	1869	1966	2123	2209	17	13	15	15	14.9125	-0.239494	0.58427	-0.409906	0.681875	0.817953	N	NA
BCR	NM_021574	188	229	377	454	9	12	16	17	13.7458	-0.79526	0.609337	-1.30341	0.192434	0.383558	N	NA
BCR	NM_021574	154	227	651	791	14	10	9	18	12.5758	-0.362662	0.63088	-0.574572	0.565581	0.728769	N	NA
RPL3	NM_001033853	72	142	251	314	41	40	11	14	25.0768	1.32719	0.492801	2.68061	0.00734879	0.0443947	Y	control
RPL3	NM_001033853	511	581	678	757	34	34	15	9	22.0337	1.11719	0.524467	2.12309	0.0337462	0.124536	N	NA
RPL3	NM_001033853	808	872	1010	1104	25	18	8	11	14.778	0.807521	0.596121	1.35077	0.176768	0.367711	N	NA
RPL3	NM_000967	768	898	1090	1163	58	48	16	24	34.6343	1.08388	0.427176	2.53157	0.0113553	0.061256	N	NA
RPL3	NM_000967	404	475	615	708	45	49	21	14	30.9728	1.078	0.456363	2.35692	0.0184273	0.0829493	N	NA
RPL3	NM_000967	657	728	823	903	40	39	18	14	26.6543	0.95907	0.476377	2.00909	0.0445273	0.153192	N	NA
SEPT5-GP1BB	NR_037611	4145	4267	4317	4381	22	20	11	9	14.9658	0.706333	0.591418	1.19202	0.233254	0.438053	N	NA
SEPT5-GP1BB	NR_037612	2634	2730	2806	2871	22	19	11	9	14.7289	0.673391	0.594514	1.13066	0.258197	0.465705	N	NA
COMT	NM_001135161	192	269	378	443	22	17	7	10	13.3491	0.817282	0.618333	1.31753	0.18766	0.377459	N	NA
COMT	NM_001135162	211	288	391	474	26	19	10	10	15.5569	0.797512	0.584067	1.36202	0.173191	0.364568	N	NA
COMT	NM_000754	270	334	433	533	22	29	11	7	16.5892	1.09327	0.586594	1.85615	0.0634319	0.193924	N	NA
COMT	NM_000754	180	252	418	485	19	20	7	12	13.9198	0.692486	0.608853	1.13475	0.256478	0.464029	N	NA
DGCR8	NM_022720	640	719	947	1014	29	26	20	16	22.2876	0.311232	0.503063	0.618524	0.53623	0.705439	N	NA
DGCR8	NM_022720	478	546	914	978	15	23	12	11	14.9625	0.413437	0.59524	0.694179	0.48757	0.661597	N	NA
RANBP1	NM_001278639	831	915	1012	1064	28	37	9	13	20.7242	1.1939	0.536214	2.21676	0.0266393	0.107287	N	NA
DGCR8	NM_001190326	478	546	918	983	15	21	12	9	13.9807	0.449612	0.610558	0.735914	0.461783	0.645471	N	NA
DGCR8	NM_001190326	642	712	971	1041	19	17	10	8	13.0632	0.633038	0.620843	1.01789	0.308732	0.521651	N	NA
PI4KAP1	NR_003563	1562	1639	1851	1932	21	14	14	12	14.9611	0.133659	0.588059	0.227266	0.820217	0.89767	N	NA
LZTR1	NM_006767	3619	3691	3858	3943	16	22	22	21	20.3827	-0.39833	0.523566	-0.76081	0.44677	0.634033	N	NA
CRKL	NM_005207	104	161	266	365	15	23	15	7	14.8164	0.447835	0.614805	0.728169	0.46651	0.647972	N	NA
CRKL	NM_005207	346	427	586	683	16	13	11	17	14.0444	-0.179706	0.598882	-0.300029	0.764155	0.871907	N	NA
HIC2	NM_015094	1085	1175	1396	1462	36	27	42	57	40.8339	-0.868809	0.391824	-2.21582	0.0267037	0.107301	N	NA
HIC2	NM_015094	73	157	256	343	20	25	19	23	21.5952	-0.140394	0.507501	-0.276658	0.782043	0.882003	N	NA
HIC2	NM_015094	2157	2244	2377	2466	12	17	17	26	18.1546	-0.73008	0.55251	-1.32024	0.186756	0.37705	N	NA
HIC2	NM_015094	1610	1687	1808	1897	12	11	20	18	15.5712	-0.883079	0.581248	-1.51682	0.129313	0.303856	N	NA
HIC2	NM_015094	4184	4249	4498	4544	9	15	18	19	15.5446	-0.776034	0.587603	-1.31935	0.187053	0.37705	N	NA
HIC2	NM_015094	5847	5940	6102	6166	12	10	12	20	13.5221	-0.692054	0.612334	-1.12882	0.258975	0.466155	N	NA
SDF2L1	NM_022044	81	145	262	357	28	34	14	12	21.2098	0.903916	0.523154	1.72391	0.0847232	0.232429	N	NA
SDF2L1	NM_022044	188	271	428	489	13	13	11	17	13.3964	-0.312413	0.609679	-0.512331	0.60842	0.764879	N	NA
YDJC	NM_001017964	397	461	652	752	48	42	14	7	26.1542	1.66595	0.508231	3.25443	0.00113621	0.0117898	Y	control
YDJC	NM_001017964	90	178	253	338	32	41	13	7	22.1714	1.44515	0.538825	2.66633	0.00766835	0.0453473	Y	control
YDJC	NM_001017964	838	918	1052	1122	35	27	7	5	17.2552	1.84146	0.595299	3.04884	0.00229728	0.0185806	Y	control
PPIL2	NM_148176	1856	1938	2044	2125	19	16	29	23	22.1481	-0.777017	0.508332	-1.52735	0.126674	0.300745	N	NA
PPIL2	NM_001317996	2860	2942	3064	3134	20	16	25	23	21.2039	-0.629173	0.512102	-1.22801	0.219445	0.417134	N	NA
PPIL2	NM_148175	1980	2062	2184	2254	20	16	25	23	21.2039	-0.629173	0.512102	-1.22801	0.219445	0.417134	N	NA
PPIL2	NM_014337	3238	3327	3441	3517	26	23	29	26	26.0802	-0.406757	0.46892	-0.867383	0.385732	0.581069	N	NA
PPIL2	NM_014337	1575	1686	3074	3122	22	10	11	7	12.0892	0.455921	0.653008	0.697515	0.48548	0.661303	N	NA
TOP3B	NM_003935	60	115	431	499	18	15	12	17	15.2401	-0.0627245	0.579387	-0.108251	0.913796	0.953245	N	NA
PRAME	NM_206953	263	339	480	563	51	58	29	48	45.3588	0.245553	0.378991	0.647806	0.51711	0.68844	N	NA
PRAME	NM_206953	353	446	529	605	34	37	26	16	27.7132	0.447383	0.473132	0.945276	0.344518	0.549142	N	NA
PRAME	NM_206953	145	224	838	924	30	25	14	10	19.0021	0.830619	0.544915	1.52112	0.128229	0.302631	N	NA
MIF-AS1	NR_038911	1051	1131	1320	1388	60	46	10	7	28.5333	2.17046	0.502489	4.26013	2.04307160911992e-05	0.000546606	Y	control
MIF-AS1	NR_038911	779	863	958	1048	40	35	4	4	19.1057	2.57941	0.60824	4.09142	4.28742755792069e-05	0.000933706	Y	control
EWSR1	NM_013986	1937	2010	2153	2228	19	12	10	12	12.8952	0.196836	0.620024	0.317333	0.750991	0.865282	N	NA
EWSR1	NM_001163286	1753	1834	1971	2045	19	11	10	12	12.6583	0.153457	0.625808	0.245127	0.806358	0.897413	N	NA
EWSR1	NM_001163285	1918	1992	2126	2208	24	17	13	14	16.5376	0.298589	0.563994	0.529173	0.596686	0.758329	N	NA
EWSR1	NM_005243	1954	2042	2143	2213	28	16	16	14	18.0349	0.244539	0.552931	0.442134	0.658392	0.799847	N	NA
CDC42EP1	NM_152243	1148	1224	1419	1519	14	14	16	13	14.2833	-0.283319	0.596304	-0.475189	0.634652	0.785481	N	NA
DDX17	NM_006386	120	185	332	391	14	8	21	25	17.3612	-1.19276	0.566166	-2.09951	0.0357716	0.130374	N	NA
DDX17	NM_001098504	173	280	370	447	20	23	43	44	33.4179	-1.20362	0.431123	-2.787	0.00531984	0.0346644	Y	arsenite
ATF4	NM_001675	112	194	796	861	48	44	35	28	38.0541	0.259919	0.403582	0.643971	0.519594	0.691225	N	NA
ATF4	NM_001675	1493	1543	1796	1892	31	30	13	21	22.9069	0.546105	0.499295	1.09268	0.274533	0.482348	N	NA
ATF4	NM_001675	972	1056	1280	1338	17	7	18	11	13.3453	-0.494677	0.634626	-0.779181	0.435873	0.626557	N	NA
ATF4	NM_182810	352	447	653	706	18	9	15	12	13.4189	-0.249749	0.619401	-0.4032	0.686801	0.821268	N	NA
LOC283788	NR_027436	150	232	522	557	26	17	27	41	27.8899	-0.857287	0.46557	-1.83951	0.0658398	0.198817	N	NA
LOC283788	NR_027436	67	232	522	541	21	21	31	30	26.1228	-0.747752	0.470224	-1.58922	0.112011	0.279473	N	NA
LOC100507412	NR_038958	2320	2445	2466	2584	11	39	5	8	15.0955	1.46075	0.660738	2.19191	0.0283861	0.11202	N	NA
